# Supplementary material for: Validation of a commercially available mobile application for velocity-based resistance training
Source: PeerJ. 2024 Jul 24;12:e17789. doi: 10.7717/peerj.17789 (PMC11283170; doi:10.7717/peerj.17789)
Supplement: Supplemental Information 3 [file peerj-12-17789-s003.xlsx]

## Sheet: Data outline
This file contains the individual data used within this study.
VEL_VICON_MID	Mean bar velocity during the concentric phase as measured by 3D motion analysis (Vicon) from the mid-point of the bar
VEL_METRIC	Mean bar velocity during the concentric phase as measured by Metric VBT
ROM_VICON_MID	Range of motion during concentric phase as measured by 3D motion analysis (Vicon) from the mid-point of the bar
ROM_METRIC	Range of motion during concentric phase as measured by Metric VBT
TP / FP / FN	True positive / False positive / False negative

## Sheet: Squat
ID	Exercise	Load (%1RM)	Load (KG)	Camera	Rep	VEL_VICON_MID	VEL_METRIC	ROM_VICON_MID	ROM_METRIC	TP / FP / FN
1	Squat	25	15	1	1	0.882561		55.5344		Error
1	Squat	25	15	1	2	0.804045		57.5789		Error
1	Squat	25	15	1	3	0.737831		60.3321		Error
1	Squat	25	15	1	4	0.787147		59.1487		Error
1	Squat	25	15	1	5	0.710708		60.2796		Error
1	Squat	50	30	1	1	0.763842		55.4876		Error
1	Squat	50	30	1	2	0.639708		55.6217		Error
1	Squat	50	30	1	3	0.622586		52.5204		Error
1	Squat	50	30	1	4	0.681151		56.9383		Error
1	Squat	50	30	1	5	0.629146		55.8897		Error
1	Squat	70	42	1	1	0.650933		53.6285		Error
1	Squat	70	42	1	2	0.612957		53.75		Error
1	Squat	70	42	1	3	0.624136		55.24		Error
1	Squat	70	42	1	4	0.57632		53.5034		Error
1	Squat	70	42	1	5	0.542568		54.5286		Error
1	Squat	90	53	1	1	0.551932		55.4635		Error
1	Squat	90	53	1	2	0.454525		51.4619		Error
1	Squat	90	53	1	3	0.449482		52.7494		Error
1	Squat	100	60	1	1	0.298055		50.6309		Error
2	Squat	25	18	1	1	1.05044		52.5337		Error
2	Squat	25	18	1	2	1.02271		50.0292		Error
2	Squat	25	18	1	3	1.18536		51.23		Error
2	Squat	25	18	1	4	1.18853		50.8833		Error
2	Squat	25	18	1	5	1.17116		51.5559		Error
2	Squat	50	38	1	1	0.858461		57.7768		Error
2	Squat	50	38	1	2	0.881238		56.6186		Error
2	Squat	50	38	1	3	0.89857		56.8498		Error
2	Squat	50	38	1	4	0.914079		55.4056		Error
2	Squat	50	38	1	5	0.932193		54.1829		Error
2	Squat	70	52	1	1	0.793862		55.4226		Error
2	Squat	70	52	1	2	0.80158		56.3507		Error
2	Squat	70	52	1	3	0.789125		56.4802		Error
2	Squat	70	52	1	4	0.793098		57.3565		Error
2	Squat	70	52	1	5	0.805217		56.0846		Error
2	Squat	90	68	1	1	0.675591		56.3461		Error
2	Squat	90	68	1	2	0.734409		52.9507		Error
2	Squat	90	68	1	3	0.652765		57.4188		Error
2	Squat	100	75	1	1	0.251669	0.33	52.6429	49.9	TP
3	Squat	25	15	1	1	0.496385	0.6	46.1226	47.8	TP
3	Squat	25	15	1	2	0.703039	0.83	49.9288	47.7	TP
3	Squat	25	15	1	3	0.756813	0.92	49.7773	49.1	TP
3	Squat	25	15	1	4	0.698454	0.84	53.1196	52.5	TP
3	Squat	25	15	1	5	0.739875	0.9	55.2657	54.7	TP
3	Squat	50	32	1	1	0.655368	0.69	43.4857	40.7	TP
3	Squat	50	32	1	2	0.6717	0.74	42.2246	39.7	TP
3	Squat	50	32	1	3	0.590034	0.67	40.6378	39.5	TP
3	Squat	50	32	1	4	0.59062	0.64	41.7037	39.3	TP
3	Squat	50	32	1	5	0.620224	0.66	41.1811	38.7	TP
3	Squat	70	45	1	1	0.520804	0.73	37.1555	36	TP
3	Squat	70	45	1	2	0.438437	0.6	38.6956	37.5	TP
3	Squat	70	45	1	3	0.494045	0.68	37.2319	37.2	TP
3	Squat	70	45	1	4	0.464316	0.67	37.7339	37.9	TP
3	Squat	70	45	1	5	0.446139	0.68	38.0338	39.9	TP
3	Squat	90	57	1	1	0.526142	0.77	35.6024	34.7	TP
3	Squat	90	57	1	2	0.448822	0.69	37.396	36.2	TP
3	Squat	90	57	1	3	0.424628	0.59	39.8014	38.5	TP
3	Squat	100	63	1	1	0.384044	0.45	34.3961	33.7	TP
4	Squat	25	22	1	1	0.695895		53.426		Error
4	Squat	25	22	1	2	0.759269		56.8088		Error
4	Squat	25	22	1	3	0.818088		56.6138		Error
4	Squat	25	22	1	4	0.793857		56.9793		Error
4	Squat	25	22	1	5	0.653443		55.8029		Error
4	Squat	50	42	1	1	0.74		49.82		Error
4	Squat	50	42	1	2	0.74		52.18		Error
4	Squat	50	42	1	3	0.73		52.54		Error
4	Squat	50	42	1	4	0.73		52.39		Error
4	Squat	50	42	1	5	0.73		52.38		Error
4	Squat	70	60	1	1	0.629008		46.7742		Error
4	Squat	70	60	1	2	0.5858		50.6181		Error
4	Squat	70	60	1	3	0.589648		52.3576		Error
4	Squat	70	60	1	4	0.596855		50.9497		Error
4	Squat	70	60	1	5	0.580732		51.7619		Error
4	Squat	90	77	1	1	0.495015		43.9209		Error
4	Squat	90	77	1	2	0.456521		48.1182		Error
4	Squat	90	77	1	3	0.398466		50.6018		Error
4	Squat	100	85	1	1	0.323134		49.2848		Error
5	Squat	25	40	1	1	1.11147	1.28	63.3572	64.9	TP
5	Squat	25	40	1	2	1.10056	1.28	63.3887	65.9	TP
5	Squat	25	40	1	3	1.11016	1.28	63.5264	64.5	TP
5	Squat	25	40	1	4	1.07331	1.19	64.1147	64.4	TP
5	Squat	25	40	1	5	1.18268	1.35	67.1489	66.9	TP
5	Squat	50	78	1	1	0.90818	1.05	64.8005	65.4	TP
5	Squat	50	78	1	2	0.876887	1	65.3685	65.5	TP
5	Squat	50	78	1	3	0.909705	0.99	64.409	65.7	TP
5	Squat	50	78	1	4	0.90737	1.05	64.5549	64.2	TP
5	Squat	50	78	1	5	0.862934	0.98	66.6815	66.5	TP
5	Squat	70	108	1	1	0.782012	0.96	63.9204	65.4	TP
5	Squat	70	108	1	2	0.749922	0.93	67.5321	67.8	TP
5	Squat	70	108	1	3	0.769455	0.89	65.8444	65.3	TP
5	Squat	70	108	1	4	0.748357	0.88	64.231	64.4	TP
5	Squat	70	108	1	5	0.770126	0.92	65.325	66.3	TP
5	Squat	90	140	1	1	0.592519	0.71	67.4243	64.3	TP
5	Squat	90	140	1	2	0.545659	0.61	69.7402	66.8	TP
5	Squat	90	140	1	3	0.485091	0.56	66.9818	66.8	TP
5	Squat	100	155	1	1	0.511752	0.6	67.8341	66.4	TP
6	Squat	25	15	1	1	0.788835	0.93	54.3626	54.6	TP
6	Squat	25	15	1	2	0.822044	1.04	57.0222	60.7	TP
6	Squat	25	15	1	3	0.818831	1.02	57.4974	59.7	TP
6	Squat	25	15	1	4	0.813836	0.99	60.1266	62.2	TP
6	Squat	25	15	1	5	0.801625	0.92	62.1208	63.1	TP
6	Squat	50	28	1	1	0.614361	0.78	52.9297	53.8	TP
6	Squat	50	28	1	2	0.676008	0.88	53.1945	53.8	TP
6	Squat	50	28	1	3	0.66928	0.85	53.7445	54.9	TP
6	Squat	50	28	1	4	0.641045	0.83	54.2177	55.2	TP
6	Squat	50	28	1	5	0.621343	0.74	55.8559	57.1	TP
6	Squat	70	38	1	1	0.564678	0.62	53.7972	51.1	TP
6	Squat	70	38	1	2	0.56025	0.69	51.54	51	TP
6	Squat	70	38	1	3	0.560015	0.7	53.9897	53.1	TP
6	Squat	70	38	1	4	0.576419	0.65	55.196	55.9	TP
6	Squat	70	38	1	5	0.547237	0.65	54.322	52.6	TP
6	Squat	90	50	1	1	0.417127	0.53	49.5066	54.2	TP
6	Squat	90	50	1	2	0.424572	0.58	49.502	53.1	TP
6	Squat	90	50	1	3	0.375691	0.56	50.5524	53.5	TP
6	Squat	100	55	1	1	0.424991	0.61	50.3052	52.8	TP
7	Squat	25	28	1	1	0.951371	0.97	58.8989	54.4	TP
7	Squat	25	28	1	2	0.996863	1.08	64.1016	60.9	TP
7	Squat	25	28	1	3	1.01384	1.07	64.1131	60.7	TP
7	Squat	25	28	1	4	1.00187	1.08	64.8392	62.9	TP
7	Squat	25	28	1	5	0.964578	1.05	65.0259	63.3	TP
7	Squat	50	55	1	1	0.763744	0.81	56.2726	54.6	TP
7	Squat	50	55	1	2	0.743838	0.79	52.0522	51.4	TP
7	Squat	50	55	1	3	0.761612	0.84	55.9103	55	TP
7	Squat	50	55	1	4	0.738533	0.81	56.0693	55	TP
7	Squat	50	55	1	5	0.585125	0.6	56.3983	53.8	TP
7	Squat	70	77	1	1	0.594078	0.67	52.3413	52.2	TP
7	Squat	70	77	1	2	0.602798	0.75	50.4463	49.2	TP
7	Squat	70	77	1	3	0.57382	0.73	49.4728	47.3	TP
7	Squat	70	77	1	4	0.572995	0.72	49.2448	48.8	TP
7	Squat	70	77	1	5	0.551512	0.64	49.8925	48.1	TP
7	Squat	90	98	1	1	0.461282	0.58	45.6633	45.2	TP
7	Squat	90	98	1	2	0.416162	0.54	44.7188	42.1	TP
7	Squat	90	98	1	3	0.412745	0.53	44.7226	44.2	TP
7	Squat	100	110	1	1	0.395197	0.5	43.6692	42.3	TP
8	Squat	25	20	1	1	0.84454	0.96	52.2296	52.2	TP
8	Squat	25	20	1	2	0.785306	0.93	51.6331	51.4	TP
8	Squat	25	20	1	3	0.890328	1.01	57.5233	55.7	TP
8	Squat	25	20	1	4	0.888069	0.96	55.6579	51.9	TP
8	Squat	25	20	1	5	0.957104	1.07	57.8985	55.8	TP
8	Squat	50	40	1	1	0.784013	0.91	52.8027	52.8	TP
8	Squat	50	40	1	2	0.761644	0.93	53.7841	55.4	TP
8	Squat	50	40	1	3	0.771314	0.9	57.8072	60.1	TP
8	Squat	50	40	1	4	0.794143	0.92	56.4051	58	TP
8	Squat	50	40	1	5	0.746397	0.85	54.7633	55.8	TP
8	Squat	70	55	1	1	0.664146	0.77	51.6186	48.9	TP
8	Squat	70	55	1	2	0.661799	0.75	54.2321	53.1	TP
8	Squat	70	55	1	3	0.668626	0.79	54.8014	55.3	TP
8	Squat	70	55	1	4	0.655137	0.75	54.302	56.3	TP
8	Squat	70	55	1	5	0.646853	0.79	54.0949	58.6	TP
8	Squat	90	72	1	1	0.513388	0.66	48.9043	49.6	TP
8	Squat	90	72	1	2	0.527849	0.66	51.2337	52	TP
8	Squat	90	72	1	3	0.481808	0.59	51.3222	53.5	TP
8	Squat	100	80	1	1	0.261092	0.29	46.196	44.2	TP
9	Squat	25	22	1	1	0.884229	1.03	52.0898	54.9	TP
9	Squat	25	22	1	2	0.697538	0.83	49.3984	49.3	TP
9	Squat	25	22	1	3	0.771066	0.87	49.5645	50.1	TP
9	Squat	25	22	1	4	0.788711	0.91	52.6709	53	TP
9	Squat	25	22	1	5	0.81068	0.85	53.4701	50.7	TP
9	Squat	50	42	1	1	0.594411	0.63	44.9249	45.2	TP
9	Squat	50	42	1	2	0.599646	0.7	46.0323	47.7	TP
9	Squat	50	42	1	3	0.601116	0.71	44.9854	47.1	TP
9	Squat	50	42	1	4	0.579878	0.72	44.936	47.2	TP
9	Squat	50	42	1	5	0.521933	0.63	46.7601	47.9	TP
9	Squat	70	60	1	1	0.528844	0.63	42.8732	41.2	TP
9	Squat	70	60	1	2	0.498796	0.57	45.8679	47.3	TP
9	Squat	70	60	1	3	0.499412	0.56	43.5897	40.7	TP
9	Squat	70	60	1	4	0.436982	0.54	43.7994	44.2	TP
9	Squat	70	60	1	5	0.443473	0.54	42.3526	42.3	TP
9	Squat	90	77	1	1	0.399268	0.53	38.5088	38.3	TP
9	Squat	90	77	1	2	0.377107	0.57	41.0492	38.8	TP
9	Squat	90	77	1	3	0.376873	0.55	38.8894	37.6	TP
9	Squat	100	85	1	1	0.405071	0.59	39.4963	37.7	TP
10	Squat	25	22	1	1	0.857554	0.94	47.4242	45.7	TP
10	Squat	25	22	1	2	0.871685	1	50.4478	50.7	TP
10	Squat	25	22	1	3	0.917504	1.03	51.0716	50.7	TP
10	Squat	25	22	1	4	0.839747	0.91	49.2189	47.7	TP
10	Squat	25	22	1	5	0.914235	0.94	52.8861	51.5	TP
10	Squat	50	43	1	1	0.778909	0.95	48.0595	49.4	TP
10	Squat	50	43	1	2	0.740994	0.83	47.8759	47.3	TP
10	Squat	50	43	1	3	0.747814	0.84	50.9287	51	TP
10	Squat	50	43	1	4	0.718877	0.78	52.914	52	TP
10	Squat	50	43	1	5	0.658389	0.73	52.1763	51.8	TP
10	Squat	70	60	1	3	0.545512	0.6	44.4381	44.1	TP
10	Squat	70	60	1	4	0.49593	0.55	47.085	47.2	TP
10	Squat	70	60	1	5	0.480409	0.54	49.7682	49.9	TP
10	Squat	70	60	1	6	0.49646	0.55	48.8752	48.7	TP
10	Squat	90	77	1	1	0.468643	0.51	41.2569	37.7	TP
10	Squat	90	77	1	2	0.418319	0.47	46.4384	42.7	TP
10	Squat	90	77	1	3	0.3145	0.37	42.4531	43.2	TP
10	Squat	100	85	1	1	0.360341	0.4	46.1945	44.8	TP
11	Squat	25	30	1	1	1.11446	1.23	68.03	68.6	TP
11	Squat	25	30	1	2	1.14228	1.34	69.2446	69.8	TP
11	Squat	25	30	1	3	1.14688	1.24	70.8842	69.4	TP
11	Squat	25	30	1	4	1.16363	1.07	72.9604	60.3	TP
11	Squat	25	30	1	5	1.1806	0.91	74.0864	24.4	TP
11	Squat	50	60	1	1	0.995284	1.11	71.5972	71.6	TP
11	Squat	50	60	1	2	1.00934	1.07	74.578	74.6	TP
11	Squat	50	60	1	3	1.01269	1.08	76.7169	76.6	TP
11	Squat	50	60	1	4	0.998795	1.1	77.6947	77.3	TP
11	Squat	50	60	1	5	0.999967	1.08	77.4639	77.7	TP
11	Squat	70	82	1	1	0.835799	0.89	75.6951	75.2	TP
11	Squat	70	82	1	2	0.769841	0.84	74.5027	73.3	TP
11	Squat	70	82	1	3	0.800906	0.84	73.9317	73.8	TP
11	Squat	70	82	1	4	0.74836	0.79	76.3785	73.8	TP
11	Squat	70	82	1	5	0.730285	0.77	77.6125	78.3	TP
11	Squat	90	105	1	1	0.606548	0.74	75.0486	73.7	TP
11	Squat	90	105	1	2	0.522677	0.63	77.5292	79.4	TP
11	Squat	90	105	1	3	0.456695	0.46	77.1646	78	TP
11	Squat	100	115	1	1	0.29144	0.37	75.6281	76.1	TP
12	Squat	25	25	1	1	0.736259	0.83	52.4851	56.1	TP
12	Squat	25	25	1	2	0.836704	0.96	60.115	62	TP
12	Squat	25	25	1	3	0.808288	0.93	59.0599	60.1	TP
12	Squat	25	25	1	4	0.797892	0.88	60.1054	60.7	TP
12	Squat	25	25	1	5	0.794173	0.88	63.0913	63	TP
12	Squat	50	50	1	1	0.689149	0.89	51.8347	55.1	TP
12	Squat	50	50	1	2	0.705055	0.83	55.3695	57.4	TP
12	Squat	50	50	1	3	0.655574	0.75	56.9511	57.2	TP
12	Squat	50	50	1	4	0.682672	0.79	57.756	58.6	TP
12	Squat	50	50	1	5	0.652676	0.73	59.0696	60.3	TP
12	Squat	70	75	1	1	0.555219	0.64	52.2876	51.6	TP
12	Squat	70	75	1	2	0.539009	0.61	52.6389	50.7	TP
12	Squat	70	75	1	3	0.529846	0.65	52.5287	52.6	TP
12	Squat	70	75	1	4	0.509116	0.59	55.7551	56.1	TP
12	Squat	70	75	1	5	0.48376	0.54	55.2323	53.5	TP
12	Squat	90	90	1	1	0.353512	0.39	53.9235	53.2	TP
12	Squat	90	90	1	2	0.371631	0.45	51.8409	46.2	TP
12	Squat	90	90	1	3	0.378881	0.43	50.3856	49.8	TP
12	Squat	100	100	1	1	0.315475	0.43	47.0214	47.1	TP
13	Squat	25	28	1	1	1.14149	1.21	63.331	59.4	TP
13	Squat	25	28	1	2	1.21221	1.27	70.7194	67.7	TP
13	Squat	25	28	1	3	1.24203	1.3	77.7185	73.5	TP
13	Squat	25	28	1	4	1.2601	1.26	81.1329	74.2	TP
13	Squat	25	28	1	5	1.29347	1.36	82.7932	77.6	TP
13	Squat	50	55	1	1	0.998044	1.02	76.3401	68.6	TP
13	Squat	50	55	1	2	1.03083	1.11	78.9452	74.3	TP
13	Squat	50	55	1	3	1.0083	1.08	79.9604	75.4	TP
13	Squat	50	55	1	4	0.941435	1.02	80.3514	76.4	TP
13	Squat	50	55	1	5	0.960074	1.05	81.8047	80.2	TP
13	Squat	70	77	1	1	0.844099	0.91	73.7256	71.3	TP
13	Squat	70	77	1	2	0.807994	0.85	74.7799	72.5	TP
13	Squat	70	77	1	3	0.740119	0.77	75.3234	71.6	TP
13	Squat	70	77	1	4	0.782504	0.79	77.8761	70.6	TP
13	Squat	70	77	1	5	0.740593	0.78	78.0742	74.2	TP
13	Squat	90	97	1	1	0.635073	0.71	63.9535	60.7	TP
13	Squat	90	97	1	2	0.619533	0.63	68.6062	66	TP
13	Squat	90	97	1	3	0.583609	0.6	70.1335	69.1	TP
13	Squat	100	110	1	1	0.505085	0.66	65.8509	63.2	TP
14	Squat	25	28	1	1	0.923977	1.01	49.0507	47.2	TP
14	Squat	25	28	1	2	0.936213	1.06	50.6839	51	TP
14	Squat	25	28	1	3	0.951876	1.07	55.3675	56.3	TP
14	Squat	25	28	1	4	0.910761	1.02	57.6776	58.5	TP
14	Squat	25	28	1	5	0.929223	1.06	59.0311	60.6	TP
14	Squat	50	55	1	1	0.784763	0.88	52.3927	52.2	TP
14	Squat	50	55	1	2	0.74311	0.82	56.3687	54.2	TP
14	Squat	50	55	1	3	0.798575	0.89	57.9873	58.5	TP
14	Squat	50	55	1	4	0.777344	0.88	57.4198	57	TP
14	Squat	50	55	1	5	0.698806	0.77	57.1128	58	TP
14	Squat	70	77	1	1	0.64174	0.72	51.6896	50	TP
14	Squat	70	77	1	2	0.650219	0.7	54.618	52.4	TP
14	Squat	70	77	1	3	0.609666	0.68	55.3878	56.3	TP
14	Squat	70	77	1	4	0.628415	0.69	57.4348	58	TP
14	Squat	70	77	1	5	0.541223	0.59	59.5454	59.2	TP
14	Squat	90	95	1	1	0.539521	0.6	52.4001	50.7	TP
14	Squat	90	95	1	2	0.47767	0.54	55.5962	55.2	TP
14	Squat	90	95	1	3	0.440586	0.53	55.3497	55.2	TP
14	Squat	100	110	1	1	0.371261	0.42	55.7758	54.4	TP
15	Squat	25	35	1	1	1.10692	1.31	56.7534	57.8	TP
15	Squat	25	35	1	2	1.19002	1.34	65.3087	65.6	TP
15	Squat	25	35	1	3	1.24118	1.37	70.7262	71	TP
15	Squat	25	35	1	4	1.21069	1.35	71.0666	72.2	TP
15	Squat	25	35	1	5	1.18086	1.36	73.9022	74.8	TP
15	Squat	50	70	1	1	0.933745	1.02	65.101	65	TP
15	Squat	50	70	1	2	0.898963	0.97	66.6999	65.7	TP
15	Squat	50	70	1	3	0.914055	0.96	69.4757	68.6	TP
15	Squat	50	70	1	4	0.90243	0.96	69.3749	67.9	TP
15	Squat	50	70	1	5	0.92733	0.99	68.6429	68.4	TP
15	Squat	70	98	1	1	0.757382	0.83	70.2806	68.7	TP
15	Squat	70	98	1	2	0.751772	0.83	70.3098	71.6	TP
15	Squat	70	98	1	3	0.652333	0.73	69.5188	68.7	TP
15	Squat	70	98	1	4	0.633109	0.71	71.6119	70.3	TP
15	Squat	70	98	1	5	0.635352	0.78	71.3425	69.6	TP
15	Squat	90	125	1	1	0.560495	0.7	72.8416	69	TP
15	Squat	90	125	1	2	0.509764	0.64	70.5687	67	TP
15	Squat	90	125	1	3	0.416758	0.51	72.4822	70.2	TP
15	Squat	100	140	1	1	0.415549	0.44	70.4632	66.2	TP
16	Squat	25	17	1	1	0.760233	0.9	42.8815	44.2	TP
16	Squat	25	17	1	2	0.829165	0.95	44.8282	46.9	TP
16	Squat	25	17	1	3	0.820597	1.02	45.9218	48.7	TP
16	Squat	25	17	1	4	0.822841	0.95	47.3814	49.5	TP
16	Squat	25	17	1	5	0.821518	0.94	47.26	48.4	TP
16	Squat	50	35	1	1	0.623593	0.68	41.664	40.8	TP
16	Squat	50	35	1	2	0.629098	0.72	43.2097	44.8	TP
16	Squat	50	35	1	3	0.636741	0.75	43.6905	45.6	TP
16	Squat	50	35	1	4	0.650259	0.77	43.3355	46	TP
16	Squat	50	35	1	5	0.614366	0.7	42.7356	45.3	TP
16	Squat	70	48	1	1	0.519057	0.61	40.6168	41.3	TP
16	Squat	70	48	1	2	0.518141	0.6	41.765	42.2	TP
16	Squat	70	48	1	3	0.506247	0.6	42.308	44.3	TP
16	Squat	70	48	1	4	0.502213	0.59	42.9277	45.6	TP
16	Squat	70	48	1	5	0.48827	0.57	42.5679	43.5	TP
16	Squat	90	60	1	1	0.392579	0.55	40.6479	39	TP
16	Squat	90	60	1	2	0.366914	0.49	41.0101	38.1	TP
16	Squat	90	60	1	3	0.347488	0.54	42.2073	42.1	TP
16	Squat	100	68	1	1	0.274921	0.33	40.8034	40.5	TP
17	Squat	25	50	1	1	1.20637	1.43	66.0511	68.5	TP
17	Squat	25	50	1	2	1.20619	1.38	66.2323	68.9	TP
17	Squat	25	50	1	3	1.17656	1.34	67.8761	69.1	TP
17	Squat	25	50	1	4	1.20998	1.4	69.5214	70.9	TP
17	Squat	25	50	1	5	1.21835	1.34	73.1357	72.7	TP
17	Squat	50	100	1	1	0.968956	1.03	66.3748	64.7	TP
17	Squat	50	100	1	2	0.969652	1.05	69.1878	68.3	TP
17	Squat	50	100	1	3	0.978765	1.12	67.091	65.2	TP
17	Squat	50	100	1	4	0.960368	0.99	69.985	64.5	TP
17	Squat	50	100	1	5	0.968	1.04	75.1699	69.9	TP
17	Squat	70	140	1	1	0.767595	0.77	66.0389	61.3	TP
17	Squat	70	140	1	2	0.701394	0.7	64.9384	59.6	TP
17	Squat	70	140	1	3	0.691041	0.7	64.4186	59.9	TP
17	Squat	70	140	1	4	0.662169	0.7	64.7155	61.8	TP
17	Squat	70	140	1	5	0.684911	0.68	69.0703	64.6	TP
17	Squat	90	180	1	1	0.520382	0.53	62.7666	60	TP
17	Squat	90	180	1	2	0.452436	0.48	65.1111	61.6	TP
17	Squat	90	180	1	3	0.420411	0.43	67.8864	64.1	TP
17	Squat	100	200	1	1	0.287309	0.35	66.0142	65.9	TP
18	Squat	25	15	1	1	0.877585	1.17	45.9779	47.4	TP
18	Squat	25	15	1	2	0.847433	1.07	45.1821	48.5	TP
18	Squat	25	15	1	3	0.806943	1.02	44.0684	45	TP
18	Squat	25	15	1	4	0.850554	1.06	47.3466	47.9	TP
18	Squat	25	15	1	5	0.833127	1.12	47.74	49.4	TP
18	Squat	50	18	1	1	0.800208	0.9	49.6506	50.1	TP
18	Squat	50	18	1	2	0.820716	0.95	51.6099	52.1	TP
18	Squat	50	18	1	3	0.751603	0.84	47.8989	46.7	TP
18	Squat	50	18	1	4	0.693258	0.78	46.7179	46.6	TP
18	Squat	50	18	1	5	0.757078	0.87	48.1721	48.8	TP
18	Squat	70	30	1	1	0.713392	0.83	47.6645	49.2	TP
18	Squat	70	30	1	2	0.6723	0.76	46.8636	47.3	TP
18	Squat	70	30	1	3	0.64319	0.76	45.6681	47.1	TP
18	Squat	70	30	1	4	0.625607	0.75	46.9626	46.8	TP
18	Squat	70	30	1	5	0.6385	0.73	47.1387	48.6	TP
18	Squat	90	40	1	1	0.53845	0.69	43.3016	47.1	TP
18	Squat	90	40	1	2	0.47591	0.65	38.5415	40.2	TP
18	Squat	90	40	1	3	0.438517	0.57	39.0665	39	TP
18	Squat	100	45	1	1	0.32994	0.41	37.6959	38.6	TP
19	Squat	25	15	1	1	0.906608	1	49.5827	52	TP
19	Squat	25	15	1	2	0.898481	1.07	48.393	49.3	TP
19	Squat	25	15	1	3	0.98892	1.17	52.1307	53.3	TP
19	Squat	25	15	1	4	1.0146	1.13	53.0804	53.2	TP
19	Squat	25	15	1	5	0.975382	1.1	52.9382	51.4	TP
19	Squat	50	18	1	1	0.627633	0.98	50.7203	55.1	TP
19	Squat	50	18	1	2	0.69496	0.79	52.1172	51.4	TP
19	Squat	50	18	1	3	0.891693	1.01	56.3422	56.4	TP
19	Squat	50	18	1	4	0.885865	0.96	56.9144	54.8	TP
19	Squat	50	18	1	5	0.785888	0.86	55.7013	55.7	TP
19	Squat	70	30	1	1	0.398121	0.54	48.47	50.9	TP
19	Squat	70	30	1	2	0.510189	0.66	50.2598	48.5	TP
19	Squat	70	30	1	3	0.592559	0.72	50.3398	52.4	TP
19	Squat	70	30	1	4	0.675675	0.77	50.5551	50.2	TP
19	Squat	70	30	1	5	0.516461	0.78	51.3837	53.2	TP
19	Squat	90	40	1	1	0.265968	0.41	52.2816	52.9	TP
19	Squat	90	40	1	2	0.285927	0.45	52.9391	53.6	TP
19	Squat	90	40	1	3	0.263372	0.41	51.1638	52.3	TP
19	Squat	100	45	1	1	0.269597	0.3	54.9222	56.4	TP
20	Squat	25	28	1	1	1.05086	1.28	57.5877	59.7	TP
20	Squat	25	28	1	2	1.02602	1.2	54.2669	56.9	TP
20	Squat	25	28	1	3	0.951268	1.1	61.0802	67.3	TP
20	Squat	25	28	1	4	1.0033	1.16	59.3045	59.9	TP
20	Squat	25	28	1	5	1.0386	1.3	60.0248	62.2	TP
20	Squat	50	55	1	1	0.900225	1.15	55.0272	57.1	TP
20	Squat	50	55	1	2	0.911041	1.03	61.0017	62.7	TP
20	Squat	50	55	1	3	0.894879	1.05	56.2101	57.8	TP
20	Squat	50	55	1	4	0.830631	1.01	55.8956	58.4	TP
20	Squat	50	55	1	5	0.887803	1.04	61.5308	62.3	TP
20	Squat	70	77	1	1	0.729421	0.93	51.6312	54.4	TP
20	Squat	70	77	1	2	0.690149	0.89	55.7539	55.8	TP
20	Squat	70	77	1	3	0.644575	0.82	54.3625	54.3	TP
20	Squat	70	77	1	4	0.653868	0.73	56.5966	56.8	TP
20	Squat	70	77	1	5	0.584479	0.71	52.5235	51.3	TP
20	Squat	90	100	1	1	0.292016	0.31	47.4033	43.3	TP
20	Squat	90	100	1	2	0.259996	0.29	45.4295	45.4	TP
20	Squat	90	100	1	3	0.261458	0.3	45.5459	44.7	TP
20	Squat	100	110	1	1	0.25098	0.38	46.7964	46.8	TP
21	Squat	25	28	1	1	0.994523		57.9457		Error
21	Squat	25	28	1	2	0.917987		57.1614		Error
21	Squat	25	28	1	3	0.948929		59.0348		Error
21	Squat	25	28	1	4	0.922521		57.6276		Error
21	Squat	25	28	1	5	0.915422		57.8181		Error
21	Squat	50	55	1	1	0.826266		57.7512		Error
21	Squat	50	55	1	2	0.826509		57.9918		Error
21	Squat	50	55	1	3	0.778762		54.6977		Error
21	Squat	50	55	1	4	0.752049		54.485		Error
21	Squat	50	55	1	5	0.737363		54.8331		Error
21	Squat	70	77	1	1	0.702644		57.205		Error
21	Squat	70	77	1	2	0.653005		56.6562		Error
21	Squat	70	77	1	3	0.624289		51.6709		Error
21	Squat	70	77	1	4	0.595983		53.5477		Error
21	Squat	70	77	1	5	0.579173		55.8234		Error
21	Squat	90	95	1	1	0.563794		56.8997		Error
21	Squat	90	95	1	2	0.497838		56.9075		Error
21	Squat	90	95	1	3	0.482403		55.9919		Error
21	Squat	100	110	1	1	0.470857		51.3131		Error
22	Squat	25	28	1	1	1.00202	1.01	55.1174	52.7	TP
22	Squat	25	28	1	2	1.0178	1.02	58.0848	54.8	TP
22	Squat	25	28	1	3	0.877217	0.88	59.3219	57.4	TP
22	Squat	25	28	1	4	1.05113	1.04	57.684	54.1	TP
22	Squat	25	28	1	5	0.935302	0.97	57.7953	57.2	TP
22	Squat	50	55	1	1	0.871727	0.89	51.5566	49.2	TP
22	Squat	50	55	1	2	0.852572	0.86	54.9998	52.1	TP
22	Squat	50	55	1	3	0.795611	0.79	55.8747	50.7	TP
22	Squat	50	55	1	4	0.796317	0.81	57.2456	53	TP
22	Squat	50	55	1	5	0.793896	0.78	56.36	52.2	TP
22	Squat	70	77	1	1	0.719192	0.75	48.1477	45.4	TP
22	Squat	70	77	1	2	0.706835	0.71	50.1612	45.1	TP
22	Squat	70	77	1	3	0.666657	0.67	51.3607	47.6	TP
22	Squat	70	77	1	4	0.641891	0.65	51.6524	47.5	TP
22	Squat	70	77	1	5	0.679251	0.66	53.8041	49.4	TP
22	Squat	90	95	1	1	0.595484	0.6	47.0252	43.5	TP
22	Squat	90	95	1	2	0.50763	0.52	50.6617	46.6	TP
22	Squat	90	95	1	3	0.545106	0.54	52.4826	48.6	TP
22	Squat	100	110	1	1	0.537739	0.52	51.2062	45	TP
23	Squat	25	28	1	1	1.00523	1.03	60.8528	58.7	TP
23	Squat	25	28	1	2	1.02945	1.08	61.3223	59.9	TP
23	Squat	25	28	1	3	1.04296	1.04	60.4193	57.5	TP
23	Squat	25	28	1	4	1.11319	1.14	61.6009	59.3	TP
23	Squat	25	28	1	5	1.08265	1.1	62.8817	60.7	TP
23	Squat	50	58	1	1	0.850581	0.85	57.4805	54.4	TP
23	Squat	50	58	1	2	0.831623	0.83	57.5762	54.2	TP
23	Squat	50	58	1	3	0.84542	0.86	58.4773	56.7	TP
23	Squat	50	58	1	4	0.827231	0.81	58.4117	54.8	TP
23	Squat	50	58	1	5	0.83856	0.83	60.9877	57.1	TP
23	Squat	70	80	1	1	0.729655	0.72	58.7471	54.3	TP
23	Squat	70	80	1	2	0.677163	0.68	57.7167	54.9	TP
23	Squat	70	80	1	3	0.641539	0.64	53.7547	50.8	TP
23	Squat	70	80	1	4	0.665046	0.67	57.7315	54.7	TP
23	Squat	70	80	1	5	0.650419	0.65	59.2642	54.8	TP
23	Squat	90	103	1	1	0.504561	0.5	59.115	55.7	TP
23	Squat	90	103	1	2	0.47338	0.48	58.8595	55.7	TP
23	Squat	90	103	1	3	0.4702	0.46	59.9141	55.9	TP
23	Squat	100	115	1	1	0.358149	0.36	60.1465	56.5	TP
24	Squat	25	25	1	1	0.966368	1.02	58.5686	56.9	TP
24	Squat	25	25	1	2	1.001	1.14	59.2139	59.3	TP
24	Squat	25	25	1	3	0.996268	1.01	62.7967	62.5	TP
24	Squat	25	25	1	4	0.972933	1.04	61.8549	61.3	TP
24	Squat	25	25	1	5	0.997519	1.04	62.593	61.6	TP
24	Squat	50	45	1	1	0.75492	0.8	55.8976	55.5	TP
24	Squat	50	45	1	2	0.840343	0.9	57.6939	57.5	TP
24	Squat	50	45	1	3	0.835647	0.93	60.8661	60.9	TP
24	Squat	50	45	1	4	0.810795	0.85	57.7606	54.5	TP
24	Squat	50	45	1	5	0.748998	0.77	63.0512	60.6	TP
24	Squat	70	63	1	1	0.664577	0.68	58.8845	58.5	TP
24	Squat	70	63	1	2	0.647249	0.68	59.104	59.4	TP
24	Squat	70	63	1	3	0.611743	0.63	60.8267	60.7	TP
24	Squat	70	63	1	4	0.643637	0.64	60.7539	58.4	TP
24	Squat	70	63	1	5	0.630449	0.62	60.7087	56.4	TP
24	Squat	90	80	1	1	0.540144	0.57	45.27	44.6	TP
24	Squat	90	80	1	2	0.527205	0.54	49.9788	49.4	TP
24	Squat	90	80	1	3	0.555103	0.58	49.3198	48.7	TP
24	Squat	100	90	1	1	0.384797	0.39	55.5087	53.3	TP
1	Squat	25	15	2	1	0.882561	1.13	55.5344	59.3	TP
1	Squat	25	15	2	2	0.804045	1.08	57.5789	59.4	TP
1	Squat	25	15	2	3	0.737831	0.99	60.3321	61.5	TP
1	Squat	25	15	2	4	0.787147	0.97	59.1487	61.7	TP
1	Squat	25	15	2	5	0.710708	0.89	60.2796	61.9	TP
1	Squat	50	30	2	1	0.763842	0.88	55.4876	55.8	TP
1	Squat	50	30	2	2	0.639708	0.85	55.6217	57	TP
1	Squat	50	30	2	3	0.622586	0.77	52.5204	51.6	TP
1	Squat	50	30	2	4	0.681151	0.83	56.9383	57.6	TP
1	Squat	50	30	2	5	0.629146	0.78	55.8897	56.3	TP
1	Squat	70	42	2	1	0.650933	0.84	53.6285	57.6	TP
1	Squat	70	42	2	2	0.612957	0.77	53.75	58.1	TP
1	Squat	70	42	2	3	0.624136	0.77	55.24	57.6	TP
1	Squat	70	42	2	4	0.57632	0.73	53.5034	58.2	TP
1	Squat	70	42	2	5	0.542568	0.61	54.5286	60.2	TP
1	Squat	90	53	2	1	0.551932	0.68	55.4635	59.3	TP
1	Squat	90	53	2	2	0.454525	0.63	51.4619	56.6	TP
1	Squat	90	53	2	3	0.449482	0.55	52.7494	59.9	TP
1	Squat	100	60	2	1	0.298055	0.48	50.6309	52.9	TP
2	Squat	25	18	2	1	1.05044	1.21	52.5337	52.5	TP
2	Squat	25	18	2	2	1.02271	1.25	50.0292	50.7	TP
2	Squat	25	18	2	3	1.18536	1.37	51.23	52	TP
2	Squat	25	18	2	4	1.18853	1.48	50.8833	52.3	TP
2	Squat	25	18	2	5	1.17116	1.39	51.5559	53.3	TP
2	Squat	50	38	2	1	0.858461	1.02	57.7768	55.7	TP
2	Squat	50	38	2	2	0.881238	1.02	56.6186	54.7	TP
2	Squat	50	38	2	3	0.89857	1.05	56.8498	56.8	TP
2	Squat	50	38	2	4	0.914079	1	55.4056	56.1	TP
2	Squat	50	38	2	5	0.932193	1.08	54.1829	54.4	TP
2	Squat	70	52	2	1	0.793862	0.87	55.4226	57.1	TP
2	Squat	70	52	2	2	0.80158	0.94	56.3507	60.1	TP
2	Squat	70	52	2	3	0.789125	0.87	56.4802	59.4	TP
2	Squat	70	52	2	4	0.793098	0.93	57.3565	60.4	TP
2	Squat	70	52	2	5	0.805217	0.97	56.0846	59.8	TP
2	Squat	90	68	2	1	0.675591	0.79	56.3461	54.2	TP
2	Squat	90	68	2	2	0.734409	0.92	52.9507	51.5	TP
2	Squat	90	68	2	3	0.652765	0.88	57.4188	60.5	TP
2	Squat	100	75	2	1	0.251669	0.33	52.6429	50.9	TP
3	Squat	25	15	2	1	0.496385	0.6	46.1226	48	TP
3	Squat	25	15	2	2	0.703039	0.78	49.9288	48.7	TP
3	Squat	25	15	2	3	0.756813	0.81	49.7773	50.2	TP
3	Squat	25	15	2	4	0.698454	0.85	53.1196	52.7	TP
3	Squat	25	15	2	5	0.739875	1	55.2657	55	TP
3	Squat	50	32	2	1	0.655368	0.79	43.4857	40.4	TP
3	Squat	50	32	2	2	0.6717	0.77	42.2246	39.5	TP
3	Squat	50	32	2	3	0.590034	0.73	40.6378	39.6	TP
3	Squat	50	32	2	4	0.59062	0.7	41.7037	39.7	TP
3	Squat	50	32	2	5	0.620224	0.71	41.1811	38.7	TP
3	Squat	70	45	2	1	0.520804	0.76	37.1555	37.1	TP
3	Squat	70	45	2	2	0.438437	0.64	38.6956	38.6	TP
3	Squat	70	45	2	3	0.494045	0.72	37.2319	38.1	TP
3	Squat	70	45	2	4	0.464316	0.66	37.7339	38.6	TP
3	Squat	70	45	2	5	0.446139	0.69	38.0338	40.4	TP
3	Squat	90	57	2	1	0.526142	0.76	35.6024	36	TP
3	Squat	90	57	2	2	0.448822	0.61	37.396	37	TP
3	Squat	90	57	2	3	0.424628	0.56	39.8014	38.8	TP
3	Squat	100	63	2	1	0.384044	0.56	34.3961	33.1	TP
4	Squat	25	22	2	1	0.695895	0.91	53.426	55.9	TP
4	Squat	25	22	2	2	0.759269	0.9	56.8088	58.9	TP
4	Squat	25	22	2	3	0.818088	0.99	56.6138	59.5	TP
4	Squat	25	22	2	4	0.793857	0.97	56.9793	58.3	TP
4	Squat	25	22	2	5	0.653443	1.01	55.8029	57.6	TP
4	Squat	50	42	2	1	0.74	0.92	49.82	55	TP
4	Squat	50	42	2	2	0.74	0.94	52.18	57.4	TP
4	Squat	50	42	2	3	0.73	0.89	52.54	57.3	TP
4	Squat	50	42	2	4	0.73	0.89	52.39	56	TP
4	Squat	50	42	2	5	0.73	0.87	52.38	55.1	TP
4	Squat	70	60	2	1	0.629008	0.7	46.7742	47.4	TP
4	Squat	70	60	2	2	0.5858	0.65	50.6181	50.6	TP
4	Squat	70	60	2	3	0.589648	0.65	52.3576	52.9	TP
4	Squat	70	60	2	4	0.596855	0.68	50.9497	51.4	TP
4	Squat	70	60	2	5	0.580732	0.65	51.7619	52.2	TP
4	Squat	90	77	2	1	0.495015	0.71	43.9209	47.5	TP
4	Squat	90	77	2	2	0.456521	0.61	48.1182	48.2	TP
4	Squat	90	77	2	3	0.398466	0.48	50.6018	52.7	TP
4	Squat	100	85	2	1	0.323134	0.46	49.2848	52	TP
5	Squat	25	40	2	1	1.11147	1.31	63.3572	68	TP
5	Squat	25	40	2	2	1.10056	1.29	63.3887	67.5	TP
5	Squat	25	40	2	3	1.11016	1.36	63.5264	67.4	TP
5	Squat	25	40	2	4	1.07331	1.18	64.1147	66.3	TP
5	Squat	25	40	2	5	1.18268	1.37	67.1489	68.8	TP
5	Squat	50	78	2	1	0.90818	1.2	64.8005	67	TP
5	Squat	50	78	2	2	0.876887	1.09	65.3685	66.8	TP
5	Squat	50	78	2	3	0.909705	1.16	64.409	66	TP
5	Squat	50	78	2	4	0.90737	1.06	64.5549	66.4	TP
5	Squat	50	78	2	5	0.862934	0.98	66.6815	69.7	TP
5	Squat	70	108	2	1	0.782012	0.92	63.9204	66.5	TP
5	Squat	70	108	2	2	0.749922	0.81	67.5321	68.4	TP
5	Squat	70	108	2	3	0.769455	0.93	65.8444	65.7	TP
5	Squat	70	108	2	4	0.748357	0.91	64.231	65.8	TP
5	Squat	70	108	2	5	0.770126	0.9	65.325	67.5	TP
5	Squat	90	140	2	1	0.592519	0.67	67.4243	66.6	TP
5	Squat	90	140	2	2	0.545659	0.59	69.7402	67.6	TP
5	Squat	90	140	2	3	0.485091	0.57	66.9818	66.7	TP
5	Squat	100	155	2	1	0.511752	0.6	67.8341	67.3	TP
6	Squat	25	15	2	1	0.788835	0.94	54.3626	55.8	TP
6	Squat	25	15	2	2	0.822044	1.03	57.0222	60.1	TP
6	Squat	25	15	2	3	0.818831	0.92	57.4974	61.4	TP
6	Squat	25	15	2	4	0.813836	0.94	60.1266	61.8	TP
6	Squat	25	15	2	5	0.801625	0.95	62.1208	63.8	TP
6	Squat	50	28	2	1	0.614361	0.71	52.9297	53.8	TP
6	Squat	50	28	2	2	0.676008	0.8	53.1945	54.5	TP
6	Squat	50	28	2	3	0.66928	0.81	53.7445	54.8	TP
6	Squat	50	28	2	4	0.641045	0.84	54.2177	55.6	TP
6	Squat	50	28	2	5	0.621343	0.76	55.8559	58.5	TP
6	Squat	70	38	2	1	0.564678	0.68	53.7972	51.3	TP
6	Squat	70	38	2	2	0.56025	0.69	51.54	51.1	TP
6	Squat	70	38	2	3	0.560015	0.68	53.9897	53.7	TP
6	Squat	70	38	2	4	0.576419	0.71	55.196	56.3	TP
6	Squat	70	38	2	5	0.547237	0.66	54.322	52.9	TP
6	Squat	90	50	2	1	0.417127	0.5	49.5066	55	TP
6	Squat	90	50	2	2	0.424572	0.48	49.502	54	TP
6	Squat	90	50	2	3	0.375691	0.44	50.5524	54.5	TP
6	Squat	100	55	2	1	0.424991	0.57	50.3052	53	TP
7	Squat	25	28	2	1	0.951371	1.03	58.8989	54.8	TP
7	Squat	25	28	2	2	0.996863	1.11	64.1016	62.1	TP
7	Squat	25	28	2	3	1.01384	1.07	64.1131	61.8	TP
7	Squat	25	28	2	4	1.00187	1.21	64.8392	64.9	TP
7	Squat	25	28	2	5	0.964578	1.06	65.0259	64.6	TP
7	Squat	50	55	2	1	0.763744	0.97	56.2726	55.7	TP
7	Squat	50	55	2	2	0.743838	0.83	52.0522	53.6	TP
7	Squat	50	55	2	3	0.761612	0.94	55.9103	59	TP
7	Squat	50	55	2	4	0.738533	1	56.0693	56	TP
7	Squat	50	55	2	5	0.585125	0.67	56.3983	55.7	TP
7	Squat	70	77	2	1	0.594078	0.69	52.3413	51.4	TP
7	Squat	70	77	2	2	0.602798	0.62	50.4463	49	TP
7	Squat	70	77	2	3	0.57382	0.71	49.4728	46.7	TP
7	Squat	70	77	2	4	0.572995	0.7	49.2448	48.6	TP
7	Squat	70	77	2	5	0.551512	0.64	49.8925	48.3	TP
7	Squat	90	98	2	1	0.461282	0.54	45.6633	45.9	TP
7	Squat	90	98	2	2	0.416162	0.53	44.7188	43	TP
7	Squat	90	98	2	3	0.412745	0.52	44.7226	44.5	TP
7	Squat	100	110	2	1	0.395197	0.6	43.6692	42.9	TP
8	Squat	25	20	2	1	0.84454	1.04	52.2296	53.4	TP
8	Squat	25	20	2	2	0.785306	0.94	51.6331	52.9	TP
8	Squat	25	20	2	3	0.890328	1.06	57.5233	57.9	TP
8	Squat	25	20	2	4	0.888069	0.97	55.6579	53.3	TP
8	Squat	25	20	2	5	0.957104	1.1	57.8985	57.4	TP
8	Squat	50	40	2	1	0.784013	0.96	52.8027	55.3	TP
8	Squat	50	40	2	2	0.761644	0.95	53.7841	57	TP
8	Squat	50	40	2	3	0.771314	0.93	57.8072	62.9	TP
8	Squat	50	40	2	4	0.794143	0.97	56.4051	60.4	TP
8	Squat	50	40	2	5	0.746397	0.9	54.7633	57.6	TP
8	Squat	70	55	2	1	0.664146	0.77	51.6186	49.5	TP
8	Squat	70	55	2	2	0.661799	0.81	54.2321	52.8	TP
8	Squat	70	55	2	3	0.668626	0.81	54.8014	55.9	TP
8	Squat	70	55	2	4	0.655137	0.78	54.302	56.7	TP
8	Squat	70	55	2	5	0.646853	0.82	54.0949	59.4	TP
8	Squat	90	72	2	1	0.513388	0.67	48.9043	52.2	TP
8	Squat	90	72	2	2	0.527849	0.66	51.2337	55.2	TP
8	Squat	90	72	2	3	0.481808	0.65	51.3222	56.7	TP
8	Squat	100	80	2	1	0.261092	0.31	46.196	45.6	TP
9	Squat	25	22	2	1	0.884229	1.07	52.0898	55.1	TP
9	Squat	25	22	2	2	0.697538	0.85	49.3984	49.7	TP
9	Squat	25	22	2	3	0.771066	0.9	49.5645	50.1	TP
9	Squat	25	22	2	4	0.788711	0.9	52.6709	53.1	TP
9	Squat	25	22	2	5	0.81068	0.96	53.4701	50.8	TP
9	Squat	50	42	2	1	0.594411	0.56	44.9249	45.9	TP
9	Squat	50	42	2	2	0.599646	0.71	46.0323	48.8	TP
9	Squat	50	42	2	3	0.601116	0.69	44.9854	47.4	TP
9	Squat	50	42	2	4	0.579878	0.73	44.936	47.1	TP
9	Squat	50	42	2	5	0.521933	0.63	46.7601	46.9	TP
9	Squat	70	60	2	1	0.528844	0.61	42.8732	41.1	TP
9	Squat	70	60	2	2	0.498796	0.65	45.8679	46.8	TP
9	Squat	70	60	2	3	0.499412	0.62	43.5897	40.3	TP
9	Squat	70	60	2	4	0.436982	0.55	43.7994	43.8	TP
9	Squat	70	60	2	5	0.443473	0.53	42.3526	42.2	TP
9	Squat	90	77	2	1	0.399268	0.5	38.5088	38.4	TP
9	Squat	90	77	2	2	0.377107	0.56	41.0492	38.7	TP
9	Squat	90	77	2	3	0.376873	0.42	38.8894	38.4	TP
9	Squat	100	85	2	1	0.405071	0.57	39.4963	35.8	TP
10	Squat	25	22	2	1	0.857554	0.99	47.4242	46.3	TP
10	Squat	25	22	2	2	0.871685	1.08	50.4478	51.9	TP
10	Squat	25	22	2	3	0.917504	1.03	51.0716	51.5	TP
10	Squat	25	22	2	4	0.839747	0.85	49.2189	48.7	TP
10	Squat	25	22	2	5	0.914235	1	52.8861	52.6	TP
10	Squat	50	43	2	1	0.778909	0.89	48.0595	49.6	TP
10	Squat	50	43	2	2	0.740994	0.88	47.8759	48.1	TP
10	Squat	50	43	2	3	0.747814	0.84	50.9287	50.8	TP
10	Squat	50	43	2	4	0.718877	0.78	52.914	52.5	TP
10	Squat	50	43	2	5	0.658389	0.73	52.1763	53.6	TP
10	Squat	70	60	2	3	0.545512	0.64	44.4381	45.6	TP
10	Squat	70	60	2	4	0.49593	0.57	47.085	47.5	TP
10	Squat	70	60	2	5	0.480409	0.57	49.7682	50	TP
10	Squat	70	60	2	6	0.49646	0.65	48.8752	48.7	TP
10	Squat	90	77	2	1	0.468643	0.54	41.2569	38.5	TP
10	Squat	90	77	2	2	0.418319	0.61	46.4384	44	TP
10	Squat	90	77	2	3	0.3145	0.48	42.4531	43.5	TP
10	Squat	100	85	2	1	0.360341	0.46	46.1945	43.5	TP
11	Squat	25	30	2	1	1.11446	1.27	68.03	69.2	TP
11	Squat	25	30	2	2	1.14228	1.27	69.2446	70.4	TP
11	Squat	25	30	2	3	1.14688	1.27	70.8842	71	TP
11	Squat	25	30	2	4	1.16363	1.27	72.9604	73.1	TP
11	Squat	25	30	2	5	1.1806	1.28	74.0864	73.9	TP
11	Squat	50	60	2	1	0.995284	1.06	71.5972	71.3	TP
11	Squat	50	60	2	2	1.00934	1.1	74.578	75.8	TP
11	Squat	50	60	2	3	1.01269	1.1	76.7169	76.9	TP
11	Squat	50	60	2	4	0.998795	1.09	77.6947	77.6	TP
11	Squat	50	60	2	5	0.999967	1.1	77.4639	77.6	TP
11	Squat	70	82	2	1	0.835799	0.89	75.6951	76.3	TP
11	Squat	70	82	2	2	0.769841	0.82	74.5027	75.2	TP
11	Squat	70	82	2	3	0.800906	0.85	73.9317	73.4	TP
11	Squat	70	82	2	4	0.74836	0.75	76.3785	75.3	TP
11	Squat	70	82	2	5	0.730285	0.77	77.6125	78.1	TP
11	Squat	90	105	2	1	0.606548	0.63	75.0486	76	TP
11	Squat	90	105	2	2	0.522677	0.64	77.5292	79.5	TP
11	Squat	90	105	2	3	0.456695	0.53	77.1646	78	TP
11	Squat	100	115	2	1	0.29144	0.36	75.6281	58.6	TP
12	Squat	25	25	2	1	0.736259	0.88	52.4851	56.1	TP
12	Squat	25	25	2	2	0.836704	1.02	60.115	61.8	TP
12	Squat	25	25	2	3	0.808288	0.94	59.0599	61	TP
12	Squat	25	25	2	4	0.797892	0.9	60.1054	61.3	TP
12	Squat	25	25	2	5	0.794173	0.91	63.0913	64.4	TP
12	Squat	50	50	2	1	0.689149	0.91	51.8347	56.8	TP
12	Squat	50	50	2	2	0.705055	0.82	55.3695	58.8	TP
12	Squat	50	50	2	3	0.655574	0.77	56.9511	59	TP
12	Squat	50	50	2	4	0.682672	0.81	57.756	60.1	TP
12	Squat	50	50	2	5	0.652676	0.78	59.0696	61.7	TP
12	Squat	70	75	2	1	0.555219	0.73	52.2876	53.2	TP
12	Squat	70	75	2	2	0.539009	0.66	52.6389	51.5	TP
12	Squat	70	75	2	3	0.529846	0.69	52.5287	53.6	TP
12	Squat	70	75	2	4	0.509116	0.62	55.7551	57.6	TP
12	Squat	70	75	2	5	0.48376	0.56	55.2323	55.5	TP
12	Squat	90	90	2	1	0.353512	0.44	53.9235	53.8	TP
12	Squat	90	90	2	2	0.371631	0.43	51.8409	50.6	TP
12	Squat	90	90	2	3	0.378881	0.51	50.3856	49.7	TP
12	Squat	100	100	2	1	0.315475	0.47	47.0214	48.3	TP
13	Squat	25	28	2	1	1.14149	1.26	63.331	61.9	TP
13	Squat	25	28	2	2	1.21221	1.36	70.7194	70	TP
13	Squat	25	28	2	3	1.24203	1.31	77.7185	75.6	TP
13	Squat	25	28	2	4	1.2601	1.3	81.1329	76.8	TP
13	Squat	25	28	2	5	1.29347	1.41	82.7932	79.5	TP
13	Squat	50	55	2	1	0.998044	1.08	76.3401	69.7	TP
13	Squat	50	55	2	2	1.03083	1.09	78.9452	76.2	TP
13	Squat	50	55	2	3	1.0083	1.14	79.9604	76.5	TP
13	Squat	50	55	2	4	0.941435	1.17	80.3514	77.6	TP
13	Squat	50	55	2	5	0.960074	1.06	81.8047	80.8	TP
13	Squat	70	77	2	1	0.844099	0.95	73.7256	72.8	TP
13	Squat	70	77	2	2	0.807994	0.88	74.7799	73.4	TP
13	Squat	70	77	2	3	0.740119	0.86	75.3234	72	TP
13	Squat	70	77	2	4	0.782504	0.81	77.8761	68.1	TP
13	Squat	70	77	2	5	0.740593	0.87	78.0742	75.8	TP
13	Squat	90	97	2	1	0.635073	0.71	63.9535	60	TP
13	Squat	90	97	2	2	0.619533	0.73	68.6062	67.2	TP
13	Squat	90	97	2	3	0.583609	0.65	70.1335	68.1	TP
13	Squat	100	110	2	1	0.505085	0.68	65.8509	64.4	TP
14	Squat	25	28	2	1	0.923977	1.01	49.0507	48	TP
14	Squat	25	28	2	2	0.936213	1.05	50.6839	51.7	TP
14	Squat	25	28	2	3	0.951876	1.09	55.3675	56.8	TP
14	Squat	25	28	2	4	0.910761	1.05	57.6776	59.6	TP
14	Squat	25	28	2	5	0.929223	1.1	59.0311	61.3	TP
14	Squat	50	55	2	1	0.784763	1.02	52.3927	52.7	TP
14	Squat	50	55	2	2	0.74311	0.87	56.3687	53.7	TP
14	Squat	50	55	2	3	0.798575	0.9	57.9873	60.2	TP
14	Squat	50	55	2	4	0.777344	0.9	57.4198	60	TP
14	Squat	50	55	2	5	0.698806	0.81	57.1128	60.1	TP
14	Squat	70	77	2	1	0.64174	0.77	51.6896	50.7	TP
14	Squat	70	77	2	2	0.650219	0.52	54.618	51.5	TP
14	Squat	70	77	2	3	0.609666	0.57	55.3878	56.7	TP
14	Squat	70	77	2	4	0.628415	0.75	57.4348	58.3	TP
14	Squat	70	77	2	5	0.541223	0.64	59.5454	60.8	TP
14	Squat	90	95	2	1	0.539521	0.67	52.4001	52.5	TP
14	Squat	90	95	2	2	0.47767	0.62	55.5962	56.1	TP
14	Squat	90	95	2	3	0.440586	0.56	55.3497	59	TP
14	Squat	100	110	2	1	0.371261	0.46	55.7758	58	TP
15	Squat	25	35	2	1	1.10692	1.27	56.7534	58	TP
15	Squat	25	35	2	2	1.19002	1.45	65.3087	65.2	TP
15	Squat	25	35	2	3	1.24118	1.41	70.7262	72.5	TP
15	Squat	25	35	2	4	1.21069	1.55	71.0666	48.8	TP
15	Squat	25	35	2	5	1.18086	1.58	73.9022	45.7	TP
15	Squat	50	70	2	1	0.933745	1.03	65.101	65.2	TP
15	Squat	50	70	2	2	0.898963	0.97	66.6999	66.2	TP
15	Squat	50	70	2	3	0.914055	1.05	69.4757	69.1	TP
15	Squat	50	70	2	4	0.90243	0.96	69.3749	67.8	TP
15	Squat	50	70	2	5	0.92733	1	68.6429	68.8	TP
15	Squat	70	98	2	1	0.757382	0.84	70.2806	70	TP
15	Squat	70	98	2	2	0.751772	0.9	70.3098	72.2	TP
15	Squat	70	98	2	3	0.652333	0.7	69.5188	69.8	TP
15	Squat	70	98	2	4	0.633109	0.71	71.6119	69.5	TP
15	Squat	70	98	2	5	0.635352	0.74	71.3425	70.1	TP
15	Squat	90	125	2	1	0.560495	0.59	72.8416	72.1	TP
15	Squat	90	125	2	2	0.509764	0.54	70.5687	69	TP
15	Squat	90	125	2	3	0.416758	0.47	72.4822	71	TP
15	Squat	100	140	2	1	0.415549	0.47	70.4632	68.7	TP
16	Squat	25	17	2	1	0.760233	0.88	42.8815	44.1	TP
16	Squat	25	17	2	2	0.829165	1.06	44.8282	47.5	TP
16	Squat	25	17	2	3	0.820597	1	45.9218	50.8	TP
16	Squat	25	17	2	4	0.822841	1.06	47.3814	50	TP
16	Squat	25	17	2	5	0.821518	0.86	47.26	49.9	TP
16	Squat	50	35	2	1	0.623593	0.72	41.664	41.5	TP
16	Squat	50	35	2	2	0.629098	0.74	43.2097	44.7	TP
16	Squat	50	35	2	3	0.636741	0.8	43.6905	46.5	TP
16	Squat	50	35	2	4	0.650259	0.79	43.3355	45.8	TP
16	Squat	50	35	2	5	0.614366	0.72	42.7356	46.4	TP
16	Squat	70	48	2	1	0.519057	0.64	40.6168	42	TP
16	Squat	70	48	2	2	0.518141	0.68	41.765	42	TP
16	Squat	70	48	2	3	0.506247	0.7	42.308	43.9	TP
16	Squat	70	48	2	4	0.502213	0.67	42.9277	45.8	TP
16	Squat	70	48	2	5	0.48827	0.71	42.5679	44.2	TP
16	Squat	90	60	2	1	0.392579	0.51	40.6479	39.6	TP
16	Squat	90	60	2	2	0.366914	0.43	41.0101	38.3	TP
16	Squat	90	60	2	3	0.347488	0.4	42.2073	41.9	TP
16	Squat	100	68	2	1	0.274921	0.34	40.8034	41.3	TP
17	Squat	25	50	2	1	1.20637	1.4	66.0511	69	TP
17	Squat	25	50	2	2	1.20619	1.44	66.2323	69.7	TP
17	Squat	25	50	2	3	1.17656	1.39	67.8761	70.6	TP
17	Squat	25	50	2	4	1.20998	1.44	69.5214	71.6	TP
17	Squat	25	50	2	5	1.21835	1.5	73.1357	74.5	TP
17	Squat	50	100	2	1	0.968956	1.05	66.3748	66	TP
17	Squat	50	100	2	2	0.969652	1.09	69.1878	69.9	TP
17	Squat	50	100	2	3	0.978765	1.1	67.091	66.6	TP
17	Squat	50	100	2	4	0.960368	1.02	69.985	65.8	TP
17	Squat	50	100	2	5	0.968	1.04	75.1699	71.6	TP
17	Squat	70	140	2	1	0.767595	0.82	66.0389	62.3	TP
17	Squat	70	140	2	2	0.701394	0.73	64.9384	61	TP
17	Squat	70	140	2	3	0.691041	0.76	64.4186	60.9	TP
17	Squat	70	140	2	4	0.662169	0.73	64.7155	63.4	TP
17	Squat	70	140	2	5	0.684911	0.75	69.0703	66.2	TP
17	Squat	90	180	2	1	0.520382	0.62	62.7666	58.3	TP
17	Squat	90	180	2	2	0.452436	0.63	65.1111	60.3	TP
17	Squat	90	180	2	3	0.420411	0.55	67.8864	65	TP
17	Squat	100	200	2	1	0.287309	0.39	66.0142	67.9	TP
18	Squat	25	15	2	1	0.877585	1.04	45.9779	50.2	TP
18	Squat	25	15	2	2	0.847433	1.21	45.1821	48.7	TP
18	Squat	25	15	2	3	0.806943	0.88	44.0684	46.4	TP
18	Squat	25	15	2	4	0.850554	1.05	47.3466	49.8	TP
18	Squat	25	15	2	5	0.833127	0.94	47.74	50.7	TP
18	Squat	50	18	2	1	0.800208	1.06	49.6506	50.5	TP
18	Squat	50	18	2	2	0.820716	1.05	51.6099	52.9	TP
18	Squat	50	18	2	3	0.751603	0.94	47.8989	47.6	TP
18	Squat	50	18	2	4	0.693258	0.88	46.7179	47.1	TP
18	Squat	50	18	2	5	0.757078	0.99	48.1721	49.4	TP
18	Squat	70	30	2	1	0.713392	0.97	47.6645	49.1	TP
18	Squat	70	30	2	2	0.6723	0.93	46.8636	47.1	TP
18	Squat	70	30	2	3	0.64319	0.85	45.6681	47	TP
18	Squat	70	30	2	4	0.625607	0.9	46.9626	47	TP
18	Squat	70	30	2	5	0.6385	0.87	47.1387	48.8	TP
18	Squat	90	40	2	1	0.53845	0.76	43.3016	46.6	TP
18	Squat	90	40	2	2	0.47591	0.65	38.5415	41.1	TP
18	Squat	90	40	2	3	0.438517	0.51	39.0665	41.2	TP
18	Squat	100	45	2	1	0.32994	0.48	37.6959	39.1	TP
19	Squat	25	15	2	1	0.906608	1.13	49.5827	54.3	TP
19	Squat	25	15	2	2	0.898481	1.19	48.393	49.7	TP
19	Squat	25	15	2	3	0.98892	1.11	52.1307	55.5	TP
19	Squat	25	15	2	4	1.0146	1.06	53.0804	56.2	TP
19	Squat	25	15	2	5	0.975382	1.17	52.9382	54	TP
19	Squat	50	18	2	1	0.627633	0.98	50.7203	56	TP
19	Squat	50	18	2	2	0.69496	0.84	52.1172	52.1	TP
19	Squat	50	18	2	3	0.891693	1.01	56.3422	55.8	TP
19	Squat	50	18	2	4	0.885865	1	56.9144	55.7	TP
19	Squat	50	18	2	5	0.785888	0.91	55.7013	55.2	TP
19	Squat	70	30	2	1	0.398121	0.63	48.47	51	TP
19	Squat	70	30	2	2	0.510189	0.76	50.2598	49	TP
19	Squat	70	30	2	3	0.592559	0.85	50.3398	49.9	TP
19	Squat	70	30	2	4	0.675675	0.94	50.5551	50.8	TP
19	Squat	70	30	2	5	0.516461	0.91	51.3837	53.4	TP
19	Squat	90	40	2	1	0.265968	0.42	52.2816	54.1	TP
19	Squat	90	40	2	2	0.285927	0.43	52.9391	55	TP
19	Squat	90	40	2	3	0.263372	0.44	51.1638	52.9	TP
19	Squat	100	45	2	1	0.269597	0.32	54.9222	56.9	TP
20	Squat	25	28	2	1	1.05086	1.44	57.5877	60.7	TP
20	Squat	25	28	2	2	1.02602	1.55	54.2669	57.7	TP
20	Squat	25	28	2	3	0.951268	1.25	61.0802	65.6	TP
20	Squat	25	28	2	4	1.0033	1.48	59.3045	58.9	TP
20	Squat	25	28	2	5	1.0386	1.25	60.0248	63.9	TP
20	Squat	50	55	2	1	0.900225	1.11	55.0272	57.7	TP
20	Squat	50	55	2	2	0.911041	1.22	61.0017	63.7	TP
20	Squat	50	55	2	3	0.894879	1.21	56.2101	58.5	TP
20	Squat	50	55	2	4	0.830631	0.94	55.8956	60.6	TP
20	Squat	50	55	2	5	0.887803	1.16	61.5308	64.5	TP
20	Squat	70	77	2	1	0.729421	0.92	51.6312	56	TP
20	Squat	70	77	2	2	0.690149	0.91	55.7539	57.8	TP
20	Squat	70	77	2	3	0.644575	0.73	54.3625	57.5	TP
20	Squat	70	77	2	4	0.653868	0.89	56.5966	58.5	TP
20	Squat	70	77	2	5	0.584479	0.67	52.5235	53.8	TP
20	Squat	90	100	2	1	0.292016	0.35	47.4033	44	TP
20	Squat	90	100	2	2	0.259996	0.32	45.4295	45.8	TP
20	Squat	90	100	2	3	0.261458	0.34	45.5459	45.3	TP
20	Squat	100	110	2	1	0.25098	0.36	46.7964	48.6	TP
21	Squat	25	28	2	1	0.994523	1.03	57.9457	57.1	TP
21	Squat	25	28	2	2	0.917987	0.94	57.1614	56.9	TP
21	Squat	25	28	2	3	0.948929	0.95	59.0348	57.3	TP
21	Squat	25	28	2	4	0.922521	0.93	57.6276	55	TP
21	Squat	25	28	2	5	0.915422	0.97	57.8181	57.1	TP
21	Squat	50	55	2	1	0.826266	0.9	57.7512	59.1	TP
21	Squat	50	55	2	2	0.826509	0.86	57.9918	57.7	TP
21	Squat	50	55	2	3	0.778762	0.82	54.6977	52.6	TP
21	Squat	50	55	2	4	0.752049	0.79	54.485	54.4	TP
21	Squat	50	55	2	5	0.737363	0.75	54.8331	51.9	TP
21	Squat	70	77	2	1	0.702644	0.75	57.205	58.2	TP
21	Squat	70	77	2	2	0.653005	0.69	56.6562	56	TP
21	Squat	70	77	2	3	0.624289	0.69	51.6709	51.2	TP
21	Squat	70	77	2	4	0.595983	0.66	53.5477	53.4	TP
21	Squat	70	77	2	5	0.579173	0.62	55.8234	55.7	TP
21	Squat	90	95	2	1	0.563794	0.58	56.8997	55.5	TP
21	Squat	90	95	2	2	0.497838	0.49	56.9075	55.6	TP
21	Squat	90	95	2	3	0.482403	0.5	55.9919	54.8	TP
21	Squat	100	110	2	1	0.470857	0.5	51.3131	51.3	TP
22	Squat	25	28	2	1	1.00202	1.03	55.1174	53.5	TP
22	Squat	25	28	2	2	1.0178		58.0848		FN
22	Squat	25	28	2	3	0.877217	0.91	59.3219	58.4	TP
22	Squat	25	28	2	4	1.05113	1.09	57.684	55.1	TP
22	Squat	25	28	2	5	0.935302	1.01	57.7953	58	TP
22	Squat	50	55	2	1	0.871727	0.97	51.5566	50.8	TP
22	Squat	50	55	2	2	0.852572	0.91	54.9998	53.3	TP
22	Squat	50	55	2	3	0.795611	0.83	55.8747	51.6	TP
22	Squat	50	55	2	4	0.796317	0.82	57.2456	54.1	TP
22	Squat	50	55	2	5	0.793896	0.8	56.36	53.6	TP
22	Squat	70	77	2	1	0.719192	0.77	48.1477	46.5	TP
22	Squat	70	77	2	2	0.706835	0.62	50.1612	44.3	TP
22	Squat	70	77	2	3	0.666657	0.74	51.3607	47.5	TP
22	Squat	70	77	2	4	0.641891	0.66	51.6524	49	TP
22	Squat	70	77	2	5	0.679251	0.67	53.8041	50.5	TP
22	Squat	90	95	2	1	0.595484	0.62	47.0252	43.9	TP
22	Squat	90	95	2	2	0.50763	0.5	50.6617	47.1	TP
22	Squat	90	95	2	3	0.545106	0.56	52.4826	49.8	TP
22	Squat	100	110	2	1	0.537739	0.52	51.2062	45.1	TP
23	Squat	25	28	2	1	1.00523	1.09	60.8528	60.2	TP
23	Squat	25	28	2	2	1.02945	1.15	61.3223	62	TP
23	Squat	25	28	2	3	1.04296	1.14	60.4193	59.4	TP
23	Squat	25	28	2	4	1.11319	1.18	61.6009	61.3	TP
23	Squat	25	28	2	5	1.08265	1.17	62.8817	62.6	TP
23	Squat	50	58	2	1	0.850581	0.93	57.4805	56.2	TP
23	Squat	50	58	2	2	0.831623	0.83	57.5762	55.5	TP
23	Squat	50	58	2	3	0.84542	0.92	58.4773	58.9	TP
23	Squat	50	58	2	4	0.827231	0.84	58.4117	56.8	TP
23	Squat	50	58	2	5	0.83856	0.86	60.9877	59	TP
23	Squat	70	80	2	1	0.729655	0.74	58.7471	55.7	TP
23	Squat	70	80	2	2	0.677163	0.7	57.7167	56.3	TP
23	Squat	70	80	2	3	0.641539	0.66	53.7547	52	TP
23	Squat	70	80	2	4	0.665046	0.68	57.7315	56.1	TP
23	Squat	70	80	2	5	0.650419	0.65	59.2642	56.2	TP
23	Squat	90	103	2	1	0.504561	0.5	59.115	56.3	TP
23	Squat	90	103	2	2	0.47338	0.47	58.8595	54.6	TP
23	Squat	90	103	2	3	0.4702	0.5	59.9141	58.6	TP
23	Squat	100	115	2	1	0.358149	0.37	60.1465	58.3	TP
24	Squat	25	25	2	1	0.966368	1.02	58.5686	58.4	TP
24	Squat	25	25	2	2	1.001	1.16	59.2139	60.4	TP
24	Squat	25	25	2	3	0.996268	1.28	62.7967	62.3	TP
24	Squat	25	25	2	4	0.972933	1.12	61.8549	65.8	TP
24	Squat	25	25	2	5	0.997519	1.06	62.593	63.8	TP
24	Squat	50	45	2	1	0.75492	0.9	55.8976	56.6	TP
24	Squat	50	45	2	2	0.840343	0.94	57.6939	59.9	TP
24	Squat	50	45	2	3	0.835647	0.92	60.8661	61.8	TP
24	Squat	50	45	2	4	0.810795	0.84	57.7606	56.5	TP
24	Squat	50	45	2	5	0.748998	0.75	63.0512	63.9	TP
24	Squat	70	63	2	1	0.664577	0.72	58.8845	60.6	TP
24	Squat	70	63	2	2	0.647249	0.67	59.104	61.5	TP
24	Squat	70	63	2	3	0.611743	0.65	60.8267	61.3	TP
24	Squat	70	63	2	4	0.643637	0.66	60.7539	60	TP
24	Squat	70	63	2	5	0.630449	0.62	60.7087	58.3	TP
24	Squat	90	80	2	1	0.540144	0.58	45.27	46	TP
24	Squat	90	80	2	2	0.527205	0.56	49.9788	50.8	TP
24	Squat	90	80	2	3	0.555103	0.61	49.3198	49.6	TP
24	Squat	100	90	2	1	0.384797	0.4	55.5087	55	TP
1	Squat	25	15	3	1	0.882561	1.17	55.5344	58.7	TP
1	Squat	25	15	3	2	0.804045	0.97	57.5789	59.3	TP
1	Squat	25	15	3	3	0.737831	0.94	60.3321	61.4	TP
1	Squat	25	15	3	4	0.787147	0.92	59.1487	61.6	TP
1	Squat	25	15	3	5	0.710708	0.85	60.2796	62.4	TP
1	Squat	50	30	3	1	0.763842	0.88	55.4876	55.4	TP
1	Squat	50	30	3	2	0.639708	0.78	55.6217	56.8	TP
1	Squat	50	30	3	3	0.622586	0.76	52.5204	51.7	TP
1	Squat	50	30	3	4	0.681151	0.81	56.9383	58.1	TP
1	Squat	50	30	3	5	0.629146	0.78	55.8897	56.4	TP
1	Squat	70	42	3	1	0.650933	0.82	53.6285	55.6	TP
1	Squat	70	42	3	2	0.612957	0.7	53.75	56	TP
1	Squat	70	42	3	3	0.624136	0.73	55.24	55.1	TP
1	Squat	70	42	3	4	0.57632	0.76	53.5034	57	TP
1	Squat	70	42	3	5	0.542568	0.72	54.5286	58.5	TP
1	Squat	90	53	3	1	0.551932	0.66	55.4635	59.1	TP
1	Squat	90	53	3	2	0.454525	0.55	51.4619	57	TP
1	Squat	90	53	3	3	0.449482	0.54	52.7494	59.9	TP
1	Squat	100	60	3	1	0.298055	0.46	50.6309	53	TP
2	Squat	25	18	3	1	1.05044	1.24	52.5337	52.5	TP
2	Squat	25	18	3	2	1.02271	1.22	50.0292	50.5	TP
2	Squat	25	18	3	3	1.18536	1.35	51.23	51.6	TP
2	Squat	25	18	3	4	1.18853	1.35	50.8833	51.9	TP
2	Squat	25	18	3	5	1.17116	1.31	51.5559	52.4	TP
2	Squat	50	38	3	1	0.858461	0.97	57.7768	56.6	TP
2	Squat	50	38	3	2	0.881238	0.95	56.6186	55.5	TP
2	Squat	50	38	3	3	0.89857	0.99	56.8498	56.1	TP
2	Squat	50	38	3	4	0.914079	1.01	55.4056	55.6	TP
2	Squat	50	38	3	5	0.932193	1.02	54.1829	54.6	TP
2	Squat	70	52	3	1	0.793862	0.92	55.4226	56.7	TP
2	Squat	70	52	3	2	0.80158	0.98	56.3507	59.5	TP
2	Squat	70	52	3	3	0.789125	0.95	56.4802	60.2	TP
2	Squat	70	52	3	4	0.793098	0.95	57.3565	60.7	TP
2	Squat	70	52	3	5	0.805217	0.99	56.0846	60.9	TP
2	Squat	90	68	3	1	0.675591	0.82	56.3461	54.3	TP
2	Squat	90	68	3	2	0.734409	0.85	52.9507	51.7	TP
2	Squat	90	68	3	3	0.652765	0.85	57.4188	60.5	TP
2	Squat	100	75	3	1	0.251669	0.32	52.6429	51	TP
3	Squat	25	15	3	1	0.496385	0.62	46.1226	47.2	TP
3	Squat	25	15	3	2	0.703039	0.83	49.9288	47.8	TP
3	Squat	25	15	3	3	0.756813	0.94	49.7773	49.1	TP
3	Squat	25	15	3	4	0.698454	0.81	53.1196	52.3	TP
3	Squat	25	15	3	5	0.739875	0.95	55.2657	54.1	TP
3	Squat	50	32	3	1	0.655368	0.76	43.4857	39.9	TP
3	Squat	50	32	3	2	0.6717	0.78	42.2246	39.1	TP
3	Squat	50	32	3	3	0.590034	0.71	40.6378	40	TP
3	Squat	50	32	3	4	0.59062	0.71	41.7037	38.5	TP
3	Squat	50	32	3	5	0.620224	0.7	41.1811	38.6	TP
3	Squat	70	45	3	1	0.520804	0.7	37.1555	36.2	TP
3	Squat	70	45	3	2	0.438437	0.59	38.6956	38.4	TP
3	Squat	70	45	3	3	0.494045	0.71	37.2319	37.3	TP
3	Squat	70	45	3	4	0.464316	0.67	37.7339	38.2	TP
3	Squat	70	45	3	5	0.446139	0.7	38.0338	39.9	TP
3	Squat	90	57	3	1	0.526142	0.75	35.6024	35.3	TP
3	Squat	90	57	3	2	0.448822	0.61	37.396	36.8	TP
3	Squat	90	57	3	3	0.424628	0.56	39.8014	38.8	TP
3	Squat	100	63	3	1	0.384044	0.54	34.3961	33.8	TP
4	Squat	25	22	3	1	0.695895	0.81	53.426	53.9	TP
4	Squat	25	22	3	2	0.759269	0.86	56.8088	57.4	TP
4	Squat	25	22	3	3	0.818088	0.94	56.6138	57.3	TP
4	Squat	25	22	3	4	0.793857	0.92	56.9793	55.9	TP
4	Squat	25	22	3	5	0.653443	0.94	55.8029	56.2	TP
4	Squat	50	42	3	1	0.74	0.85	49.82	52.6	TP
4	Squat	50	42	3	2	0.74	0.87	52.18	54.7	TP
4	Squat	50	42	3	3	0.73	0.82	52.54	56.1	TP
4	Squat	50	42	3	4	0.73	0.83	52.39	55.2	TP
4	Squat	50	42	3	5	0.73	0.83	52.38	54.5	TP
4	Squat	70	60	3	1	0.629008	0.69	46.7742	47.2	TP
4	Squat	70	60	3	2	0.5858	0.63	50.6181	49.5	TP
4	Squat	70	60	3	3	0.589648	0.64	52.3576	52.1	TP
4	Squat	70	60	3	4	0.596855	0.66	50.9497	50.8	TP
4	Squat	70	60	3	5	0.580732	0.65	51.7619	50.9	TP
4	Squat	90	77	3	1	0.495015	0.64	43.9209	46.1	TP
4	Squat	90	77	3	2	0.456521	0.55	48.1182	47.5	TP
4	Squat	90	77	3	3	0.398466	0.47	50.6018	52.1	TP
4	Squat	100	85	3	1	0.323134	0.41	49.2848	50.8	TP
5	Squat	25	40	3	1	1.11147	1.24	63.3572	64.3	TP
5	Squat	25	40	3	2	1.10056	1.25	63.3887	64.7	TP
5	Squat	25	40	3	3	1.11016	1.23	63.5264	63.9	TP
5	Squat	25	40	3	4	1.07331	1.2	64.1147	63.9	TP
5	Squat	25	40	3	5	1.18268	1.28	67.1489	66.5	TP
5	Squat	50	78	3	1	0.90818	1.05	64.8005	65	TP
5	Squat	50	78	3	2	0.876887	1.04	65.3685	64.7	TP
5	Squat	50	78	3	3	0.909705	1.01	64.409	64.7	TP
5	Squat	50	78	3	4	0.90737	1.03	64.5549	63.6	TP
5	Squat	50	78	3	5	0.862934	0.98	66.6815	66.2	TP
5	Squat	70	108	3	1	0.782012	0.85	63.9204	64.9	TP
5	Squat	70	108	3	2	0.749922	0.9	67.5321	65.4	TP
5	Squat	70	108	3	3	0.769455	0.95	65.8444	63.9	TP
5	Squat	70	108	3	4	0.748357	0.93	64.231	63.3	TP
5	Squat	70	108	3	5	0.770126	0.97	65.325	64.9	TP
5	Squat	90	140	3	1	0.592519	0.64	67.4243	63.8	TP
5	Squat	90	140	3	2	0.545659	0.57	69.7402	66	TP
5	Squat	90	140	3	3	0.485091	0.53	66.9818	65.6	TP
5	Squat	100	155	3	1	0.511752	0.57	67.8341	67	TP
6	Squat	25	15	3	1	0.788835	0.93	54.3626	53.4	TP
6	Squat	25	15	3	2	0.822044	1	57.0222	58.4	TP
6	Squat	25	15	3	3	0.818831	0.96	57.4974	58.7	TP
6	Squat	25	15	3	4	0.813836	0.94	60.1266	60.2	TP
6	Squat	25	15	3	5	0.801625	0.96	62.1208	62	TP
6	Squat	50	28	3	1	0.614361	0.71	52.9297	52.9	TP
6	Squat	50	28	3	2	0.676008	0.8	53.1945	52.8	TP
6	Squat	50	28	3	3	0.66928	0.78	53.7445	54.2	TP
6	Squat	50	28	3	4	0.641045	0.78	54.2177	54.6	TP
6	Squat	50	28	3	5	0.621343	0.72	55.8559	56.4	TP
6	Squat	70	38	3	1	0.564678	0.61	53.7972	51.2	TP
6	Squat	70	38	3	2	0.56025	0.61	51.54	50.6	TP
6	Squat	70	38	3	3	0.560015	0.61	53.9897	53.5	TP
6	Squat	70	38	3	4	0.576419	0.64	55.196	55.9	TP
6	Squat	70	38	3	5	0.547237	0.6	54.322	53.7	TP
6	Squat	90	50	3	1	0.417127	0.36	49.5066	55.1	TP
6	Squat	90	50	3	2	0.424572	0.51	49.502	53.4	TP
6	Squat	90	50	3	3	0.375691	0.46	50.5524	54.1	TP
6	Squat	100	55	3	1	0.424991	0.52	50.3052	51.5	TP
7	Squat	25	28	3	1	0.951371	0.99	58.8989	55.2	TP
7	Squat	25	28	3	2	0.996863	1.07	64.1016	62.4	TP
7	Squat	25	28	3	3	1.01384	1.08	64.1131	63.1	TP
7	Squat	25	28	3	4	1.00187	1.1	64.8392	64.8	TP
7	Squat	25	28	3	5	0.964578	1.04	65.0259	63.9	TP
7	Squat	50	55	3	1	0.763744	0.8	56.2726	55.1	TP
7	Squat	50	55	3	2	0.743838	0.83	52.0522	51.4	TP
7	Squat	50	55	3	3	0.761612	0.84	55.9103	56.8	TP
7	Squat	50	55	3	4	0.738533	0.84	56.0693	56.4	TP
7	Squat	50	55	3	5	0.585125	0.64	56.3983	55.2	TP
7	Squat	70	77	3	1	0.594078	0.67	52.3413	52	TP
7	Squat	70	77	3	2	0.602798	0.71	50.4463	50.2	TP
7	Squat	70	77	3	3	0.57382	0.65	49.4728	47.6	TP
7	Squat	70	77	3	4	0.572995	0.65	49.2448	49	TP
7	Squat	70	77	3	5	0.551512	0.63	49.8925	48.1	TP
7	Squat	90	98	3	1	0.461282	0.64	45.6633	46.4	TP
7	Squat	90	98	3	2	0.416162	0.55	44.7188	42.6	TP
7	Squat	90	98	3	3	0.412745	0.52	44.7226	44.7	TP
7	Squat	100	110	3	1	0.395197	0.5	43.6692	42.6	TP
8	Squat	25	20	3	1	0.84454	0.99	52.2296	53	TP
8	Squat	25	20	3	2	0.785306	0.92	51.6331	52.8	TP
8	Squat	25	20	3	3	0.890328	1.03	57.5233	57.5	TP
8	Squat	25	20	3	4	0.888069	0.98	55.6579	53.4	TP
8	Squat	25	20	3	5	0.957104	1.06	57.8985	57.9	TP
8	Squat	50	40	3	1	0.784013	0.96	52.8027	54.3	TP
8	Squat	50	40	3	2	0.761644	0.95	53.7841	57.8	TP
8	Squat	50	40	3	3	0.771314	0.96	57.8072	61.5	TP
8	Squat	50	40	3	4	0.794143	0.99	56.4051	60.2	TP
8	Squat	50	40	3	5	0.746397	0.93	54.7633	58.6	TP
8	Squat	70	55	3	1	0.664146	0.75	51.6186	50	TP
8	Squat	70	55	3	2	0.661799	0.78	54.2321	54.2	TP
8	Squat	70	55	3	3	0.668626	0.81	54.8014	56.2	TP
8	Squat	70	55	3	4	0.655137	0.75	54.302	57.4	TP
8	Squat	70	55	3	5	0.646853	0.82	54.0949	59.1	TP
8	Squat	90	72	3	1	0.513388	0.66	48.9043	50	TP
8	Squat	90	72	3	2	0.527849	0.68	51.2337	54.1	TP
8	Squat	90	72	3	3	0.481808	0.63	51.3222	55.2	TP
8	Squat	100	80	3	1	0.261092	0.3	46.196	45.6	TP
9	Squat	25	22	3	1	0.884229	0.99	52.0898	55	TP
9	Squat	25	22	3	2	0.697538	0.8	49.3984	50.3	TP
9	Squat	25	22	3	3	0.771066	0.89	49.5645	49.5	TP
9	Squat	25	22	3	4	0.788711	0.9	52.6709	52.4	TP
9	Squat	25	22	3	5	0.81068	0.85	53.4701	50.2	TP
9	Squat	50	42	3	1	0.594411	0.61	44.9249	47.3	TP
9	Squat	50	42	3	2	0.599646	0.63	46.0323	48.3	TP
9	Squat	50	42	3	3	0.601116	0.65	44.9854	47.8	TP
9	Squat	50	42	3	4	0.579878	0.72	44.936	47.2	TP
9	Squat	50	42	3	5	0.521933	0.59	46.7601	47.8	TP
9	Squat	70	60	3	1	0.528844	0.62	42.8732	41.6	TP
9	Squat	70	60	3	2	0.498796	0.62	45.8679	47.5	TP
9	Squat	70	60	3	3	0.499412	0.63	43.5897	40.4	TP
9	Squat	70	60	3	4	0.436982	0.55	43.7994	43.4	TP
9	Squat	70	60	3	5	0.443473	0.54	42.3526	42.1	TP
9	Squat	90	77	3	1	0.399268	0.54	38.5088	38.8	TP
9	Squat	90	77	3	2	0.377107	0.52	41.0492	40.6	TP
9	Squat	90	77	3	3	0.376873	0.49	38.8894	38.4	TP
9	Squat	100	85	3	1	0.405071	0.54	39.4963	37.9	TP
10	Squat	25	22	3	1	0.857554	0.96	47.4242	47.2	TP
10	Squat	25	22	3	2	0.871685	1.02	50.4478	51.9	TP
10	Squat	25	22	3	3	0.917504	1.04	51.0716	52	TP
10	Squat	25	22	3	4	0.839747	0.94	49.2189	49.9	TP
10	Squat	25	22	3	5	0.914235	1.01	52.8861	52.6	TP
10	Squat	50	43	3	1	0.778909	0.89	48.0595	48.9	TP
10	Squat	50	43	3	2	0.740994	0.85	47.8759	47.8	TP
10	Squat	50	43	3	3	0.747814	0.84	50.9287	51.7	TP
10	Squat	50	43	3	4	0.718877	0.82	52.914	53.6	TP
10	Squat	50	43	3	5	0.658389	0.74	52.1763	54.9	TP
10	Squat	70	60	3	3	0.545512	0.6	44.4381	44.8	TP
10	Squat	70	60	3	4	0.49593	0.56	47.085	47.8	TP
10	Squat	70	60	3	5	0.480409	0.54	49.7682	49.5	TP
10	Squat	70	60	3	6	0.49646	0.55	48.8752	48.7	TP
10	Squat	90	77	3	1	0.468643	0.53	41.2569	39.3	TP
10	Squat	90	77	3	2	0.418319	0.54	46.4384	45	TP
10	Squat	90	77	3	3	0.3145	0.42	42.4531	43.8	TP
10	Squat	100	85	3	1	0.360341	0.43	46.1945	47.3	TP
11	Squat	25	30	3	1	1.11446	1.3	68.03	66.9	TP
11	Squat	25	30	3	2	1.14228	1.36	69.2446	68.1	TP
11	Squat	25	30	3	3	1.14688	1.2	70.8842	70.5	TP
11	Squat	25	30	3	4	1.16363	1.26	72.9604	71	TP
11	Squat	25	30	3	5	1.1806	1.27	74.0864	72.7	TP
11	Squat	50	60	3	1	0.995284	1.05	71.5972	71.2	TP
11	Squat	50	60	3	2	1.00934	1.08	74.578	73.8	TP
11	Squat	50	60	3	3	1.01269	1.07	76.7169	76.2	TP
11	Squat	50	60	3	4	0.998795	1.04	77.6947	77.2	TP
11	Squat	50	60	3	5	0.999967	1.06	77.4639	77.6	TP
11	Squat	70	82	3	1	0.835799	0.88	75.6951	75.5	TP
11	Squat	70	82	3	2	0.769841	0.8	74.5027	74.3	TP
11	Squat	70	82	3	3	0.800906	0.85	73.9317	74.1	TP
11	Squat	70	82	3	4	0.74836	0.78	76.3785	75.1	TP
11	Squat	70	82	3	5	0.730285	0.8	77.6125	81.1	TP
11	Squat	90	105	3	1	0.606548	0.69	75.0486	73.1	TP
11	Squat	90	105	3	2	0.522677	0.61	77.5292	77.7	TP
11	Squat	90	105	3	3	0.456695	0.51	77.1646	75.9	TP
11	Squat	100	115	3	1	0.29144	0.35	75.6281	73	TP
12	Squat	25	25	3	1	0.736259	0.91	52.4851	56.5	TP
12	Squat	25	25	3	2	0.836704	1.03	60.115	62.1	TP
12	Squat	25	25	3	3	0.808288	0.93	59.0599	61.2	TP
12	Squat	25	25	3	4	0.797892	0.91	60.1054	61.5	TP
12	Squat	25	25	3	5	0.794173	0.96	63.0913	64.4	TP
12	Squat	50	50	3	1	0.689149	0.91	51.8347	55.1	TP
12	Squat	50	50	3	2	0.705055	0.78	55.3695	58.4	TP
12	Squat	50	50	3	3	0.655574	0.77	56.9511	58.6	TP
12	Squat	50	50	3	4	0.682672	0.84	57.756	59.6	TP
12	Squat	50	50	3	5	0.652676	0.75	59.0696	61.8	TP
12	Squat	70	75	3	1	0.555219	0.67	52.2876	51.8	TP
12	Squat	70	75	3	2	0.539009	0.64	52.6389	51.6	TP
12	Squat	70	75	3	3	0.529846	0.65	52.5287	53.6	TP
12	Squat	70	75	3	4	0.509116	0.61	55.7551	57.5	TP
12	Squat	70	75	3	5	0.48376	0.56	55.2323	54.2	TP
12	Squat	90	90	3	1	0.353512	0.5	53.9235	54.1	TP
12	Squat	90	90	3	2	0.371631	0.47	51.8409	49.6	TP
12	Squat	90	90	3	3	0.378881	0.47	50.3856	50.1	TP
12	Squat	100	100	3	1	0.315475	0.44	47.0214	49.1	TP
13	Squat	25	28	3	1	1.14149	1.26	63.331	62.1	TP
13	Squat	25	28	3	2	1.21221	1.36	70.7194	69.5	TP
13	Squat	25	28	3	3	1.24203	1.38	77.7185	74.6	TP
13	Squat	25	28	3	4	1.2601	1.33	81.1329	75.8	TP
13	Squat	25	28	3	5	1.29347	1.38	82.7932	79.4	TP
13	Squat	50	55	3	1	0.998044	1.1	76.3401	69.7	TP
13	Squat	50	55	3	2	1.03083	1.13	78.9452	76.1	TP
13	Squat	50	55	3	3	1.0083	1.15	79.9604	76.2	TP
13	Squat	50	55	3	4	0.941435	1.06	80.3514	76.9	TP
13	Squat	50	55	3	5	0.960074	1.08	81.8047	82.2	TP
13	Squat	70	77	3	1	0.844099	0.92	73.7256	73	TP
13	Squat	70	77	3	2	0.807994	0.87	74.7799	74.8	TP
13	Squat	70	77	3	3	0.740119	0.82	75.3234	71.9	TP
13	Squat	70	77	3	4	0.782504	0.76	77.8761	72.6	TP
13	Squat	70	77	3	5	0.740593	0.79	78.0742	75.3	TP
13	Squat	90	97	3	1	0.635073	0.69	63.9535	63.1	TP
13	Squat	90	97	3	2	0.619533	0.68	68.6062	66	TP
13	Squat	90	97	3	3	0.583609	0.65	70.1335	69.3	TP
13	Squat	100	110	3	1	0.505085	0.57	65.8509	65	TP
14	Squat	25	28	3	1	0.923977	1.06	49.0507	47.3	TP
14	Squat	25	28	3	2	0.936213	1.07	50.6839	50.9	TP
14	Squat	25	28	3	3	0.951876	1.1	55.3675	55.6	TP
14	Squat	25	28	3	4	0.910761	1.02	57.6776	58.7	TP
14	Squat	25	28	3	5	0.929223	1.04	59.0311	60.9	TP
14	Squat	50	55	3	1	0.784763	0.91	52.3927	52.4	TP
14	Squat	50	55	3	2	0.74311	0.89	56.3687	54.4	TP
14	Squat	50	55	3	3	0.798575	0.96	57.9873	58.3	TP
14	Squat	50	55	3	4	0.777344	0.9	57.4198	58.2	TP
14	Squat	50	55	3	5	0.698806	0.79	57.1128	58.9	TP
14	Squat	70	77	3	1	0.64174	0.74	51.6896	50.8	TP
14	Squat	70	77	3	2	0.650219	0.71	54.618	53.1	TP
14	Squat	70	77	3	3	0.609666	0.74	55.3878	56.1	TP
14	Squat	70	77	3	4	0.628415	0.77	57.4348	57.5	TP
14	Squat	70	77	3	5	0.541223	0.66	59.5454	59.4	TP
14	Squat	90	95	3	1	0.539521	0.62	52.4001	51.3	TP
14	Squat	90	95	3	2	0.47767	0.56	55.5962	54.8	TP
14	Squat	90	95	3	3	0.440586	0.52	55.3497	55.5	TP
14	Squat	100	110	3	1	0.371261	0.43	55.7758	56.7	TP
15	Squat	25	35	3	1	1.10692	1.22	56.7534	57.5	TP
15	Squat	25	35	3	2	1.19002	1.31	65.3087	65	TP
15	Squat	25	35	3	3	1.24118	1.3	70.7262	68.7	TP
15	Squat	25	35	3	4	1.21069	1.36	71.0666	72.6	TP
15	Squat	25	35	3	5	1.18086	1.3	73.9022	73.6	TP
15	Squat	50	70	3	1	0.933745	1.02	65.101	65.2	TP
15	Squat	50	70	3	2	0.898963	0.95	66.6999	65.6	TP
15	Squat	50	70	3	3	0.914055	0.96	69.4757	67.5	TP
15	Squat	50	70	3	4	0.90243	0.96	69.3749	67.3	TP
15	Squat	50	70	3	5	0.92733	0.99	68.6429	69	TP
15	Squat	70	98	3	1	0.757382	0.89	70.2806	68.1	TP
15	Squat	70	98	3	2	0.751772	0.87	70.3098	69.6	TP
15	Squat	70	98	3	3	0.652333	0.73	69.5188	67.6	TP
15	Squat	70	98	3	4	0.633109	0.7	71.6119	69.3	TP
15	Squat	70	98	3	5	0.635352	0.7	71.3425	70.4	TP
15	Squat	90	125	3	1	0.560495	0.64	72.8416	68	TP
15	Squat	90	125	3	2	0.509764	0.55	70.5687	66.2	TP
15	Squat	90	125	3	3	0.416758	0.46	72.4822	70	TP
15	Squat	100	140	3	1	0.415549	0.48	70.4632	69.1	TP
16	Squat	25	17	3	1	0.760233	0.92	42.8815	44.1	TP
16	Squat	25	17	3	2	0.829165	1.02	44.8282	47.8	TP
16	Squat	25	17	3	3	0.820597	1.01	45.9218	49.1	TP
16	Squat	25	17	3	4	0.822841	1.07	47.3814	48.9	TP
16	Squat	25	17	3	5	0.821518	0.99	47.26	48.5	TP
16	Squat	50	35	3	1	0.623593	0.69	41.664	40.3	TP
16	Squat	50	35	3	2	0.629098	0.74	43.2097	45.7	TP
16	Squat	50	35	3	3	0.636741	0.71	43.6905	44.8	TP
16	Squat	50	35	3	4	0.650259	0.77	43.3355	44.7	TP
16	Squat	50	35	3	5	0.614366	0.72	42.7356	46.2	TP
16	Squat	70	48	3	1	0.519057	0.57	40.6168	41.8	TP
16	Squat	70	48	3	2	0.518141	0.59	41.765	42.1	TP
16	Squat	70	48	3	3	0.506247	0.58	42.308	44.1	TP
16	Squat	70	48	3	4	0.502213	0.64	42.9277	45.8	TP
16	Squat	70	48	3	5	0.48827	0.55	42.5679	43.8	TP
16	Squat	90	60	3	1	0.392579	0.54	40.6479	39.2	TP
16	Squat	90	60	3	2	0.366914	0.46	41.0101	37.9	TP
16	Squat	90	60	3	3	0.347488	0.44	42.2073	42.1	TP
16	Squat	100	68	3	1	0.274921	0.32	40.8034	41.1	TP
17	Squat	25	50	3	1	1.20637	1.41	66.0511	68.6	TP
17	Squat	25	50	3	2	1.20619	1.43	66.2323	69.1	TP
17	Squat	25	50	3	3	1.17656	1.37	67.8761	70	TP
17	Squat	25	50	3	4	1.20998	1.35	69.5214	70.7	TP
17	Squat	25	50	3	5	1.21835	1.35	73.1357	73.1	TP
17	Squat	50	100	3	1	0.968956	1.04	66.3748	65.2	TP
17	Squat	50	100	3	2	0.969652	1.04	69.1878	69	TP
17	Squat	50	100	3	3	0.978765	1.06	67.091	65.1	TP
17	Squat	50	100	3	4	0.960368	0.97	69.985	64.9	TP
17	Squat	50	100	3	5	0.968	1.01	75.1699	70.5	TP
17	Squat	70	140	3	1	0.767595	0.8	66.0389	60.8	TP
17	Squat	70	140	3	2	0.701394	0.71	64.9384	59.1	TP
17	Squat	70	140	3	3	0.691041	0.73	64.4186	59.1	TP
17	Squat	70	140	3	4	0.662169	0.71	64.7155	61.1	TP
17	Squat	70	140	3	5	0.684911	0.74	69.0703	65	TP
17	Squat	90	180	3	1	0.520382	0.6	62.7666	59.1	TP
17	Squat	90	180	3	2	0.452436	0.53	65.1111	61.4	TP
17	Squat	90	180	3	3	0.420411	0.47	67.8864	62.9	TP
17	Squat	100	200	3	1	0.287309	0.38	66.0142	65.1	TP
18	Squat	25	15	3	1	0.877585	1.04	45.9779	47	TP
18	Squat	25	15	3	2	0.847433	1.05	45.1821	48.7	TP
18	Squat	25	15	3	3	0.806943	0.97	44.0684	44.8	TP
18	Squat	25	15	3	4	0.850554	1	47.3466	48.4	TP
18	Squat	25	15	3	5	0.833127	1.02	47.74	50	TP
18	Squat	50	18	3	1	0.800208	0.91	49.6506	51.1	TP
18	Squat	50	18	3	2	0.820716	1	51.6099	52.7	TP
18	Squat	50	18	3	3	0.751603	0.85	47.8989	46.9	TP
18	Squat	50	18	3	4	0.693258	0.77	46.7179	46.7	TP
18	Squat	50	18	3	5	0.757078	0.97	48.1721	47.2	TP
18	Squat	70	30	3	1	0.713392	0.8	47.6645	48.2	TP
18	Squat	70	30	3	2	0.6723	0.78	46.8636	47	TP
18	Squat	70	30	3	3	0.64319	0.76	45.6681	46.4	TP
18	Squat	70	30	3	4	0.625607	0.72	46.9626	46	TP
18	Squat	70	30	3	5	0.6385	0.75	47.1387	48.2	TP
18	Squat	90	40	3	1	0.53845	0.69	43.3016	45.9	TP
18	Squat	90	40	3	2	0.47591	0.6	38.5415	40	TP
18	Squat	90	40	3	3	0.438517	0.56	39.0665	39.7	TP
18	Squat	100	45	3	1	0.32994	0.42	37.6959	39.2	TP
19	Squat	25	15	3	1	0.906608	1.04	49.5827	52.5	TP
19	Squat	25	15	3	2	0.898481	1.05	48.393	48.1	TP
19	Squat	25	15	3	3	0.98892	1.22	52.1307	55.3	TP
19	Squat	25	15	3	4	1.0146	1.17	53.0804	55.3	TP
19	Squat	25	15	3	5	0.975382	1.14	52.9382	52.8	TP
19	Squat	50	18	3	1	0.627633	0.88	50.7203	56.1	TP
19	Squat	50	18	3	2	0.69496	0.81	52.1172	51	TP
19	Squat	50	18	3	3	0.891693	1.06	56.3422	55.6	TP
19	Squat	50	18	3	4	0.885865	0.98	56.9144	55.3	TP
19	Squat	50	18	3	5	0.785888	0.82	55.7013	53.8	TP
19	Squat	70	30	3	1	0.398121	0.59	48.47	50.8	TP
19	Squat	70	30	3	2	0.510189	0.76	50.2598	49.3	TP
19	Squat	70	30	3	3	0.592559	0.72	50.3398	49.5	TP
19	Squat	70	30	3	4	0.675675	0.87	50.5551	50.2	TP
19	Squat	70	30	3	5	0.516461	0.77	51.3837	53.5	TP
19	Squat	90	40	3	1	0.265968	0.39	52.2816	53.8	TP
19	Squat	90	40	3	2	0.285927	0.41	52.9391	54.3	TP
19	Squat	90	40	3	3	0.263372	0.41	51.1638	52	TP
19	Squat	100	45	3	1	0.269597	0.31	54.9222	56.1	TP
20	Squat	25	28	3	1	1.05086	1.2	57.5877	59	TP
20	Squat	25	28	3	2	1.02602	1.2	54.2669	56.8	TP
20	Squat	25	28	3	3	0.951268	1.21	61.0802	65.7	TP
20	Squat	25	28	3	4	1.0033	1.16	59.3045	60.6	TP
20	Squat	25	28	3	5	1.0386	1.24	60.0248	63	TP
20	Squat	50	55	3	1	0.900225	1.06	55.0272	57.4	TP
20	Squat	50	55	3	2	0.911041	1.07	61.0017	64.1	TP
20	Squat	50	55	3	3	0.894879	1.02	56.2101	59.5	TP
20	Squat	50	55	3	4	0.830631	1.05	55.8956	61.6	TP
20	Squat	50	55	3	5	0.887803	1.05	61.5308	64	TP
20	Squat	70	77	3	1	0.729421	0.85	51.6312	55.1	TP
20	Squat	70	77	3	2	0.690149	0.88	55.7539	56.4	TP
20	Squat	70	77	3	3	0.644575	0.75	54.3625	55.4	TP
20	Squat	70	77	3	4	0.653868	0.84	56.5966	58.1	TP
20	Squat	70	77	3	5	0.584479	0.69	52.5235	53.1	TP
20	Squat	90	100	3	1	0.292016	0.34	47.4033	44.4	TP
20	Squat	90	100	3	2	0.259996	0.31	45.4295	46.1	TP
20	Squat	90	100	3	3	0.261458	0.3	45.5459	45.5	TP
20	Squat	100	110	3	1	0.25098	0.34	46.7964	47.2	TP
21	Squat	25	28	3	1	0.994523	1.04	57.9457	57.6	TP
21	Squat	25	28	3	2	0.917987	0.98	57.1614	57	TP
21	Squat	25	28	3	3	0.948929	0.97	59.0348	57.2	TP
21	Squat	25	28	3	4	0.922521	0.92	57.6276	55.7	TP
21	Squat	25	28	3	5	0.915422	0.9	57.8181	57.5	TP
21	Squat	50	55	3	1	0.826266	0.88	57.7512	57.8	TP
21	Squat	50	55	3	2	0.826509	0.85	57.9918	58.8	TP
21	Squat	50	55	3	3	0.778762	0.82	54.6977	53.5	TP
21	Squat	50	55	3	4	0.752049	0.8	54.485	54.1	TP
21	Squat	50	55	3	5	0.737363	0.77	54.8331	51.9	TP
21	Squat	70	77	3	1	0.702644	0.76	57.205	58.5	TP
21	Squat	70	77	3	2	0.653005	0.68	56.6562	55.5	TP
21	Squat	70	77	3	3	0.624289	0.67	51.6709	51	TP
21	Squat	70	77	3	4	0.595983	0.67	53.5477	53.1	TP
21	Squat	70	77	3	5	0.579173	0.61	55.8234	55.6	TP
21	Squat	90	95	3	1	0.563794	0.62	56.8997	56.8	TP
21	Squat	90	95	3	2	0.497838	0.54	56.9075	55.7	TP
21	Squat	90	95	3	3	0.482403	0.51	55.9919	54.2	TP
21	Squat	100	110	3	1	0.470857	0.5	51.3131	51.1	TP
22	Squat	25	28	3	1	1.00202	1.08	55.1174	54.5	TP
22	Squat	25	28	3	2	1.0178	1.01	58.0848	56.2	TP
22	Squat	25	28	3	3	0.877217	0.89	59.3219	58.1	TP
22	Squat	25	28	3	4	1.05113	1.09	57.684	55.1	TP
22	Squat	25	28	3	5	0.935302	0.99	57.7953	58.2	TP
22	Squat	50	55	3	1	0.871727	0.91	51.5566	50.3	TP
22	Squat	50	55	3	2	0.852572	0.87	54.9998	54	TP
22	Squat	50	55	3	3	0.795611	0.83	55.8747	51.9	TP
22	Squat	50	55	3	4	0.796317	0.81	57.2456	54.7	TP
22	Squat	50	55	3	5	0.793896	0.82	56.36	53.7	TP
22	Squat	70	77	3	1	0.719192	0.79	48.1477	46.5	TP
22	Squat	70	77	3	2	0.706835	0.71	50.1612	46.4	TP
22	Squat	70	77	3	3	0.666657	0.71	51.3607	49.8	TP
22	Squat	70	77	3	4	0.641891	0.66	51.6524	48.8	TP
22	Squat	70	77	3	5	0.679251	0.68	53.8041	50.2	TP
22	Squat	90	95	3	1	0.595484	0.61	47.0252	44.4	TP
22	Squat	90	95	3	2	0.50763	0.52	50.6617	47.5	TP
22	Squat	90	95	3	3	0.545106	0.57	52.4826	50.1	TP
22	Squat	100	110	3	1	0.537739	0.56	51.2062	46.1	TP
23	Squat	25	28	3	1	1.00523	1.06	60.8528	60.7	TP
23	Squat	25	28	3	2	1.02945	1.14	61.3223	61.4	TP
23	Squat	25	28	3	3	1.04296	1.13	60.4193	59.2	TP
23	Squat	25	28	3	4	1.11319	1.21	61.6009	61.4	TP
23	Squat	25	28	3	5	1.08265	1.14	62.8817	63.2	TP
23	Squat	50	58	3	1	0.850581	0.85	57.4805	55.6	TP
23	Squat	50	58	3	2	0.831623	0.86	57.5762	56.3	TP
23	Squat	50	58	3	3	0.84542	0.87	58.4773	58.4	TP
23	Squat	50	58	3	4	0.827231	0.84	58.4117	56.4	TP
23	Squat	50	58	3	5	0.83856	0.88	60.9877	59	TP
23	Squat	70	80	3	1	0.729655	0.72	58.7471	55.7	TP
23	Squat	70	80	3	2	0.677163	0.7	57.7167	56.1	TP
23	Squat	70	80	3	3	0.641539	0.63	53.7547	51.8	TP
23	Squat	70	80	3	4	0.665046	0.68	57.7315	54.4	TP
23	Squat	70	80	3	5	0.650419	0.65	59.2642	56.1	TP
23	Squat	90	103	3	1	0.504561	0.52	59.115	56.3	TP
23	Squat	90	103	3	2	0.47338	0.5	58.8595	58.2	TP
23	Squat	90	103	3	3	0.4702	0.49	59.9141	58	TP
23	Squat	100	115	3	1	0.358149	0.36	60.1465	57.4	TP
24	Squat	25	25	3	1	0.966368	1.05	58.5686	56.8	TP
24	Squat	25	25	3	2	1.001	1.11	59.2139	59.5	TP
24	Squat	25	25	3	3	0.996268	1.1	62.7967	62.9	TP
24	Squat	25	25	3	4	0.972933	1.07	61.8549	62.5	TP
24	Squat	25	25	3	5	0.997519	1.03	62.593	62	TP
24	Squat	50	45	3	1	0.75492	0.86	55.8976	56.4	TP
24	Squat	50	45	3	2	0.840343	0.92	57.6939	58.7	TP
24	Squat	50	45	3	3	0.835647	0.91	60.8661	60.7	TP
24	Squat	50	45	3	4	0.810795	0.84	57.7606	55.2	TP
24	Squat	50	45	3	5	0.748998	0.8	63.0512	62	TP
24	Squat	70	63	3	1	0.664577	0.71	58.8845	59.3	TP
24	Squat	70	63	3	2	0.647249	0.69	59.104	59.3	TP
24	Squat	70	63	3	3	0.611743	0.64	60.8267	61.3	TP
24	Squat	70	63	3	4	0.643637	0.64	60.7539	58.2	TP
24	Squat	70	63	3	5	0.630449	0.62	60.7087	56.5	TP
24	Squat	90	80	3	1	0.540144	0.57	45.27	44.5	TP
24	Squat	90	80	3	2	0.527205	0.6	49.9788	48.7	TP
24	Squat	90	80	3	3	0.555103	0.57	49.3198	47.7	TP
24	Squat	100	90	3	1	0.384797	0.4	55.5087	54	TP
1	Squat	25	15	4	1	0.882561	1.11	55.5344	58.8	TP
1	Squat	25	15	4	2	0.804045	0.94	57.5789	59.8	TP
1	Squat	25	15	4	3	0.737831	1.04	60.3321	60.5	TP
1	Squat	25	15	4	4	0.787147	1.02	59.1487	61.1	TP
1	Squat	25	15	4	5	0.710708	0.93	60.2796	61.1	TP
1	Squat	50	30	4	1	0.763842	0.88	55.4876	55.6	TP
1	Squat	50	30	4	2	0.639708	0.79	55.6217	56.6	TP
1	Squat	50	30	4	3	0.622586	0.73	52.5204	51.8	TP
1	Squat	50	30	4	4	0.681151	0.8	56.9383	57.9	TP
1	Squat	50	30	4	5	0.629146	0.77	55.8897	56.4	TP
1	Squat	70	42	4	1	0.650933	0.79	53.6285	55.6	TP
1	Squat	70	42	4	2	0.612957	0.71	53.75	55.9	TP
1	Squat	70	42	4	3	0.624136	0.79	55.24	56	TP
1	Squat	70	42	4	4	0.57632	0.72	53.5034	59	TP
1	Squat	70	42	4	5	0.542568	0.63	54.5286	58.6	TP
1	Squat	90	53	4	1	0.551932	0.63	55.4635	60.3	TP
1	Squat	90	53	4	2	0.454525	0.58	51.4619	58.1	TP
1	Squat	90	53	4	3	0.449482	0.58	52.7494	61.1	TP
1	Squat	100	60	4	1	0.298055	0.48	50.6309	55.1	TP
2	Squat	25	18	4	1	1.05044	1.18	52.5337	52.2	TP
2	Squat	25	18	4	2	1.02271	1.19	50.0292	50.3	TP
2	Squat	25	18	4	3	1.18536	1.35	51.23	52	TP
2	Squat	25	18	4	4	1.18853	1.34	50.8833	51.4	TP
2	Squat	25	18	4	5	1.17116	1.32	51.5559	52.2	TP
2	Squat	50	38	4	1	0.858461	0.96	57.7768	57.2	TP
2	Squat	50	38	4	2	0.881238	0.99	56.6186	55.3	TP
2	Squat	50	38	4	3	0.89857	1	56.8498	56.3	TP
2	Squat	50	38	4	4	0.914079	1.08	55.4056	55.9	TP
2	Squat	50	38	4	5	0.932193	1.07	54.1829	54.6	TP
2	Squat	70	52	4	1	0.793862	0.85	55.4226	56.4	TP
2	Squat	70	52	4	2	0.80158	0.9	56.3507	58.4	TP
2	Squat	70	52	4	3	0.789125	0.9	56.4802	58.6	TP
2	Squat	70	52	4	4	0.793098	0.92	57.3565	60.9	TP
2	Squat	70	52	4	5	0.805217	0.93	56.0846	59.8	TP
2	Squat	90	68	4	1	0.675591	0.84	56.3461	54.1	TP
2	Squat	90	68	4	2	0.734409	0.87	52.9507	51.6	TP
2	Squat	90	68	4	3	0.652765	0.85	57.4188	59.1	TP
2	Squat	100	75	4	1	0.251669	0.31	52.6429	51.4	TP
3	Squat	25	15	4	1	0.496385	0.68	46.1226	46.9	TP
3	Squat	25	15	4	2	0.703039	0.93	49.9288	47.6	TP
3	Squat	25	15	4	3	0.756813	0.99	49.7773	49.7	TP
3	Squat	25	15	4	4	0.698454	0.9	53.1196	52.1	TP
3	Squat	25	15	4	5	0.739875	1	55.2657	54.3	TP
3	Squat	50	32	4	1	0.655368	0.81	43.4857	40.4	TP
3	Squat	50	32	4	2	0.6717	0.82	42.2246	40.8	TP
3	Squat	50	32	4	3	0.590034	0.72	40.6378	40.8	TP
3	Squat	50	32	4	4	0.59062	0.72	41.7037	40.7	TP
3	Squat	50	32	4	5	0.620224	0.74	41.1811	39.6	TP
3	Squat	70	45	4	1	0.520804	0.77	37.1555	36.5	TP
3	Squat	70	45	4	2	0.438437	0.67	38.6956	38.2	TP
3	Squat	70	45	4	3	0.494045	0.81	37.2319	37	TP
3	Squat	70	45	4	4	0.464316	0.79	37.7339	37.6	TP
3	Squat	70	45	4	5	0.446139	0.82	38.0338	40.1	TP
3	Squat	90	57	4	1	0.526142	0.9	35.6024	34.7	TP
3	Squat	90	57	4	2	0.448822	0.74	37.396	36.2	TP
3	Squat	90	57	4	3	0.424628	0.61	39.8014	38.6	TP
3	Squat	100	63	4	1	0.384044	0.5	34.3961	35	TP
4	Squat	25	22	4	1	0.695895	0.87	53.426	54.4	TP
4	Squat	25	22	4	2	0.759269	0.94	56.8088	57.4	TP
4	Squat	25	22	4	3	0.818088	1.02	56.6138	57	TP
4	Squat	25	22	4	4	0.793857	0.95	56.9793	56	TP
4	Squat	25	22	4	5	0.653443	0.92	55.8029	56.8	TP
4	Squat	50	42	4	1	0.74	0.89	49.82	55.1	TP
4	Squat	50	42	4	2	0.74	0.91	52.18	56.6	TP
4	Squat	50	42	4	3	0.73	0.86	52.54	56.7	TP
4	Squat	50	42	4	4	0.73	0.88	52.39	56.3	TP
4	Squat	50	42	4	5	0.73	0.85	52.38	55.1	TP
4	Squat	70	60	4	1	0.629008	0.7	46.7742	47.6	TP
4	Squat	70	60	4	2	0.5858	0.67	50.6181	50.9	TP
4	Squat	70	60	4	3	0.589648	0.65	52.3576	51.8	TP
4	Squat	70	60	4	4	0.596855	0.64	50.9497	51.4	TP
4	Squat	70	60	4	5	0.580732	0.66	51.7619	51.3	TP
4	Squat	90	77	4	1	0.495015	0.68	43.9209	46.7	TP
4	Squat	90	77	4	2	0.456521	0.59	48.1182	47.8	TP
4	Squat	90	77	4	3	0.398466	0.48	50.6018	52.2	TP
4	Squat	100	85	4	1	0.323134	0.39	49.2848	51.3	TP
5	Squat	25	40	4	1	1.11147	1.29	63.3572	66.1	TP
5	Squat	25	40	4	2	1.10056	1.28	63.3887	66.7	TP
5	Squat	25	40	4	3	1.11016	1.25	63.5264	65.6	TP
5	Squat	25	40	4	4	1.07331	1.21	64.1147	65.9	TP
5	Squat	25	40	4	5	1.18268	1.31	67.1489	68	TP
5	Squat	50	78	4	1	0.90818	1.17	64.8005	65.9	TP
5	Squat	50	78	4	2	0.876887	1.1	65.3685	65.7	TP
5	Squat	50	78	4	3	0.909705	1.16	64.409	65.4	TP
5	Squat	50	78	4	4	0.90737	1.1	64.5549	64.4	TP
5	Squat	50	78	4	5	0.862934	1.06	66.6815	66	TP
5	Squat	70	108	4	1	0.782012	1	63.9204	63.9	TP
5	Squat	70	108	4	2	0.749922	0.92	67.5321	65.1	TP
5	Squat	70	108	4	3	0.769455	0.95	65.8444	64.5	TP
5	Squat	70	108	4	4	0.748357	0.94	64.231	63.7	TP
5	Squat	70	108	4	5	0.770126	0.99	65.325	64.6	TP
5	Squat	90	140	4	1	0.592519	0.66	67.4243	65.5	TP
5	Squat	90	140	4	2	0.545659	0.59	69.7402	66.5	TP
5	Squat	90	140	4	3	0.485091	0.55	66.9818	66.3	TP
5	Squat	100	155	4	1	0.511752	0.6	67.8341	65.9	TP
6	Squat	25	15	4	1	0.788835	0.94	54.3626	55	TP
6	Squat	25	15	4	2	0.822044	1.01	57.0222	59.6	TP
6	Squat	25	15	4	3	0.818831	0.99	57.4974	58.9	TP
6	Squat	25	15	4	4	0.813836	1	60.1266	61	TP
6	Squat	25	15	4	5	0.801625	0.95	62.1208	62.8	TP
6	Squat	50	28	4	1	0.614361	0.79	52.9297	52.7	TP
6	Squat	50	28	4	2	0.676008	0.84	53.1945	53.5	TP
6	Squat	50	28	4	3	0.66928	0.78	53.7445	54.2	TP
6	Squat	50	28	4	4	0.641045	0.78	54.2177	55.4	TP
6	Squat	50	28	4	5	0.621343	0.79	55.8559	56.4	TP
6	Squat	70	38	4	1	0.564678	0.64	53.7972	51.3	TP
6	Squat	70	38	4	2	0.56025	0.63	51.54	50.8	TP
6	Squat	70	38	4	3	0.560015	0.65	53.9897	53.8	TP
6	Squat	70	38	4	4	0.576419	0.67	55.196	56	TP
6	Squat	70	38	4	5	0.547237	0.63	54.322	52.7	TP
6	Squat	90	50	4	1	0.417127	0.52	49.5066	55	TP
6	Squat	90	50	4	2	0.424572	0.51	49.502	54.9	TP
6	Squat	90	50	4	3	0.375691	0.45	50.5524	55.4	TP
6	Squat	100	55	4	1	0.424991	0.55	50.3052	50.9	TP
7	Squat	25	28	4	1	0.951371	1.01	58.8989	56.1	TP
7	Squat	25	28	4	2	0.996863	1.13	64.1016	61.3	TP
7	Squat	25	28	4	3	1.01384	1.13	64.1131	63.1	TP
7	Squat	25	28	4	4	1.00187	1.14	64.8392	63.6	TP
7	Squat	25	28	4	5	0.964578	0.98	65.0259	61.6	TP
7	Squat	50	55	4	1	0.763744	0.83	56.2726	55.5	TP
7	Squat	50	55	4	2	0.743838	0.87	52.0522	51.7	TP
7	Squat	50	55	4	3	0.761612	0.84	55.9103	58.2	TP
7	Squat	50	55	4	4	0.738533	0.86	56.0693	55.7	TP
7	Squat	50	55	4	5	0.585125	0.63	56.3983	54.4	TP
7	Squat	70	77	4	1	0.594078	0.67	52.3413	50.5	TP
7	Squat	70	77	4	2	0.602798	0.58	50.4463	49.3	TP
7	Squat	70	77	4	3	0.57382	0.72	49.4728	48.3	TP
7	Squat	70	77	4	4	0.572995	0.61	49.2448	49	TP
7	Squat	70	77	4	5	0.551512	0.56	49.8925	49.1	TP
7	Squat	90	98	4	1	0.461282	0.67	45.6633	46.6	TP
7	Squat	90	98	4	2	0.416162	0.53	44.7188	43.4	TP
7	Squat	90	98	4	3	0.412745	0.56	44.7226	45.1	TP
7	Squat	100	110	4	1	0.395197	0.48	43.6692	43.6	TP
8	Squat	25	20	4	1	0.84454	1.1	52.2296	53.4	TP
8	Squat	25	20	4	2	0.785306	0.9	51.6331	53.2	TP
8	Squat	25	20	4	3	0.890328	1	57.5233	58.1	TP
8	Squat	25	20	4	4	0.888069	1.07	55.6579	52.1	TP
8	Squat	25	20	4	5	0.957104	1.12	57.8985	57.8	TP
8	Squat	50	40	4	1	0.784013	1.03	52.8027	55.6	TP
8	Squat	50	40	4	2	0.761644	0.89	53.7841	58.4	TP
8	Squat	50	40	4	3	0.771314	1	57.8072	62.8	TP
8	Squat	50	40	4	4	0.794143	1.04	56.4051	61.2	TP
8	Squat	50	40	4	5	0.746397	1.04	54.7633	58.9	TP
8	Squat	70	55	4	1	0.664146	0.88	51.6186	49.6	TP
8	Squat	70	55	4	2	0.661799	0.86	54.2321	53.7	TP
8	Squat	70	55	4	3	0.668626	0.82	54.8014	56.1	TP
8	Squat	70	55	4	4	0.655137	0.82	54.302	57.6	TP
8	Squat	70	55	4	5	0.646853	0.87	54.0949	59.4	TP
8	Squat	90	72	4	1	0.513388	0.65	48.9043	50.8	TP
8	Squat	90	72	4	2	0.527849	0.66	51.2337	54.4	TP
8	Squat	90	72	4	3	0.481808	0.59	51.3222	55.2	TP
8	Squat	100	80	4	1	0.261092	0.32	46.196	45.8	TP
9	Squat	25	22	4	1	0.884229	1.06	52.0898	55	TP
9	Squat	25	22	4	2	0.697538	0.84	49.3984	49.6	TP
9	Squat	25	22	4	3	0.771066	0.78	49.5645	48.9	TP
9	Squat	25	22	4	4	0.788711	0.86	52.6709	52.2	TP
9	Squat	25	22	4	5	0.81068	0.92	53.4701	50.4	TP
9	Squat	50	42	4	1	0.594411	0.67	44.9249	46	TP
9	Squat	50	42	4	2	0.599646	0.69	46.0323	47.7	TP
9	Squat	50	42	4	3	0.601116	0.74	44.9854	47.2	TP
9	Squat	50	42	4	4	0.579878	0.73	44.936	45.5	TP
9	Squat	50	42	4	5	0.521933	0.56	46.7601	47.1	TP
9	Squat	70	60	4	1	0.528844	0.62	42.8732	40.9	TP
9	Squat	70	60	4	2	0.498796	0.6	45.8679	46.8	TP
9	Squat	70	60	4	3	0.499412	0.48	43.5897	40.5	TP
9	Squat	70	60	4	4	0.436982	0.55	43.7994	43.7	TP
9	Squat	70	60	4	5	0.443473	0.52	42.3526	42.2	TP
9	Squat	90	77	4	1	0.399268	0.53	38.5088	38.8	TP
9	Squat	90	77	4	2	0.377107	0.46	41.0492	39.9	TP
9	Squat	90	77	4	3	0.376873	0.44	38.8894	36.1	TP
9	Squat	100	85	4	1	0.405071	0.5	39.4963	37.8	TP
10	Squat	25	22	4	1	0.857554	0.99	47.4242	46.5	TP
10	Squat	25	22	4	2	0.871685	1	50.4478	51.2	TP
10	Squat	25	22	4	3	0.917504	1.2	51.0716	51.3	TP
10	Squat	25	22	4	4	0.839747	0.9	49.2189	48.4	TP
10	Squat	25	22	4	5	0.914235	0.98	52.8861	52.4	TP
10	Squat	50	43	4	1	0.778909	0.84	48.0595	49.3	TP
10	Squat	50	43	4	2	0.740994	0.82	47.8759	48.9	TP
10	Squat	50	43	4	3	0.747814	0.82	50.9287	51.8	TP
10	Squat	50	43	4	4	0.718877	0.83	52.914	53.2	TP
10	Squat	50	43	4	5	0.658389	0.73	52.1763	53.8	TP
10	Squat	70	60	4	3	0.545512	0.63	44.4381	44.3	TP
10	Squat	70	60	4	4	0.49593	0.57	47.085	47.5	TP
10	Squat	70	60	4	5	0.480409	0.53	49.7682	49.8	TP
10	Squat	70	60	4	6	0.49646	0.55	48.8752	48.8	TP
10	Squat	90	77	4	1	0.468643	0.64	41.2569	39	TP
10	Squat	90	77	4	2	0.418319	0.51	46.4384	44.1	TP
10	Squat	90	77	4	3	0.3145	0.41	42.4531	44.2	TP
10	Squat	100	85	4	1	0.360341	0.47	46.1945	44.9	TP
11	Squat	25	30	4	1	1.11446	1.18	68.03	66.9	TP
11	Squat	25	30	4	2	1.14228	1.29	69.2446	67	TP
11	Squat	25	30	4	3	1.14688	0.97	70.8842	46	TP
11	Squat	25	30	4	4	1.16363	1.37	72.9604	68.9	TP
11	Squat	25	30	4	5	1.1806	1.34	74.0864	71.7	TP
11	Squat	50	60	4	1	0.995284	1.1	71.5972	71.7	TP
11	Squat	50	60	4	2	1.00934	1.1	74.578	74.3	TP
11	Squat	50	60	4	3	1.01269	1.12	76.7169	76.1	TP
11	Squat	50	60	4	4	0.998795	0.99	77.6947	75.5	TP
11	Squat	50	60	4	5	0.999967	1.03	77.4639	76.3	TP
11	Squat	70	82	4	1	0.835799	0.9	75.6951	73.5	TP
11	Squat	70	82	4	2	0.769841	0.83	74.5027	73.4	TP
11	Squat	70	82	4	3	0.800906	0.78	73.9317	73.4	TP
11	Squat	70	82	4	4	0.74836	0.75	76.3785	73.5	TP
11	Squat	70	82	4	5	0.730285	0.68	77.6125	75.9	TP
11	Squat	90	105	4	1	0.606548	0.71	75.0486	72.1	TP
11	Squat	90	105	4	2	0.522677	0.63	77.5292	77.4	TP
11	Squat	90	105	4	3	0.456695	0.54	77.1646	74.5	TP
11	Squat	100	115	4	1	0.29144	0.37	75.6281	72.9	TP
12	Squat	25	25	4	1	0.736259	0.92	52.4851	56.5	TP
12	Squat	25	25	4	2	0.836704	1.07	60.115	61.5	TP
12	Squat	25	25	4	3	0.808288	1	59.0599	59.4	TP
12	Squat	25	25	4	4	0.797892	0.96	60.1054	61.4	TP
12	Squat	25	25	4	5	0.794173	1	63.0913	63.6	TP
12	Squat	50	50	4	1	0.689149	0.91	51.8347	56.6	TP
12	Squat	50	50	4	2	0.705055	0.87	55.3695	58.6	TP
12	Squat	50	50	4	3	0.655574	0.77	56.9511	58.4	TP
12	Squat	50	50	4	4	0.682672	0.82	57.756	60.5	TP
12	Squat	50	50	4	5	0.652676	0.79	59.0696	61.6	TP
12	Squat	70	75	4	1	0.555219	0.68	52.2876	52.6	TP
12	Squat	70	75	4	2	0.539009	0.66	52.6389	51.9	TP
12	Squat	70	75	4	3	0.529846	0.67	52.5287	52.3	TP
12	Squat	70	75	4	4	0.509116	0.63	55.7551	57	TP
12	Squat	70	75	4	5	0.48376	0.59	55.2323	54	TP
12	Squat	90	90	4	1	0.353512	0.47	53.9235	53.1	TP
12	Squat	90	90	4	2	0.371631	0.48	51.8409	49.7	TP
12	Squat	90	90	4	3	0.378881	0.48	50.3856	49.6	TP
12	Squat	100	100	4	1	0.315475	0.44	47.0214	48.8	TP
13	Squat	25	28	4	1	1.14149	1.26	63.331	63	TP
13	Squat	25	28	4	2	1.21221	1.42	70.7194	68.4	TP
13	Squat	25	28	4	3	1.24203		77.7185		FN
13	Squat	25	28	4	4	1.2601	1.35	81.1329	78.3	TP
13	Squat	25	28	4	5	1.29347		82.7932		FN
13	Squat	50	55	4	1	0.998044	1.18	76.3401	70.6	TP
13	Squat	50	55	4	2	1.03083	0.72	78.9452	72	TP
13	Squat	50	55	4	3	1.0083	1.12	79.9604	77.7	TP
13	Squat	50	55	4	4	0.941435	1.18	80.3514	77.7	TP
13	Squat	50	55	4	5	0.960074	1.2	81.8047	79.6	TP
13	Squat	70	77	4	1	0.844099	0.9	73.7256	73.3	TP
13	Squat	70	77	4	2	0.807994	0.9	74.7799	74.4	TP
13	Squat	70	77	4	3	0.740119	0.81	75.3234	73	TP
13	Squat	70	77	4	4	0.782504	0.8	77.8761	71.5	TP
13	Squat	70	77	4	5	0.740593	0.79	78.0742	77.4	TP
13	Squat	90	97	4	1	0.635073	0.7	63.9535	63.6	TP
13	Squat	90	97	4	2	0.619533	0.66	68.6062	63.6	TP
13	Squat	90	97	4	3	0.583609	0.58	70.1335	69	TP
13	Squat	100	110	4	1	0.505085	0.51	65.8509	65.6	TP
14	Squat	25	28	4	1	0.923977	1.03	49.0507	47.7	TP
14	Squat	25	28	4	2	0.936213	1.13	50.6839	50.3	TP
14	Squat	25	28	4	3	0.951876	1.11	55.3675	54.4	TP
14	Squat	25	28	4	4	0.910761	1.03	57.6776	57.9	TP
14	Squat	25	28	4	5	0.929223	0.95	59.0311	61.1	TP
14	Squat	50	55	4	1	0.784763	0.98	52.3927	50.1	TP
14	Squat	50	55	4	2	0.74311	0.92	56.3687	54.2	TP
14	Squat	50	55	4	3	0.798575	0.95	57.9873	58.1	TP
14	Squat	50	55	4	4	0.777344	0.79	57.4198	57.3	TP
14	Squat	50	55	4	5	0.698806	0.8	57.1128	58	TP
14	Squat	70	77	4	1	0.64174	0.78	51.6896	50.7	TP
14	Squat	70	77	4	2	0.650219	0.56	54.618	51.3	TP
14	Squat	70	77	4	3	0.609666	0.63	55.3878	56.4	TP
14	Squat	70	77	4	4	0.628415	0.8	57.4348	57.3	TP
14	Squat	70	77	4	5	0.541223	0.61	59.5454	59.1	TP
14	Squat	90	95	4	1	0.539521	0.52	52.4001	50.8	TP
14	Squat	90	95	4	2	0.47767	0.56	55.5962	55	TP
14	Squat	90	95	4	3	0.440586	0.56	55.3497	56.3	TP
14	Squat	100	110	4	1	0.371261	0.4	55.7758	55.9	TP
15	Squat	25	35	4	1	1.10692	1.22	56.7534	56.9	TP
15	Squat	25	35	4	2	1.19002	1.3	65.3087	64.9	TP
15	Squat	25	35	4	3	1.24118	1.38	70.7262	69.9	TP
15	Squat	25	35	4	4	1.21069	1.34	71.0666	70.4	TP
15	Squat	25	35	4	5	1.18086	1.28	73.9022	72.8	TP
15	Squat	50	70	4	1	0.933745	0.97	65.101	66.3	TP
15	Squat	50	70	4	2	0.898963	0.99	66.6999	67.8	TP
15	Squat	50	70	4	3	0.914055	1.03	69.4757	70.4	TP
15	Squat	50	70	4	4	0.90243	0.99	69.3749	66.2	TP
15	Squat	50	70	4	5	0.92733	0.9	68.6429	67.7	TP
15	Squat	70	98	4	1	0.757382	0.89	70.2806	68.4	TP
15	Squat	70	98	4	2	0.751772	0.86	70.3098	70	TP
15	Squat	70	98	4	3	0.652333	0.75	69.5188	67.3	TP
15	Squat	70	98	4	4	0.633109	0.71	71.6119	69.5	TP
15	Squat	70	98	4	5	0.635352	0.71	71.3425	69.1	TP
15	Squat	90	125	4	1	0.560495	0.62	72.8416	68.3	TP
15	Squat	90	125	4	2	0.509764	0.58	70.5687	66.7	TP
15	Squat	90	125	4	3	0.416758	0.44	72.4822	69.7	TP
15	Squat	100	140	4	1	0.415549	0.47	70.4632	67.5	TP
16	Squat	25	17	4	1	0.760233	1.01	42.8815	43.7	TP
16	Squat	25	17	4	2	0.829165	1.07	44.8282	46.7	TP
16	Squat	25	17	4	3	0.820597	1.18	45.9218	46.7	TP
16	Squat	25	17	4	4	0.822841	1.08	47.3814	49	TP
16	Squat	25	17	4	5	0.821518	1.03	47.26	48.7	TP
16	Squat	50	35	4	1	0.623593	0.8	41.664	40.6	TP
16	Squat	50	35	4	2	0.629098	0.82	43.2097	45.8	TP
16	Squat	50	35	4	3	0.636741	0.76	43.6905	45.5	TP
16	Squat	50	35	4	4	0.650259	0.78	43.3355	44	TP
16	Squat	50	35	4	5	0.614366	0.79	42.7356	46.4	TP
16	Squat	70	48	4	1	0.519057	0.62	40.6168	42	TP
16	Squat	70	48	4	2	0.518141	0.62	41.765	42.4	TP
16	Squat	70	48	4	3	0.506247	0.6	42.308	44.4	TP
16	Squat	70	48	4	4	0.502213	0.67	42.9277	45.8	TP
16	Squat	70	48	4	5	0.48827	0.58	42.5679	44.3	TP
16	Squat	90	60	4	1	0.392579	0.49	40.6479	39.5	TP
16	Squat	90	60	4	2	0.366914	0.44	41.0101	38.1	TP
16	Squat	90	60	4	3	0.347488	0.43	42.2073	41.7	TP
16	Squat	100	68	4	1	0.274921	0.32	40.8034	43.9	TP
17	Squat	25	50	4	1	1.20637	1.53	66.0511	70.9	TP
17	Squat	25	50	4	2	1.20619	1.5	66.2323	71.9	TP
17	Squat	25	50	4	3	1.17656	1.51	67.8761	72.3	TP
17	Squat	25	50	4	4	1.20998	1.51	69.5214	73.1	TP
17	Squat	25	50	4	5	1.21835	1.55	73.1357	74.5	TP
17	Squat	50	100	4	1	0.968956	0.76	66.3748	50.5	TP
17	Squat	50	100	4	2	0.969652	0.81	69.1878	55.7	TP
17	Squat	50	100	4	3	0.978765	1.12	67.091	66.1	TP
17	Squat	50	100	4	4	0.960368	1.01	69.985	65.5	TP
17	Squat	50	100	4	5	0.968	1.03	75.1699	71.4	TP
17	Squat	70	140	4	1	0.767595	0.8	66.0389	61.6	TP
17	Squat	70	140	4	2	0.701394	0.68	64.9384	60.1	TP
17	Squat	70	140	4	3	0.691041	0.7	64.4186	58.8	TP
17	Squat	70	140	4	4	0.662169	0.72	64.7155	61.7	TP
17	Squat	70	140	4	5	0.684911	0.78	69.0703	64.8	TP
17	Squat	90	180	4	1	0.520382	0.63	62.7666	60.3	TP
17	Squat	90	180	4	2	0.452436	0.6	65.1111	61.1	TP
17	Squat	90	180	4	3	0.420411	0.51	67.8864	64.6	TP
17	Squat	100	200	4	1	0.287309	0.34	66.0142	66.1	TP
18	Squat	25	15	4	1	0.877585	1.16	45.9779	47.7	TP
18	Squat	25	15	4	2	0.847433	1.06	45.1821	46.7	TP
18	Squat	25	15	4	3	0.806943	0.88	44.0684	45.1	TP
18	Squat	25	15	4	4	0.850554	1.01	47.3466	49	TP
18	Squat	25	15	4	5	0.833127	1.18	47.74	49.3	TP
18	Squat	50	18	4	1	0.800208	0.95	49.6506	50.6	TP
18	Squat	50	18	4	2	0.820716	0.96	51.6099	51.7	TP
18	Squat	50	18	4	3	0.751603	0.88	47.8989	46.9	TP
18	Squat	50	18	4	4	0.693258	0.89	46.7179	46	TP
18	Squat	50	18	4	5	0.757078	0.95	48.1721	47.7	TP
18	Squat	70	30	4	1	0.713392	0.87	47.6645	49	TP
18	Squat	70	30	4	2	0.6723	0.79	46.8636	47.5	TP
18	Squat	70	30	4	3	0.64319	0.78	45.6681	46	TP
18	Squat	70	30	4	4	0.625607	0.79	46.9626	47.1	TP
18	Squat	70	30	4	5	0.6385	0.78	47.1387	49.1	TP
18	Squat	90	40	4	1	0.53845	0.65	43.3016	46.2	TP
18	Squat	90	40	4	2	0.47591	0.67	38.5415	39.9	TP
18	Squat	90	40	4	3	0.438517	0.52	39.0665	39.9	TP
18	Squat	100	45	4	1	0.32994	0.44	37.6959	39.3	TP
19	Squat	25	15	4	1	0.906608	1.08	49.5827	51.6	TP
19	Squat	25	15	4	2	0.898481	1.09	48.393	48.1	TP
19	Squat	25	15	4	3	0.98892	1.35	52.1307	53.6	TP
19	Squat	25	15	4	4	1.0146	1.28	53.0804	55.2	TP
19	Squat	25	15	4	5	0.975382	1.14	52.9382	54	TP
19	Squat	50	18	4	1	0.627633	0.98	50.7203	55.7	TP
19	Squat	50	18	4	2	0.69496	0.8	52.1172	51.4	TP
19	Squat	50	18	4	3	0.891693	0.99	56.3422	55.7	TP
19	Squat	50	18	4	4	0.885865	0.95	56.9144	54.6	TP
19	Squat	50	18	4	5	0.785888	0.93	55.7013	54.9	TP
19	Squat	70	30	4	1	0.398121	0.58	48.47	50.9	TP
19	Squat	70	30	4	2	0.510189	0.75	50.2598	49.4	TP
19	Squat	70	30	4	3	0.592559	0.74	50.3398	50.1	TP
19	Squat	70	30	4	4	0.675675	0.8	50.5551	51.2	TP
19	Squat	70	30	4	5	0.516461	0.8	51.3837	53.2	TP
19	Squat	90	40	4	1	0.265968	0.44	52.2816	53.1	TP
19	Squat	90	40	4	2	0.285927	0.45	52.9391	54.1	TP
19	Squat	90	40	4	3	0.263372	0.43	51.1638	51.7	TP
19	Squat	100	45	4	1	0.269597	0.31	54.9222	56.8	TP
20	Squat	25	28	4	1	1.05086	1.18	57.5877	58.5	TP
20	Squat	25	28	4	2	1.02602	1.14	54.2669	56.6	TP
20	Squat	25	28	4	3	0.951268	1.08	61.0802	63.7	TP
20	Squat	25	28	4	4	1.0033	1.14	59.3045	59.1	TP
20	Squat	25	28	4	5	1.0386	1.17	60.0248	62.5	TP
20	Squat	50	55	4	1	0.900225	1.06	55.0272	57.4	TP
20	Squat	50	55	4	2	0.911041	1.11	61.0017	63.1	TP
20	Squat	50	55	4	3	0.894879	1.06	56.2101	58.4	TP
20	Squat	50	55	4	4	0.830631	1	55.8956	59.2	TP
20	Squat	50	55	4	5	0.887803	1.06	61.5308	63.1	TP
20	Squat	70	77	4	1	0.729421	0.9	51.6312	54.3	TP
20	Squat	70	77	4	2	0.690149	0.81	55.7539	56.5	TP
20	Squat	70	77	4	3	0.644575	0.77	54.3625	54.5	TP
20	Squat	70	77	4	4	0.653868	0.81	56.5966	57.9	TP
20	Squat	70	77	4	5	0.584479	0.68	52.5235	52.3	TP
20	Squat	90	100	4	1	0.292016	0.34	47.4033	44.2	TP
20	Squat	90	100	4	2	0.259996	0.29	45.4295	46.2	TP
20	Squat	90	100	4	3	0.261458	0.3	45.5459	45.8	TP
20	Squat	100	110	4	1	0.25098	0.34	46.7964	47.1	TP
21	Squat	25	28	4	1	0.994523	1.06	57.9457	57.3	TP
21	Squat	25	28	4	2	0.917987	0.95	57.1614	57.5	TP
21	Squat	25	28	4	3	0.948929	0.98	59.0348	57.7	TP
21	Squat	25	28	4	4	0.922521	0.97	57.6276	55.6	TP
21	Squat	25	28	4	5	0.915422	0.97	57.8181	57	TP
21	Squat	50	55	4	1	0.826266	0.88	57.7512	57.5	TP
21	Squat	50	55	4	2	0.826509	0.89	57.9918	58	TP
21	Squat	50	55	4	3	0.778762	0.81	54.6977	52.9	TP
21	Squat	50	55	4	4	0.752049	0.83	54.485	53.3	TP
21	Squat	50	55	4	5	0.737363	0.78	54.8331	52.3	TP
21	Squat	70	77	4	1	0.702644	0.76	57.205	58	TP
21	Squat	70	77	4	2	0.653005	0.68	56.6562	56.3	TP
21	Squat	70	77	4	3	0.624289	0.71	51.6709	51.3	TP
21	Squat	70	77	4	4	0.595983	0.66	53.5477	53.4	TP
21	Squat	70	77	4	5	0.579173	0.62	55.8234	55.9	TP
21	Squat	90	95	4	1	0.563794	0.62	56.8997	56.5	TP
21	Squat	90	95	4	2	0.497838	0.53	56.9075	55.7	TP
21	Squat	90	95	4	3	0.482403	0.51	55.9919	54.5	TP
21	Squat	100	110	4	1	0.470857	0.5	51.3131	51.7	TP
22	Squat	25	28	4	1	1.00202	1.09	55.1174	53.4	TP
22	Squat	25	28	4	2	1.0178	1.04	58.0848	55.9	TP
22	Squat	25	28	4	3	0.877217	0.91	59.3219	58.4	TP
22	Squat	25	28	4	4	1.05113	1.09	57.684	54.9	TP
22	Squat	25	28	4	5	0.935302	1.01	57.7953	57.8	TP
22	Squat	50	55	4	1	0.871727	0.92	51.5566	49.8	TP
22	Squat	50	55	4	2	0.852572	0.88	54.9998	53.1	TP
22	Squat	50	55	4	3	0.795611	0.8	55.8747	51.2	TP
22	Squat	50	55	4	4	0.796317	0.81	57.2456	53.4	TP
22	Squat	50	55	4	5	0.793896	0.79	56.36	53	TP
22	Squat	70	77	4	1	0.719192	0.79	48.1477	46.5	TP
22	Squat	70	77	4	2	0.706835	0.73	50.1612	46.3	TP
22	Squat	70	77	4	3	0.666657	0.7	51.3607	48.1	TP
22	Squat	70	77	4	4	0.641891	0.66	51.6524	48.5	TP
22	Squat	70	77	4	5	0.679251	0.66	53.8041	50.1	TP
22	Squat	90	95	4	1	0.595484	0.61	47.0252	43.9	TP
22	Squat	90	95	4	2	0.50763	0.51	50.6617	47.5	TP
22	Squat	90	95	4	3	0.545106	0.54	52.4826	49.3	TP
22	Squat	100	110	4	1	0.537739	0.49	51.2062	44.6	TP
23	Squat	25	28	4	1	1.00523	1.07	60.8528	61.2	TP
23	Squat	25	28	4	2	1.02945	1.05	61.3223	61.6	TP
23	Squat	25	28	4	3	1.04296	1.13	60.4193	60.6	TP
23	Squat	25	28	4	4	1.11319	1.16	61.6009	62.3	TP
23	Squat	25	28	4	5	1.08265	1.15	62.8817	63.9	TP
23	Squat	50	58	4	1	0.850581	0.9	57.4805	57.3	TP
23	Squat	50	58	4	2	0.831623	0.89	57.5762	56.8	TP
23	Squat	50	58	4	3	0.84542	0.92	58.4773	58.9	TP
23	Squat	50	58	4	4	0.827231	0.88	58.4117	57.6	TP
23	Squat	50	58	4	5	0.83856	0.9	60.9877	60.7	TP
23	Squat	70	80	4	1	0.729655	0.73	58.7471	55.5	TP
23	Squat	70	80	4	2	0.677163	0.7	57.7167	56.1	TP
23	Squat	70	80	4	3	0.641539	0.65	53.7547	51.9	TP
23	Squat	70	80	4	4	0.665046	0.68	57.7315	56	TP
23	Squat	70	80	4	5	0.650419	0.64	59.2642	56	TP
23	Squat	90	103	4	1	0.504561	0.54	59.115	57.2	TP
23	Squat	90	103	4	2	0.47338	0.49	58.8595	57.5	TP
23	Squat	90	103	4	3	0.4702	0.49	59.9141	58.2	TP
23	Squat	100	115	4	1	0.358149	0.38	60.1465	57.7	TP
24	Squat	25	25	4	1	0.966368	1.01	58.5686	58	TP
24	Squat	25	25	4	2	1.001	1.1	59.2139	60.5	TP
24	Squat	25	25	4	3	0.996268	1.09	62.7967	64	TP
24	Squat	25	25	4	4	0.972933	1.08	61.8549	63.2	TP
24	Squat	25	25	4	5	0.997519	1.04	62.593	63.1	TP
24	Squat	50	45	4	1	0.75492	0.87	55.8976	56.7	TP
24	Squat	50	45	4	2	0.840343	0.91	57.6939	59.6	TP
24	Squat	50	45	4	3	0.835647	0.9	60.8661	61.9	TP
24	Squat	50	45	4	4	0.810795	0.81	57.7606	55.4	TP
24	Squat	50	45	4	5	0.748998	0.79	63.0512	63.4	TP
24	Squat	70	63	4	1	0.664577	0.73	58.8845	59.7	TP
24	Squat	70	63	4	2	0.647249	0.69	59.104	60.3	TP
24	Squat	70	63	4	3	0.611743	0.65	60.8267	60.8	TP
24	Squat	70	63	4	4	0.643637	0.65	60.7539	58.8	TP
24	Squat	70	63	4	5	0.630449	0.62	60.7087	57.6	TP
24	Squat	90	80	4	1	0.540144	0.57	45.27	44	TP
24	Squat	90	80	4	2	0.527205	0.56	49.9788	49.1	TP
24	Squat	90	80	4	3	0.555103	0.58	49.3198	48.9	TP
24	Squat	100	90	4	1	0.384797	0.4	55.5087	55	TP
1	Squat	25	15	5	1	0.882561	1.11	55.5344	58.2	TP
1	Squat	25	15	5	2	0.804045	1.11	57.5789	59	TP
1	Squat	25	15	5	3	0.737831	0.9	60.3321	60.6	TP
1	Squat	25	15	5	4	0.787147	0.92	59.1487	60.9	TP
1	Squat	25	15	5	5	0.710708	0.77	60.2796	61	TP
1	Squat	50	30	5	1	0.763842	0.85	55.4876	54.9	TP
1	Squat	50	30	5	2	0.639708	0.74	55.6217	56.4	TP
1	Squat	50	30	5	3	0.622586	0.7	52.5204	51.5	TP
1	Squat	50	30	5	4	0.681151	0.76	56.9383	57.3	TP
1	Squat	50	30	5	5	0.629146	0.7	55.8897	55.8	TP
1	Squat	70	42	5	1	0.650933	0.83	53.6285	55.7	TP
1	Squat	70	42	5	2	0.612957	0.79	53.75	56.6	TP
1	Squat	70	42	5	3	0.624136	0.76	55.24	55.9	TP
1	Squat	70	42	5	4	0.57632	0.7	53.5034	56.6	TP
1	Squat	70	42	5	5	0.542568	0.75	54.5286	58.2	TP
1	Squat	90	53	5	1	0.551932	0.63	55.4635	58.2	TP
1	Squat	90	53	5	2	0.454525	0.57	51.4619	56	TP
1	Squat	90	53	5	3	0.449482	0.56	52.7494	59.8	TP
1	Squat	100	60	5	1	0.298055	0.56	50.6309	51.6	TP
2	Squat	25	18	5	1	1.05044	1.17	52.5337	51	TP
2	Squat	25	18	5	2	1.02271	1.29	50.0292	51.2	TP
2	Squat	25	18	5	3	1.18536	1.35	51.23	51.3	TP
2	Squat	25	18	5	4	1.18853	1.31	50.8833	51.6	TP
2	Squat	25	18	5	5	1.17116	1.37	51.5559	52.2	TP
2	Squat	50	38	5	1	0.858461	0.91	57.7768	55.9	TP
2	Squat	50	38	5	2	0.881238	0.93	56.6186	54.5	TP
2	Squat	50	38	5	3	0.89857	0.98	56.8498	56	TP
2	Squat	50	38	5	4	0.914079	1.01	55.4056	55.5	TP
2	Squat	50	38	5	5	0.932193	1.02	54.1829	55	TP
2	Squat	70	52	5	1	0.793862	0.91	55.4226	56.6	TP
2	Squat	70	52	5	2	0.80158	0.9	56.3507	58.7	TP
2	Squat	70	52	5	3	0.789125	0.91	56.4802	59.2	TP
2	Squat	70	52	5	4	0.793098	0.91	57.3565	60.3	TP
2	Squat	70	52	5	5	0.805217	0.92	56.0846	59.3	TP
2	Squat	90	68	5	1	0.675591	0.8	56.3461	54.4	TP
2	Squat	90	68	5	2	0.734409	0.82	52.9507	51.9	TP
2	Squat	90	68	5	3	0.652765	0.84	57.4188	59.7	TP
2	Squat	100	75	5	1	0.251669	0.32	52.6429	50.4	TP
3	Squat	25	15	5	1	0.496385	0.62	46.1226	47	TP
3	Squat	25	15	5	2	0.703039	0.9	49.9288	47.1	TP
3	Squat	25	15	5	3	0.756813	0.96	49.7773	49.1	TP
3	Squat	25	15	5	4	0.698454	0.83	53.1196	52	TP
3	Squat	25	15	5	5	0.739875	0.91	55.2657	54.1	TP
3	Squat	50	32	5	1	0.655368	0.72	43.4857	41	TP
3	Squat	50	32	5	2	0.6717	0.73	42.2246	40.2	TP
3	Squat	50	32	5	3	0.590034	0.65	40.6378	39.8	TP
3	Squat	50	32	5	4	0.59062	0.65	41.7037	39.9	TP
3	Squat	50	32	5	5	0.620224	0.67	41.1811	39.3	TP
3	Squat	70	45	5	1	0.520804	0.77	37.1555	36.3	TP
3	Squat	70	45	5	2	0.438437	0.6	38.6956	37.4	TP
3	Squat	70	45	5	3	0.494045	0.71	37.2319	37	TP
3	Squat	70	45	5	4	0.464316	0.73	37.7339	38.6	TP
3	Squat	70	45	5	5	0.446139	0.74	38.0338	39.1	TP
3	Squat	90	57	5	1	0.526142	0.77	35.6024	34.6	TP
3	Squat	90	57	5	2	0.448822	0.71	37.396	36.1	TP
3	Squat	90	57	5	3	0.424628	0.56	39.8014	38.3	TP
3	Squat	100	63	5	1	0.384044	0.51	34.3961	34.5	TP
4	Squat	25	22	5	1	0.695895	0.85	53.426	54.3	TP
4	Squat	25	22	5	2	0.759269	0.86	56.8088	58.1	TP
4	Squat	25	22	5	3	0.818088	0.97	56.6138	57.9	TP
4	Squat	25	22	5	4	0.793857	0.93	56.9793	56	TP
4	Squat	25	22	5	5	0.653443	0.94	55.8029	56.4	TP
4	Squat	50	42	5	1	0.74	0.9	49.82	55.1	TP
4	Squat	50	42	5	2	0.74	0.9	52.18	56.3	TP
4	Squat	50	42	5	3	0.73	0.88	52.54	58.3	TP
4	Squat	50	42	5	4	0.73	0.87	52.39	55.9	TP
4	Squat	50	42	5	5	0.73	0.85	52.38	54.9	TP
4	Squat	70	60	5	1	0.629008	0.7	46.7742	47.9	TP
4	Squat	70	60	5	2	0.5858	0.63	50.6181	49.7	TP
4	Squat	70	60	5	3	0.589648	0.68	52.3576	53.1	TP
4	Squat	70	60	5	4	0.596855	0.69	50.9497	51.9	TP
4	Squat	70	60	5	5	0.580732	0.66	51.7619	52.9	TP
4	Squat	90	77	5	1	0.495015	0.7	43.9209	46.2	TP
4	Squat	90	77	5	2	0.456521	0.57	48.1182	47.5	TP
4	Squat	90	77	5	3	0.398466	0.5	50.6018	52.6	TP
4	Squat	100	85	5	1	0.323134	0.41	49.2848	51.2	TP
5	Squat	25	40	5	1	1.11147	1.25	63.3572	66	TP
5	Squat	25	40	5	2	1.10056	1.26	63.3887	66.9	TP
5	Squat	25	40	5	3	1.11016	1.25	63.5264	65.1	TP
5	Squat	25	40	5	4	1.07331	1.2	64.1147	65.9	TP
5	Squat	25	40	5	5	1.18268	1.3	67.1489	67.9	TP
5	Squat	50	78	5	1	0.90818	1.06	64.8005	64.2	TP
5	Squat	50	78	5	2	0.876887	1.07	65.3685	65.2	TP
5	Squat	50	78	5	3	0.909705	1.14	64.409	65.4	TP
5	Squat	50	78	5	4	0.90737	1.15	64.5549	64.8	TP
5	Squat	50	78	5	5	0.862934	1	66.6815	66.8	TP
5	Squat	70	108	5	1	0.782012	0.93	63.9204	64	TP
5	Squat	70	108	5	2	0.749922	1	67.5321	65.2	TP
5	Squat	70	108	5	3	0.769455	0.99	65.8444	64.5	TP
5	Squat	70	108	5	4	0.748357	0.93	64.231	63.5	TP
5	Squat	70	108	5	5	0.770126	1.03	65.325	65.3	TP
5	Squat	90	140	5	1	0.592519	0.64	67.4243	65.5	TP
5	Squat	90	140	5	2	0.545659	0.57	69.7402	67.4	TP
5	Squat	90	140	5	3	0.485091	0.55	66.9818	66.8	TP
5	Squat	100	155	5	1	0.511752	0.55	67.8341	66.6	TP
6	Squat	25	15	5	1	0.788835	0.98	54.3626	53.8	TP
6	Squat	25	15	5	2	0.822044	1.05	57.0222	59.7	TP
6	Squat	25	15	5	3	0.818831	0.93	57.4974	59.4	TP
6	Squat	25	15	5	4	0.813836	0.92	60.1266	60.8	TP
6	Squat	25	15	5	5	0.801625	0.98	62.1208	63	TP
6	Squat	50	28	5	1	0.614361	0.71	52.9297	52.9	TP
6	Squat	50	28	5	2	0.676008	0.87	53.1945	53.3	TP
6	Squat	50	28	5	3	0.66928	0.78	53.7445	54.4	TP
6	Squat	50	28	5	4	0.641045	0.75	54.2177	54.9	TP
6	Squat	50	28	5	5	0.621343	0.74	55.8559	56.4	TP
6	Squat	70	38	5	1	0.564678	0.58	53.7972	50.8	TP
6	Squat	70	38	5	2	0.56025	0.59	51.54	50.3	TP
6	Squat	70	38	5	3	0.560015	0.59	53.9897	53.5	TP
6	Squat	70	38	5	4	0.576419	0.63	55.196	55.5	TP
6	Squat	70	38	5	5	0.547237	0.57	54.322	52.6	TP
6	Squat	90	50	5	1	0.417127	0.53	49.5066	53	TP
6	Squat	90	50	5	2	0.424572	0.56	49.502	52.7	TP
6	Squat	90	50	5	3	0.375691	0.5	50.5524	54.2	TP
6	Squat	100	55	5	1	0.424991	0.56	50.3052	52	TP
7	Squat	25	28	5	1	0.951371	0.99	58.8989	54.7	TP
7	Squat	25	28	5	2	0.996863	1.05	64.1016	62.2	TP
7	Squat	25	28	5	3	1.01384	1.07	64.1131	61.4	TP
7	Squat	25	28	5	4	1.00187	1.07	64.8392	63.5	TP
7	Squat	25	28	5	5	0.964578	1.06	65.0259	63	TP
7	Squat	50	55	5	1	0.763744	0.81	56.2726	55	TP
7	Squat	50	55	5	2	0.743838	0.8	52.0522	51.4	TP
7	Squat	50	55	5	3	0.761612	0.84	55.9103	55.4	TP
7	Squat	50	55	5	4	0.738533	0.8	56.0693	55.7	TP
7	Squat	50	55	5	5	0.585125	0.66	56.3983	54.6	TP
7	Squat	70	77	5	1	0.594078	0.67	52.3413	50.4	TP
7	Squat	70	77	5	2	0.602798	0.7	50.4463	48.9	TP
7	Squat	70	77	5	3	0.57382	0.68	49.4728	47	TP
7	Squat	70	77	5	4	0.572995	0.65	49.2448	48	TP
7	Squat	70	77	5	5	0.551512	0.63	49.8925	47.8	TP
7	Squat	90	98	5	1	0.461282	0.57	45.6633	44.6	TP
7	Squat	90	98	5	2	0.416162	0.5	44.7188	41.8	TP
7	Squat	90	98	5	3	0.412745	0.47	44.7226	43.1	TP
7	Squat	100	110	5	1	0.395197	0.49	43.6692	41.5	TP
8	Squat	25	20	5	1	0.84454	0.93	52.2296	53.5	TP
8	Squat	25	20	5	2	0.785306	0.88	51.6331	52.3	TP
8	Squat	25	20	5	3	0.890328	1	57.5233	57	TP
8	Squat	25	20	5	4	0.888069	0.93	55.6579	52.4	TP
8	Squat	25	20	5	5	0.957104	1.08	57.8985	57.2	TP
8	Squat	50	40	5	1	0.784013	0.87	52.8027	53	TP
8	Squat	50	40	5	2	0.761644	0.89	53.7841	56	TP
8	Squat	50	40	5	3	0.771314	0.91	57.8072	60.4	TP
8	Squat	50	40	5	4	0.794143	0.9	56.4051	59.1	TP
8	Squat	50	40	5	5	0.746397	0.85	54.7633	56.9	TP
8	Squat	70	55	5	1	0.664146	0.81	51.6186	48	TP
8	Squat	70	55	5	2	0.661799	0.73	54.2321	53.7	TP
8	Squat	70	55	5	3	0.668626	0.81	54.8014	55.4	TP
8	Squat	70	55	5	4	0.655137	0.79	54.302	56.2	TP
8	Squat	70	55	5	5	0.646853	0.8	54.0949	59	TP
8	Squat	90	72	5	1	0.513388	0.59	48.9043	49.2	TP
8	Squat	90	72	5	2	0.527849	0.62	51.2337	52.1	TP
8	Squat	90	72	5	3	0.481808	0.58	51.3222	53	TP
8	Squat	100	80	5	1	0.261092	0.3	46.196	44.5	TP
9	Squat	25	22	5	1	0.884229	1.03	52.0898	54.6	TP
9	Squat	25	22	5	2	0.697538	0.81	49.3984	50.1	TP
9	Squat	25	22	5	3	0.771066	0.85	49.5645	50	TP
9	Squat	25	22	5	4	0.788711	0.86	52.6709	52.2	TP
9	Squat	25	22	5	5	0.81068	0.87	53.4701	50.7	TP
9	Squat	50	42	5	1	0.594411	0.7	44.9249	45.6	TP
9	Squat	50	42	5	2	0.599646	0.72	46.0323	48.3	TP
9	Squat	50	42	5	3	0.601116	0.7	44.9854	47	TP
9	Squat	50	42	5	4	0.579878	0.74	44.936	46.9	TP
9	Squat	50	42	5	5	0.521933	0.64	46.7601	47.4	TP
9	Squat	70	60	5	1	0.528844	0.63	42.8732	41.4	TP
9	Squat	70	60	5	2	0.498796	0.6	45.8679	47.2	TP
9	Squat	70	60	5	3	0.499412	0.59	43.5897	40.9	TP
9	Squat	70	60	5	4	0.436982	0.53	43.7994	43.6	TP
9	Squat	70	60	5	5	0.443473	0.54	42.3526	42.1	TP
9	Squat	90	77	5	1	0.399268	0.52	38.5088	38	TP
9	Squat	90	77	5	2	0.377107	0.48	41.0492	39.6	TP
9	Squat	90	77	5	3	0.376873	0.46	38.8894	37.9	TP
9	Squat	100	85	5	1	0.405071	0.53	39.4963	37.7	TP
10	Squat	25	22	5	1	0.857554	0.92	47.4242	45.9	TP
10	Squat	25	22	5	2	0.871685	0.97	50.4478	49.8	TP
10	Squat	25	22	5	3	0.917504	1	51.0716	50.4	TP
10	Squat	25	22	5	4	0.839747	0.87	49.2189	47.7	TP
10	Squat	25	22	5	5	0.914235	1.03	52.8861	52.2	TP
10	Squat	50	43	5	1	0.778909	0.9	48.0595	48.5	TP
10	Squat	50	43	5	2	0.740994	0.81	47.8759	46.9	TP
10	Squat	50	43	5	3	0.747814	0.83	50.9287	50.5	TP
[truncated: 276 more rows]

## Sheet: Bench Press
ID	Exercise	Load (%1RM)	Load (KG)	Camera	Rep	VEL_VICON_MID	VEL_METRIC	ROM_VICON_MID	ROM_METRIC	TP / FP / FN
1	Bench	50	17	1	1	0.846758		41.6237		Error
1	Bench	50	17	1	2	0.851376		42.7115		Error
1	Bench	50	17	1	3	0.924967		44.3793		Error
1	Bench	50	17	1	4	0.940691		44.5946		Error
1	Bench	50	17	1	5	0.77134		43.4422		Error
1	Bench	70	23	1	1	0.539444		39.8609		Error
1	Bench	70	23	1	2	0.53499		40.6532		Error
1	Bench	70	23	1	3	0.552992		41.9973		Error
1	Bench	70	23	1	4	0.541417		42.8056		Error
1	Bench	70	23	1	5	0.516183		41.8755		Error
1	Bench	90	30	1	1	0.311992		39.4202		Error
1	Bench	90	30	1	2	0.320175		42.5304		Error
1	Bench	90	30	1	3	0.312305		42.1801		Error
1	Bench	100	33	1	1	0.293631		41.3133		Error
2	Bench	50	20	1	1		0.36		26.8	FP
2	Bench	50	20	1	2	0.891312	1.02	50.8823	50.3	TP
2	Bench	50	20	1	3	0.949777	1.07	51.242	51	TP
2	Bench	50	20	1	4	0.88329	1	49.9381	48.7	TP
2	Bench	50	20	1	5	0.871385	0.99	51.9498	52.4	TP
2	Bench	50	20	1	6	0.849636	0.86	47.9704	43.7	TP
2	Bench	70	27	1	1		0.33		26.7	FP
2	Bench	70	27	1	2	0.691025	0.73	49.8768	48.1	TP
2	Bench	70	27	1	3	0.75766	0.79	50.9267	48.7	TP
2	Bench	70	27	1	4	0.665501	0.67	51.324	47.6	TP
2	Bench	70	27	1	5	0.620963	0.64	49.1959	45.1	TP
2	Bench	70	27	1	6	0.533274	0.57	48.7639	48.6	TP
2	Bench	90	35	1	1		0.23		23.6	FP
2	Bench	90	35	1	2	0.516184	0.66	46.8902	46.8	TP
2	Bench	90	35	1	3	0.418045	0.4	48.6893	45.8	TP
2	Bench	90	35	1	4	0.422342	0.53	50.6757	48.8	TP
2	Bench	100	38	1	1		0.33		21.5	FP
2	Bench	100	38	1	2	0.275664	0.35	48.3439	45.3	TP
3	Bench	50	15	1	1	0.583081	0.77	33.2906	30.4	TP
3	Bench	50	15	1	2	0.727048	0.93	38.5296	38.5	TP
3	Bench	50	15	1	3	0.717768	1.01	39.7825	40.4	TP
3	Bench	50	15	1	4	0.678181	1.02	38.9842	41.3	TP
3	Bench	50	15	1	5	0.742934	0.91	40.8605	43	TP
3	Bench	70	22	1	1	0.521758	0.75	35.3834	35.8	TP
3	Bench	70	22	1	2	0.486043	0.73	37.7104	38.6	TP
3	Bench	70	22	1	3	0.481299	0.73	35.8726	37.9	TP
3	Bench	70	22	1	4	0.44281	0.61	35.9652	36.2	TP
3	Bench	70	22	1	5	0.475525	0.65	39.1731	42.3	TP
3	Bench	90	27	1	1	0.379548	0.4	30.5402	28.8	TP
3	Bench	90	27	1	2	0.366278	0.45	31.8103	30.4	TP
3	Bench	90	27	1	3	0.295662	0.33	32.3778	32.7	TP
3	Bench	100	30	1	1	0.274595	0.49	29.5944	29.9	TP
4	Bench	50	28	1	1	0.470257		28.1895		Error
4	Bench	50	28	1	2	0.494397		29.1183		Error
4	Bench	50	28	1	3	0.586657		31.2669		Error
4	Bench	50	28	1	4	0.592339		32.1235		Error
4	Bench	50	28	1	5	0.602623		33.4646		Error
4	Bench	90	50	1	1	0.371848		30.5423		Error
4	Bench	90	50	1	2	0.394585		29.9109		Error
4	Bench	90	50	1	3	0.39477		30.1529		Error
4	Bench	100	55	1	1	0.295313	0.37	29.1722	29.7	TP
5	Bench	50	55	1	1	0.863208		42.7249		Error
5	Bench	50	55	1	2	0.855675		42.7669		Error
5	Bench	50	55	1	3	0.866697		42.7419		Error
5	Bench	50	55	1	4	0.857066		42.8325		Error
5	Bench	50	55	1	5	0.900842		45.4444		Error
5	Bench	70	77	1	1	0.580877	0.72	38.9187	40.7	TP
5	Bench	70	77	1	2	0.562827	0.71	38.5094	37.6	TP
5	Bench	70	77	1	3	0.528485	0.62	38.2997	39.7	TP
5	Bench	70	77	1	4	0.525164	0.67	38.9154	39.8	TP
5	Bench	70	77	1	5	0.485255	0.59	40.2245	40.7	TP
5	Bench	90	100	1	1	0.320901	0.35	39.9503	39.8	TP
5	Bench	90	100	1	2	0.226975	0.25	39.4656	39.7	TP
5	Bench	90	100	1	3	0.258762	0.27	41.0646	39.7	TP
5	Bench	100	105	1	1	0.261707	0.35	40.6916	43.1	TP
6	Bench	50	25	1	1	0.761336		40.342		Error
6	Bench	50	25	1	2	0.769886		41.5687		Error
6	Bench	50	25	1	3	0.7594		42.8667		Error
6	Bench	50	25	1	4	0.772264		43.4917		Error
6	Bench	50	25	1	5	0.762396		42.2967		Error
6	Bench	70	35	1	1	0.622192	0.75	40.3276	39.9	TP
6	Bench	70	35	1	2	0.598757	0.77	41.9967	39.2	TP
6	Bench	70	35	1	3	0.546514	0.7	41.8512	41.3	TP
6	Bench	70	35	1	4	0.53037	0.72	42.2685	41.4	TP
6	Bench	70	35	1	5	0.51668	0.66	41.7655	44.5	TP
6	Bench	90	45	1	1	0.365164	0.44	39.8487	42.9	TP
6	Bench	90	45	1	2	0.302428	0.35	39.812	40.9	TP
6	Bench	90	45	1	3	0.235602	0.32	38.7794	37.1	TP
6	Bench	100	50	1	1	0.149984	0.5	34.2821	29.3	TP
7	Bench	50	35	1	1		0.45		25.2	FP
7	Bench	50	35	1	2	0.803311	0.86	44.1222	42.7	TP
7	Bench	50	35	1	3	0.902683	0.91	49.6394	43.8	TP
7	Bench	50	35	1	4	0.887691	0.94	48.6427	45.2	TP
7	Bench	50	35	1	5	0.861603	0.91	50.2072	45.9	TP
7	Bench	50	35	1	6	0.787348	0.85	47.0039	45.1	TP
7	Bench	70	50	1	1	0.589802	0.58	43.1499	38.3	TP
7	Bench	70	50	1	2	0.586964	0.65	42.487	38.5	TP
7	Bench	70	50	1	3	0.460512	0.45	40.2323	34.5	TP
7	Bench	70	50	1	4	0.549498	0.56	39.6676	35.4	TP
7	Bench	70	50	1	5	0.539412	0.57	37.9896	34	TP
7	Bench	90	63	1	1	0.421146	0.49	37.1953	32	TP
7	Bench	90	63	1	2	0.372532	0.46	35.4158	32.7	TP
7	Bench	90	63	1	3	0.360562	0.4	33.3627	31.4	TP
7	Bench	100	70	1	1		0.25		21.8	FP
7	Bench	100	70	1	2	0.326844	0.34	33.8777	30.3	TP
8	Bench	50	22	1	1		0.34		25.7	FP
8	Bench	50	22	1	2	0.706516	0.89	45.2108	46.7	TP
8	Bench	50	22	1	3	0.705056	0.89	46.6315	48.4	TP
8	Bench	50	22	1	4	0.654232	0.75	46.684	45.2	TP
8	Bench	50	22	1	5	0.65509	0.73	45.1804	43	TP
8	Bench	50	22	1	6	0.650731	0.76	47.4813	49.1	TP
8	Bench	70	32	1	1		0.36		25.6	FP
8	Bench	70	32	1	2	0.543265	0.64	44.5498	46.3	TP
8	Bench	70	32	1	3	0.586037	0.68	47.2373	43.1	TP
8	Bench	70	32	1	4	0.55432	0.67	46.7164	47.6	TP
8	Bench	70	32	1	5	0.540534	0.56	46.6103	40.8	TP
8	Bench	70	32	1	6	0.522016	0.57	46.1725	44.2	TP
8	Bench	90	40	1	1	0.336986	0.41	42.4264	40.3	TP
8	Bench	90	40	1	2	0.311149	0.37	42.6334	40.9	TP
8	Bench	90	40	1	3	0.295173	0.36	42.5947	43.2	TP
8	Bench	100	45	1	1	0.208516	0.27	41.2445	40.7	TP
9	Bench	50	40	1	1		0.28		21.8	FP
9	Bench	50	40	1	2	0.740041	0.82	40.6918	39.7	TP
9	Bench	50	40	1	3	0.768864	0.82	40.3938	37.7	TP
9	Bench	50	40	1	4	0.64873	0.67	39.2439	35.1	TP
9	Bench	50	40	1	5	0.71465	0.8	39.173	37.5	TP
9	Bench	50	40	1	6	0.737138	0.73	40.4284	35.2	TP
9	Bench	70	55	1	1	0.573915	0.65	38.5155	43.4	TP
9	Bench	70	55	1	2	0.531934	0.62	37.8639	33.8	TP
9	Bench	70	55	1	3	0.513424	0.55	39.3776	34.7	TP
9	Bench	70	55	1	4	0.50546	0.57	39.6031	34.9	TP
9	Bench	70	55	1	5	0.454059	0.56	39.1821	35	TP
9	Bench	90	72	1	1	0.321995	0.36	36.6042	34.8	TP
9	Bench	90	72	1	2	0.303913	0.32	36.0676	33.1	TP
9	Bench	90	72	1	3	0.17283	0.29	35.328	33.7	TP
9	Bench	100	80	1	1	0.178602	0.18	33.8313	31.9	TP
10	Bench	50	18	1	1		0.54		22	FP
10	Bench	50	18	1	2	0.921042	1.09	50.2821	50.8	TP
10	Bench	50	18	1	3	0.938507	1.06	48.9831	48.9	TP
10	Bench	50	18	1	4	0.886881	0.97	49.495	45.5	TP
10	Bench	50	18	1	5	0.967169	1.07	52.4512	50.5	TP
10	Bench	50	18	1	6	1.01232	1.12	56.6605	53.2	TP
10	Bench	70	25	1	1		0.4		15.3	FP
10	Bench	70	25	1	2	0.595295	0.61	44.785	41.1	TP
10	Bench	70	25	1	3	0.614047	0.68	47.1966	48.1	TP
10	Bench	70	25	1	4	0.596006	0.61	46.6682	43.6	TP
10	Bench	70	25	1	5	0.546858	0.56	45.4511	42.1	TP
10	Bench	70	25	1	6	0.481476	0.51	45.1994	43.8	TP
10	Bench	90	32	1	1		0.36		14.2	FP
10	Bench	90	32	1	2	0.269473	0.31	39.5381	40	TP
10	Bench	90	32	1	3	0.272843	0.31	40.4351	39	TP
10	Bench	90	32	1	4	0.259008	0.27	41.6938	37	TP
10	Bench	100	35	1	1	0.184449	0.27		18.4	TP
10	Bench	100	35	1	2		0.24	35.2807	35.6	FP
11	Bench	50	45	1	1	0.870152	0.99	43.6473	45.5	TP
11	Bench	50	45	1	2	0.870359	1.05	43.6231	44.9	TP
11	Bench	50	45	1	3	0.857097	0.94	43.0011	44.3	TP
11	Bench	50	45	1	4	0.83998	0.99	44.1504	47	TP
11	Bench	50	45	1	5	0.834473	0.99	45.2258	50.2	TP
11	Bench	70	63	1	1	0.669855	0.77	42.8597	45	TP
11	Bench	70	63	1	2	0.670587	0.73	44.213	45.4	TP
11	Bench	70	63	1	3	0.617779	0.63	43.9877	42.3	TP
11	Bench	70	63	1	4	0.60927	0.65	45.1053	45.5	TP
11	Bench	70	63	1	5	0.581802	0.62	46.3056	46.6	TP
11	Bench	90	80	1	1	0.461289	0.49	43.0579	44.2	TP
11	Bench	90	80	1	2	0.387105	0.41	43.3971	44.4	TP
11	Bench	90	80	1	3	0.343789	0.38	42.9994	45	TP
11	Bench	100	90	1	1	0.279796	0.29	42.1308	40.4	TP
12	Bench	50	48	1	1	0.702196	0.85	40.0035	40.6	TP
12	Bench	50	48	1	2	0.72168	0.77	41.4828	39.9	TP
12	Bench	50	48	1	3	0.72345	0.82	42.3053	42.5	TP
12	Bench	50	48	1	4	0.71729	0.8	41.218	41.2	TP
12	Bench	50	48	1	5	0.720473	0.82	42.496	42	TP
12	Bench	70	67	1	1	0.5501	0.6	38.1998	36.6	TP
12	Bench	70	67	1	2	0.488612	0.54	39.0551	39.3	TP
12	Bench	70	67	1	3	0.472393	0.54	39.8902	40.9	TP
12	Bench	70	67	1	4	0.478255	0.55	40.3714	41.3	TP
12	Bench	70	67	1	5	0.489652	0.54	40.4605	41.2	TP
12	Bench	90	85	1	2	0.262353	0.28	37.5142	36.7	TP
12	Bench	90	85	1	3	0.257787	0.27	37.2602	36.1	TP
12	Bench	100	95	1	1	0.183787	0.23	35.6134	35.8	TP
13	Bench	50	45	1	1	1.09345	1.1	50.766	45.7	TP
13	Bench	50	45	1	2	1.16332	1.18	51.3223	47.4	TP
13	Bench	50	45	1	3	1.19897	1.18	53.1648	48.8	TP
13	Bench	50	45	1	4	1.17085	1.2	51.5931	49.3	TP
13	Bench	50	45	1	5	1.1611	1.13	50.1737	46	TP
13	Bench	70	63	1	1	0.903044	0.96	50.7924	48.3	TP
13	Bench	70	63	1	2	0.915528	0.97	53.47	52.8	TP
13	Bench	70	63	1	3	0.876068	0.92	53.3822	52.3	TP
13	Bench	70	63	1	4	0.859741	0.9	53.6543	52.8	TP
13	Bench	70	63	1	5	0.823566	0.92	53.0266	54.4	TP
13	Bench	90	80	1	1	0.632954	0.66	49.2128	45.6	TP
13	Bench	90	80	1	2	0.53067	0.56	50.6729	49.7	TP
13	Bench	90	80	1	3	0.551655	0.56	50.3447	48.3	TP
13	Bench	100	90	1	1	0.495517	0.48	50.0939	45.2	TP
14	Bench	50	40	1	1	1.0054	1	49.761	46.3	TP
14	Bench	50	40	1	2	0.993876	1.01	51.8498	47.7	TP
14	Bench	50	40	1	3	0.908586	0.94	48.9136	45.6	TP
14	Bench	50	40	1	4	0.941374	0.98	50.0607	47	TP
14	Bench	50	40	1	5	0.891178	0.97	49.1751	47.6	TP
14	Bench	70	57	1	1	0.753834	0.8	48.4897	46.1	TP
14	Bench	70	57	1	2	0.770572	0.75	49.978	44.5	TP
14	Bench	70	57	1	3	0.726702	0.69	50.1204	44.4	TP
14	Bench	70	57	1	4	0.697912	0.68	49.1989	45.2	TP
14	Bench	70	57	1	5	0.742941	0.72	48.421	42.3	TP
14	Bench	90	72	1	1	0.571013	0.56	48.9358	45.1	TP
14	Bench	90	72	1	2	0.541305	0.51	49.4212	42.9	TP
14	Bench	90	72	1	3	0.470361	0.45	47.6334	43.3	TP
14	Bench	100	80	1	1	0.464337	0.44	47.6682	42.6	TP
15	Bench	50	53	1	1	1.00557	1.19	49.7759	47.9	TP
15	Bench	50	53	1	2	1.0046	1.07	51.7419	49.1	TP
15	Bench	50	53	1	3	0.961967	1.01	53.4268	49.8	TP
15	Bench	50	53	1	4	0.984848	1.04	52.6268	49.7	TP
15	Bench	50	53	1	5	0.949256	1.02	51.2404	48.4	TP
15	Bench	70	73	1	1	0.724906	0.74	48.995	45.6	TP
15	Bench	70	73	1	2	0.702424	0.73	47.9965	45.6	TP
15	Bench	70	73	1	3	0.703809	0.72	49.3689	46.7	TP
15	Bench	70	73	1	4	0.679808	0.67	48.6714	43.3	TP
15	Bench	70	73	1	5	0.586857	0.6	50.2295	48.2	TP
15	Bench	90	95	1	2	0.265524	0.3	46.4291	41.4	TP
15	Bench	90	95	1	3	0.230569	0.27	46.4189	41.1	TP
15	Bench	100	105	1	1	0.11978	0.13	47.0602	42.2	TP
16	Bench	50	18	1	1		0.52		21.5	FP
16	Bench	50	18	1	2	0.488254	0.57	37.8889	36.7	TP
16	Bench	50	18	1	3	0.619493	0.72	35.3058	34.4	TP
16	Bench	50	18	1	4	0.733579	0.82	39.1622	40.9	TP
16	Bench	50	18	1	5	0.771825	0.84	39.7406	37.1	TP
16	Bench	50	18	1	6	0.771233	0.85	39.2912	38.2	TP
16	Bench	70	25	1	1		0.51		21.5	FP
16	Bench	70	25	1	2	0.50094	0.64	35.9885	33	TP
16	Bench	70	25	1	3	0.508021	0.61	36.7514	35.5	TP
16	Bench	70	25	1	4	0.507637	0.59	38.3944	37.3	TP
16	Bench	70	25	1	5	0.458363	0.51	37.5374	34.3	TP
16	Bench	70	25	1	5	0.464857	0.56	37.0161	36.7	TP
16	Bench	90	33	1	1		0.5		20.2	FP
16	Bench	90	33	1	2	0.346012	0.45	32.536	27	TP
16	Bench	90	33	1	3	0.324435	0.43	35.8261	34.5	TP
16	Bench	90	33	1	4	0.291397	0.4	32.8046	30.4	TP
16	Bench	100	37	1	1		0.16		16.7	FP
16	Bench	100	37	1	2	0.197358	0.2	31.5951	28.2	TP
17	Bench	50	80	1	1	0.815227	0.94	35.2917	35.6	TP
17	Bench	50	80	1	2	0.870964	1	36.7259	36.5	TP
17	Bench	50	80	1	3	0.846257	0.9	36.5415	36.5	TP
17	Bench	50	80	1	4	0.843209	0.93	37.3856	38.6	TP
17	Bench	50	80	1	5	0.854185	0.95	37.8791	39.7	TP
17	Bench	70	112	1	1	0.539007	0.66	28.5107	28.7	TP
17	Bench	70	112	1	2	0.490275	0.53	32.8329	31.5	TP
17	Bench	70	112	1	3	0.542317	0.63	28.9444	30.2	TP
17	Bench	70	112	1	4	0.541148	0.6	29.6874	30.1	TP
17	Bench	70	112	1	5	0.527213	0.58	35.5098	36.3	TP
17	Bench	90	145	1	1	0.309876	0.35	26.5853	25.9	TP
17	Bench	90	145	1	2	0.275242	0.31	27.6296	25.4	TP
17	Bench	90	145	1	3	0.168754		33.6091		FN
17	Bench	100	160	1	1	0.185855	0.25	33.3922	34.9	TP
18	Bench	50	11	1	1	0.931191	0.98	46.8622	45.1	TP
18	Bench	50	11	1	2	0.845644	0.98	46.5077	49.5	TP
18	Bench	50	11	1	3	0.88323	0.93	45.8924	45.3	TP
18	Bench	50	11	1	4	0.863059	0.93	47.4399	45.1	TP
18	Bench	50	11	1	5	0.876469	1.04	47.7417	49.2	TP
18	Bench	70	18	1	1	0.60388	0.68	44.2176	42.2	TP
18	Bench	70	18	1	2	0.637252	0.76	45.8277	44	TP
18	Bench	70	18	1	3	0.545161	0.63	44.865	43.3	TP
18	Bench	70	18	1	4	0.557738	0.58	46.2775	42.2	TP
18	Bench	70	18	1	5	0.543127	0.68	44.1262	40.4	TP
18	Bench	90	22	1	1	0.391429	0.38	42.7578	44.1	TP
18	Bench	90	22	1	2	0.333185	0.45	41.6866	39.6	TP
18	Bench	90	22	1	3	0.301612	0.32	40.8735	36.4	TP
18	Bench	100	25	1	1	0.269412	0.27	42.0387	36.5	TP
19	Bench	50	11	1	1	1.04037	1.16	43.0202	43.9	TP
19	Bench	50	11	1	2	0.868841	1.03	43.8667	44	TP
19	Bench	50	11	1	3	0.914611	1.05	46.1422	46.8	TP
19	Bench	50	11	1	4	0.813842	0.98	45.1436	46.3	TP
19	Bench	50	11	1	5	0.920857	1.06	45.5785	44	TP
19	Bench	50	11	1	6	0.908872	1.15	46.6365	52.2	TP
19	Bench	70	18	1	1	0.680243	0.73	40.765	37.5	TP
19	Bench	70	18	1	2	0.597371	0.66	43.8582	36.9	TP
19	Bench	70	18	1	3	0.592088	0.75	44.8293	43.7	TP
19	Bench	70	18	1	4	0.672536	0.72	44.6101	41.7	TP
19	Bench	70	18	1	5	0.439248	0.49	43.9234	42.8	TP
19	Bench	90	22	1	1	0.378246	0.54	42.7374	43.6	TP
19	Bench	90	22	1	2	0.351354	0.44	43.4743	42.2	TP
19	Bench	90	22	1	3	0.401192	0.54	45.7353	46.4	TP
19	Bench	100	25	1	1	0.303965	0.34	46.1604	45.4	TP
20	Bench	50	25	1	1	0.990958	1.19	53.499	53.7	TP
20	Bench	50	25	1	2	1.02469	1.08	56.2057	53.1	TP
20	Bench	50	25	1	3	1.04318	1.09	56.9644	56.1	TP
20	Bench	50	25	1	4	1.01529	1.12	57.0927	58.1	TP
20	Bench	50	25	1	5	1.03846	1.13	58.9557	58.1	TP
20	Bench	70	35	1	1	0.793317	0.91	54.6081	55.5	TP
20	Bench	70	35	1	2	0.745678	0.79	54.4808	52	TP
20	Bench	70	35	1	3	0.686049	0.76	50.9164	50.1	TP
20	Bench	70	35	1	4	0.735395	0.85	53.9888	51.5	TP
20	Bench	70	35	1	5	0.697487	0.74	54.4447	52.7	TP
20	Bench	90	45	1	1	0.403428	0.48	51.9569	53.2	TP
20	Bench	90	45	1	2	0.378081	0.46	51.9476	56.3	TP
20	Bench	90	45	1	3	0.359824	0.42	54.0284	55.7	TP
20	Bench	100	50	1	1	0.160261		45.6424		FN
21	Bench	50	25	1	1	0.828315		41.687		Error
21	Bench	50	25	1	2	0.866019		41.4657		Error
21	Bench	50	25	1	3	0.863828		43.4189		Error
21	Bench	50	25	1	4	0.799532		42.3176		Error
21	Bench	50	25	1	5	0.786329		44.0141		Error
21	Bench	70	37	1	1	0.601506		42.0942		Error
21	Bench	70	37	1	2	0.584198		42.8498		Error
21	Bench	70	37	1	3	0.540996		41.3828		Error
21	Bench	70	37	1	4	0.505362		44.1592		Error
21	Bench	70	37	1	5	0.413165		39.641		Error
21	Bench	90	47	1	1	0.248722		41.5544		Error
21	Bench	90	47	1	2	0.189335		39.0221		Error
21	Bench	90	47	1	3	0.102674		24.2238		Error
21	Bench	100	50	1	1	0.276528		38.0073		Error
22	Bench	50	35	1	1	0.891843	0.88	40.7067	38.7	TP
22	Bench	50	35	1	2	0.892766	0.84	41.9172	38.4	TP
22	Bench	50	35	1	3	0.854756	0.84	43.0413	41.3	TP
22	Bench	50	35	1	4	0.850491	0.8	42.9484	39.1	TP
22	Bench	50	35	1	5	0.852921	0.87	44.3227	43.8	TP
22	Bench	70	50	1	1	0.687207	0.65	38.2964	35.4	TP
22	Bench	70	50	1	2	0.682856	0.71	40.9611	40.7	TP
22	Bench	70	50	1	3	0.61005	0.6	38.7336	37.2	TP
22	Bench	70	50	1	4	0.574714	0.56	37.9567	35.9	TP
22	Bench	70	50	1	5	0.580202	0.53	39.0677	37.3	TP
22	Bench	90	63	1	1	0.442394	0.38	36.0447	32	TP
22	Bench	90	63	1	2	0.423548	0.36	35.9387	32.1	TP
22	Bench	90	63	1	3	0.38265	0.33	34.4722	30.4	TP
22	Bench	100	70	1	1	0.357348	0.32	35.9294	32.7	TP
23	Bench	50	35	1	1		0.15		23.3	FP
23	Bench	50	35	1	2	0.82781	0.8	41.8107	36.7	TP
23	Bench	50	35	1	3	0.839754	0.86	43.4208	40.1	TP
23	Bench	50	35	1	4	0.860468	0.81	43.0791	38.6	TP
23	Bench	50	35	1	5	0.842499	0.81	43.0972	39.6	TP
23	Bench	50	35	1	6	0.85523	0.84	43.8615	39.3	TP
23	Bench	70	42	1	1	0.660986	0.66	42.2456	41	TP
23	Bench	70	42	1	2	0.667058	0.63	42.8835	41.6	TP
23	Bench	70	42	1	3	0.635851	0.63	43.3126	41.2	TP
23	Bench	70	42	1	4	0.649216	0.63	44.3512	41.4	TP
23	Bench	70	42	1	5	0.60693	0.61	42.7867	40.8	TP
23	Bench	90	55	1	1	0.337594	0.29	45.438	38.1	TP
23	Bench	90	55	1	2	0.280892	0.25	45.2622	40.7	TP
23	Bench	90	55	1	3	0.119281	0.1	43.0447	38.2	TP
23	Bench	100	60	1	1	0.0736607		17.5135		FN
24	Bench	50	30	1	1	0.828233	0.89	49.0231	49.6	TP
24	Bench	50	30	1	2	0.827941	0.85	48.6656	49.8	TP
24	Bench	50	30	1	3	0.858371	0.9	48.6465	48.8	TP
24	Bench	50	30	1	4	0.843142	0.86	49.6564	49.2	TP
24	Bench	50	30	1	5	0.784827	0.79	48.2593	49.1	TP
24	Bench	70	42	1	1	0.540031	0.59	45.8962	47.9	TP
24	Bench	70	42	1	2	0.542624	0.57	45.7236	46.6	TP
24	Bench	70	42	1	3	0.506986	0.53	45.4681	47.3	TP
24	Bench	70	42	1	4	0.431372	0.44	45.6267	47.1	TP
24	Bench	70	42	1	5	0.419949	0.4	44.7211	44.8	TP
24	Bench	90	53	1	1	0.356864	0.34	45.0699	44.8	TP
24	Bench	90	53	1	2	0.319409	0.31	45.9796	46	TP
24	Bench	90	53	1	3	0.349408	0.34	44.9932	46.3	TP
24	Bench	100	60	1	1	0.208014	0.18	45.5363	42.3	TP
1	Bench	50	17	2	1	0.846758	1	41.6237	38.6	TP
1	Bench	50	17	2	2	0.851376	1.03	42.7115	38.3	TP
1	Bench	50	17	2	3	0.924967	1.07	44.3793	46.5	TP
1	Bench	50	17	2	4	0.940691	1.2	44.5946	45.3	TP
1	Bench	50	17	2	5	0.77134	1	43.4422	39.4	TP
1	Bench	70	23	2	1		0.41		21.5	FP
1	Bench	70	23	2	2	0.539444	0.69	39.8609	36.8	TP
1	Bench	70	23	2	3	0.53499	0.6	40.6532	37	TP
1	Bench	70	23	2	4	0.552992	0.74	41.9973	43.1	TP
1	Bench	70	23	2	5	0.541417	0.68	42.8056	38.3	TP
1	Bench	70	23	2	6	0.516183	0.7	41.8755	43.1	TP
1	Bench	90	30	2	1	0.311992	0.59	39.4202	34.2	TP
1	Bench	90	30	2	2	0.320175	0.35	42.5304	39.8	TP
1	Bench	90	30	2	3	0.312305	0.38	42.1801	36.2	TP
1	Bench	100	33	2	1		0.45		26.1	FP
1	Bench	100	33	2	2	0.293631	0.37	41.3133	36.1	TP
2	Bench	50	20	2	1		0.45		27.5	FP
2	Bench	50	20	2	2	0.891312	1.16	50.8823	52	TP
2	Bench	50	20	2	3	0.949777	1.2	51.242	51.8	TP
2	Bench	50	20	2	4	0.88329	1.13	49.9381	50.6	TP
2	Bench	50	20	2	5	0.871385	1.06	51.9498	52.7	TP
2	Bench	50	20	2	6	0.849636	1.02	47.9704	45.5	TP
2	Bench	70	27	2	1		0.36		27.3	FP
2	Bench	70	27	2	2	0.691025	0.84	49.8768	49.4	TP
2	Bench	70	27	2	3	0.75766	0.9	50.9267	49.9	TP
2	Bench	70	27	2	4	0.665501	0.75	51.324	48.2	TP
2	Bench	70	27	2	5	0.620963	0.75	49.1959	45.5	TP
2	Bench	70	27	2	6	0.533274	0.67	48.7639	49.3	TP
2	Bench	90	35	2	1		0.26		23.6	FP
2	Bench	90	35	2	2	0.516184	0.67	46.8902	47.2	TP
2	Bench	90	35	2	3	0.418045	0.45	48.6893	46.8	TP
2	Bench	90	35	2	4	0.422342	0.53	50.6757	49.6	TP
2	Bench	100	38	2	1		0.32		22.7	FP
2	Bench	100	38	2	2	0.275664	0.31	48.3439	47.3	TP
3	Bench	50	15	2	1	0.583081	0.7	33.2906	31.3	TP
3	Bench	50	15	2	2	0.727048	0.98	38.5296	39.1	TP
3	Bench	50	15	2	3	0.717768	1.1	39.7825	41.8	TP
3	Bench	50	15	2	4	0.678181	1.03	38.9842	42.7	TP
3	Bench	50	15	2	5	0.742934	0.92	40.8605	44.2	TP
3	Bench	70	22	2	1	0.521758	0.73	35.3834	38.1	TP
3	Bench	70	22	2	2	0.486043	0.7	37.7104	40.3	TP
3	Bench	70	22	2	3	0.481299	0.67	35.8726	39.3	TP
3	Bench	70	22	2	4	0.44281	0.59	35.9652	37.5	TP
3	Bench	70	22	2	5	0.475525	0.7	39.1731	43.2	TP
3	Bench	90	27	2	1	0.379548	0.43	30.5402	29	TP
3	Bench	90	27	2	2	0.366278	0.49	31.8103	30.8	TP
3	Bench	90	27	2	3	0.295662	0.38	32.3778	32.5	TP
3	Bench	100	30	2	1	0.274595	0.43	29.5944	30.4	TP
4	Bench	50	28	2	1	0.470257	0.7	28.1895	28.9	TP
4	Bench	50	28	2	2	0.494397	0.63	29.1183	29.9	TP
4	Bench	50	28	2	3	0.586657	0.72	31.2669	31.7	TP
4	Bench	50	28	2	4	0.592339	0.71	32.1235	32	TP
4	Bench	50	28	2	5	0.602623	0.78	33.4646	36.3	TP
4	Bench	90	50	2	1	0.371848	0.47	30.5423	31.6	TP
4	Bench	90	50	2	2	0.394585	0.53	29.9109	29.9	TP
4	Bench	90	50	2	3	0.39477	0.57	30.1529	32.3	TP
4	Bench	100	55	2	1	0.295313	0.4	29.1722	28.7	TP
5	Bench	50	55	2	1	0.863208	1.08	42.7249	45.1	TP
5	Bench	50	55	2	2	0.855675	1.05	42.7669	41.5	TP
5	Bench	50	55	2	3	0.866697	0.97	42.7419	43.2	TP
5	Bench	50	55	2	4	0.857066	1.04	42.8325	44.7	TP
5	Bench	50	55	2	5	0.900842	1.05	45.4444	45.2	TP
5	Bench	70	77	2	1	0.580877	0.74	38.9187	40.1	TP
5	Bench	70	77	2	2	0.562827	0.67	38.5094	37.9	TP
5	Bench	70	77	2	3	0.528485	0.63	38.2997	38.6	TP
5	Bench	70	77	2	4	0.525164	0.64	38.9154	40.5	TP
5	Bench	70	77	2	5	0.485255	0.56	40.2245	40.7	TP
5	Bench	90	100	2	1	0.320901	0.36	39.9503	40	TP
5	Bench	90	100	2	2	0.226975	0.26	39.4656	39.2	TP
5	Bench	90	100	2	3	0.258762	0.29	41.0646	40.1	TP
5	Bench	100	105	2	1	0.261707	0.31	40.6916	42.4	TP
6	Bench	50	25	2	1	0.761336	0.98	40.342	43.5	TP
6	Bench	50	25	2	2	0.769886	0.88	41.5687	43.3	TP
6	Bench	50	25	2	3	0.7594	0.92	42.8667	42.3	TP
6	Bench	50	25	2	4	0.772264	0.92	43.4917	44.5	TP
6	Bench	50	25	2	5	0.762396	0.87	42.2967	44.9	TP
6	Bench	70	35	2	1	0.622192	0.71	40.3276	39.2	TP
6	Bench	70	35	2	2	0.598757	0.67	41.9967	38.7	TP
6	Bench	70	35	2	3	0.546514	0.66	41.8512	41	TP
6	Bench	70	35	2	4	0.53037	0.6	42.2685	41.7	TP
6	Bench	70	35	2	5	0.51668	0.65	41.7655	43.8	TP
6	Bench	90	45	2	1	0.365164	0.5	39.8487	41.8	TP
6	Bench	90	45	2	2	0.302428	0.42	39.812	40.5	TP
6	Bench	90	45	2	3	0.235602	0.33	38.7794	36.8	TP
6	Bench	100	50	2	1	0.149984	0.32	34.2821	29.6	TP
7	Bench	50	35	2	1	0.803311	0.85	44.1222	43.2	TP
7	Bench	50	35	2	2	0.902683	0.86	49.6394	44	TP
7	Bench	50	35	2	3	0.887691	0.95	48.6427	46.4	TP
7	Bench	50	35	2	4	0.861603	0.9	50.2072	46.7	TP
7	Bench	50	35	2	5	0.787348	0.89	47.0039	45.9	TP
7	Bench	70	50	2	1	0.589802	0.64	43.1499	40.7	TP
7	Bench	70	50	2	2	0.586964	0.67	42.487	40	TP
7	Bench	70	50	2	3	0.460512	0.48	40.2323	35.4	TP
7	Bench	70	50	2	4	0.549498	0.58	39.6676	36.7	TP
7	Bench	70	50	2	5	0.539412	0.6	37.9896	34.7	TP
7	Bench	90	63	2	1		0.42		20	FP
7	Bench	90	63	2	2	0.421146	0.53	37.1953	33.7	TP
7	Bench	90	63	2	3	0.372532	0.43	35.4158	33.8	TP
7	Bench	90	63	2	4	0.360562	0.42	33.3627	32.4	TP
7	Bench	100	70	2	1		0.26		20.2	FP
7	Bench	100	70	2	2	0.326844	0.4	33.8777	30.7	TP
8	Bench	50	22	2	1	0.706516	0.9	45.2108	47.5	TP
8	Bench	50	22	2	2	0.705056	0.95	46.6315	49.2	TP
8	Bench	50	22	2	3	0.654232	0.81	46.684	46	TP
8	Bench	50	22	2	4	0.65509	0.78	45.1804	43.2	TP
8	Bench	50	22	2	5	0.650731	0.79	47.4813	50.5	TP
8	Bench	70	32	2	1		0.38		23.4	FP
8	Bench	70	32	2	2	0.543265	0.67	44.5498	43.7	TP
8	Bench	70	32	2	3	0.586037	0.65	47.2373	43.5	TP
8	Bench	70	32	2	4	0.55432	0.68	46.7164	47.8	TP
8	Bench	70	32	2	5	0.540534	0.55	46.6103	40.4	TP
8	Bench	70	32	2	6	0.522016	0.54	46.1725	44.4	TP
8	Bench	90	40	2	1	0.336986	0.43	42.4264	40.1	TP
8	Bench	90	40	2	2	0.311149	0.43	42.6334	41.2	TP
8	Bench	90	40	2	3	0.295173	0.37	42.5947	44	TP
8	Bench	100	45	2	1		0.23		14.7	FP
8	Bench	100	45	2	2	0.208516	0.29	41.2445	41.4	TP
9	Bench	50	40	2	1		0.3		21.3	FP
9	Bench	50	40	2	2	0.740041	0.83	40.6918	40.4	TP
9	Bench	50	40	2	3	0.768864	0.8	40.3938	38.5	TP
9	Bench	50	40	2	4	0.64873	0.65	39.2439	34.9	TP
9	Bench	50	40	2	5	0.71465	0.79	39.173	38.8	TP
9	Bench	50	40	2	6	0.737138	0.75	40.4284	36.7	TP
9	Bench	70	55	2	1	0.573915	0.64	38.5155	35.3	TP
9	Bench	70	55	2	2	0.531934	0.59	37.8639	33	TP
9	Bench	70	55	2	3	0.513424	0.58	39.3776	33.9	TP
9	Bench	70	55	2	4	0.50546	0.55	39.6031	34.8	TP
9	Bench	70	55	2	5	0.454059	0.51	39.1821	33.5	TP
9	Bench	90	72	2	1	0.321995	0.38	36.6042	35.7	TP
9	Bench	90	72	2	2	0.303913	0.32	36.0676	33.7	TP
9	Bench	90	72	2	3	0.17283	0.27	35.328	34.4	TP
9	Bench	100	80	2	1	0.178602	0.18	33.8313	31.7	TP
10	Bench	50	18	2	1		0.6		21.7	FP
10	Bench	50	18	2	2	0.921042	1.06	50.2821	51.9	TP
10	Bench	50	18	2	3	0.938507	1.08	48.9831	49.6	TP
10	Bench	50	18	2	4	0.886881	0.98	49.495	46.5	TP
10	Bench	50	18	2	5	0.967169	1.02	52.4512	51.7	TP
10	Bench	50	18	2	6	1.01232	1.11	56.6605	54.7	TP
10	Bench	70	25	2	1	0.595295	0.59	44.785	40.7	TP
10	Bench	70	25	2	2	0.614047	0.73	47.1966	48.6	TP
10	Bench	70	25	2	3	0.596006	0.66	46.6682	44.9	TP
10	Bench	70	25	2	4	0.546858	0.65	45.4511	42.3	TP
10	Bench	70	25	2	5	0.481476	0.63	45.1994	44.3	TP
10	Bench	90	32	2	1	0.269473	0.3	39.5381	40.3	TP
10	Bench	90	32	2	2	0.272843	0.28	40.4351	36.1	TP
10	Bench	90	32	2	3	0.259008	0.27	41.6938	37.1	TP
10	Bench	100	35	2	1	0.184449	0.32		17.8	TP
10	Bench	100	35	2	2		0.28	35.2807	36.1	FP
11	Bench	50	45	2	1	0.870152	1.08	43.6473	47.6	TP
11	Bench	50	45	2	2	0.870359	1.09	43.6231	46.1	TP
11	Bench	50	45	2	3	0.857097	1.06	43.0011	46.3	TP
11	Bench	50	45	2	4	0.83998	1.07	44.1504	49.3	TP
11	Bench	50	45	2	5	0.834473	1.12	45.2258	50.7	TP
11	Bench	70	63	2	1	0.669855	0.76	42.8597	45.9	TP
11	Bench	70	63	2	2	0.670587	0.74	44.213	46.8	TP
11	Bench	70	63	2	3	0.617779	0.69	43.9877	43.7	TP
11	Bench	70	63	2	4	0.60927	0.67	45.1053	46	TP
11	Bench	70	63	2	5	0.581802	0.64	46.3056	47.3	TP
11	Bench	90	80	2	1	0.461289	0.52	43.0579	45.3	TP
11	Bench	90	80	2	2	0.387105	0.45	43.3971	44.9	TP
11	Bench	90	80	2	3	0.343789	0.44	42.9994	44.8	TP
11	Bench	100	90	2	1	0.279796	0.3	42.1308	40.5	TP
12	Bench	50	48	2	1	0.702196	0.9	40.0035	40.2	TP
12	Bench	50	48	2	2	0.72168	0.79	41.4828	40.2	TP
12	Bench	50	48	2	3	0.72345	0.86	42.3053	43.1	TP
12	Bench	50	48	2	4	0.71729	0.81	41.218	41.7	TP
12	Bench	50	48	2	5	0.720473	0.81	42.496	42.3	TP
12	Bench	70	67	2	1	0.5501	0.61	38.1998	37.7	TP
12	Bench	70	67	2	2	0.488612	0.61	39.0551	40	TP
12	Bench	70	67	2	3	0.472393	0.55	39.8902	42.5	TP
12	Bench	70	67	2	4	0.478255	0.58	40.3714	42.1	TP
12	Bench	70	67	2	5	0.489652	0.59	40.4605	42.1	TP
12	Bench	90	85	2	2	0.262353	0.32	37.5142	36.6	TP
12	Bench	90	85	2	3	0.257787	0.29	37.2602	36.1	TP
12	Bench	100	95	2	1	0.183787	0.2	35.6134	35.1	TP
13	Bench	50	45	2	1	1.09345	1.1	50.766	46.4	TP
13	Bench	50	45	2	2	1.16332	1.18	51.3223	47.6	TP
13	Bench	50	45	2	3	1.19897	1.21	53.1648	50.3	TP
13	Bench	50	45	2	4	1.17085	1.2	51.5931	49.8	TP
13	Bench	50	45	2	5	1.1611	1.15	50.1737	46.8	TP
13	Bench	70	63	2	1	0.903044	0.96	50.7924	48.6	TP
13	Bench	70	63	2	2	0.915528	0.96	53.47	52.3	TP
13	Bench	70	63	2	3	0.876068	0.9	53.3822	50	TP
13	Bench	70	63	2	4	0.859741	0.94	53.6543	52.4	TP
13	Bench	70	63	2	5	0.823566	0.91	53.0266	53.1	TP
13	Bench	90	80	2	1	0.632954	0.67	49.2128	48	TP
13	Bench	90	80	2	2	0.53067	0.58	50.6729	50.5	TP
13	Bench	90	80	2	3	0.551655	0.57	50.3447	49.7	TP
13	Bench	100	90	2	1	0.495517	0.48	50.0939	44.4	TP
14	Bench	50	40	2	1	1.0054	1.05	49.761	47	TP
14	Bench	50	40	2	2	0.993876	1	51.8498	48.2	TP
14	Bench	50	40	2	3	0.908586	0.97	48.9136	47	TP
14	Bench	50	40	2	4	0.941374	1.01	50.0607	49	TP
14	Bench	50	40	2	5	0.891178	0.97	49.1751	47.8	TP
14	Bench	70	57	2	1	0.753834	0.81	48.4897	47.2	TP
14	Bench	70	57	2	2	0.770572	0.79	49.978	46.6	TP
14	Bench	70	57	2	3	0.726702	0.74	50.1204	46.4	TP
14	Bench	70	57	2	4	0.697912	0.71	49.1989	46.9	TP
14	Bench	70	57	2	5	0.742941	0.75	48.421	43.5	TP
14	Bench	90	72	2	1	0.571013	0.57	48.9358	45.9	TP
14	Bench	90	72	2	2	0.541305	0.51	49.4212	43.2	TP
14	Bench	90	72	2	3	0.470361	0.48	47.6334	44.5	TP
14	Bench	100	80	2	1	0.464337	0.48	47.6682	43.3	TP
15	Bench	50	53	2	1	1.00557	1.13	49.7759	48	TP
15	Bench	50	53	2	2	1.0046	1.08	51.7419	51.3	TP
15	Bench	50	53	2	3	0.961967	1.05	53.4268	51.4	TP
15	Bench	50	53	2	4	0.984848	1.07	52.6268	49.9	TP
15	Bench	50	53	2	5	0.949256	1.12	51.2404	48.6	TP
15	Bench	70	73	2	1	0.724906	0.76	48.995	46.6	TP
15	Bench	70	73	2	2	0.702424	0.75	47.9965	46.6	TP
15	Bench	70	73	2	3	0.703809	0.75	49.3689	47.5	TP
15	Bench	70	73	2	4	0.679808	0.7	48.6714	44.1	TP
15	Bench	70	73	2	5	0.586857	0.64	50.2295	47.9	TP
15	Bench	90	95	2	2	0.265524	0.29	46.4291	42.1	TP
15	Bench	90	95	2	3	0.230569	0.28	46.4189	41.6	TP
15	Bench	100	105	2	1	0.11978	0.19	47.0602	42.8	TP
16	Bench	50	18	2	1		0.54		21.9	FP
16	Bench	50	18	2	2	0.488254	0.67	37.8889	37	TP
16	Bench	50	18	2	3	0.619493	0.87	35.3058	35.4	TP
16	Bench	50	18	2	4	0.733579	0.98	39.1622	42.6	TP
16	Bench	50	18	2	5	0.771825	0.99	39.7406	37.6	TP
16	Bench	50	18	2	6	0.771233	1.01	39.2912	39.6	TP
16	Bench	70	25	2	1		0.55		21.2	FP
16	Bench	70	25	2	2	0.50094	0.61	35.9885	33.5	TP
16	Bench	70	25	2	3	0.508021	0.64	36.7514	35.6	TP
16	Bench	70	25	2	4	0.507637	0.6	38.3944	37.5	TP
16	Bench	70	25	2	5	0.458363	0.51	37.5374	35.2	TP
16	Bench	70	25	2	6	0.464857	0.6	37.0161	37.7	TP
16	Bench	90	33	2	1		0.45		22	FP
16	Bench	90	33	2	2	0.346012	0.4	32.536	27.4	TP
16	Bench	90	33	2	3	0.324435	0.46	35.8261	35.1	TP
16	Bench	90	33	2	4	0.291397	0.53	32.8046	31.3	TP
16	Bench	100	37	2	1		0.17		16.5	FP
16	Bench	100	37	2	2	0.197358	0.2	31.5951	27.9	TP
17	Bench	50	80	2	1	0.815227	0.94	35.2917	36.5	TP
17	Bench	50	80	2	2	0.870964	1	36.7259	38.2	TP
17	Bench	50	80	2	3	0.846257	0.95	36.5415	38	TP
17	Bench	50	80	2	4	0.843209	0.92	37.3856	39.9	TP
17	Bench	50	80	2	5	0.854185	0.97	37.8791	41.3	TP
17	Bench	70	112	2	1	0.539007	0.66	28.5107	29.9	TP
17	Bench	70	112	2	2	0.490275	0.55	32.8329	31.4	TP
17	Bench	70	112	2	3	0.542317	0.63	28.9444	27.1	TP
17	Bench	70	112	2	4	0.541148	0.59	29.6874	30.7	TP
17	Bench	70	112	2	5	0.527213	0.61	35.5098	36.9	TP
17	Bench	90	145	2	1	0.309876	0.33	26.5853	25	TP
17	Bench	90	145	2	2	0.275242	0.32	27.6296	26.4	TP
17	Bench	90	145	2	3	0.168754		33.6091		FN
17	Bench	100	160	2	1	0.185855	0.26	33.3922	34.5	TP
18	Bench	50	11	2	1	0.931191	1.04	46.8622	45.9	TP
18	Bench	50	11	2	2	0.845644	1.05	46.5077	51.7	TP
18	Bench	50	11	2	3	0.88323	1.18	45.8924	46.1	TP
18	Bench	50	11	2	4	0.863059	1.04	47.4399	45.1	TP
18	Bench	50	11	2	5	0.876469	1.09	47.7417	48.9	TP
18	Bench	70	18	2	1	0.60388	0.84	44.2176	40.8	TP
18	Bench	70	18	2	2	0.637252	0.89	45.8277	42.4	TP
18	Bench	70	18	2	3	0.545161	0.71	44.865	42.2	TP
18	Bench	70	18	2	4	0.557738	0.68	46.2775	41.6	TP
18	Bench	70	18	2	5	0.543127	0.68	44.1262	40.9	TP
18	Bench	90	22	2	1	0.391429	0.37	42.7578	43.8	TP
18	Bench	90	22	2	2	0.333185	0.36	41.6866	39.6	TP
18	Bench	90	22	2	3	0.301612	0.29	40.8735	37	TP
18	Bench	100	25	2	1	0.269412	0.27	42.0387	36.1	TP
19	Bench	50	11	2	1	1.04037	1.31	43.0202	45.1	TP
19	Bench	50	11	2	2	0.868841	1	43.8667	45.7	TP
19	Bench	50	11	2	3	0.914611	1.16	46.1422	46.6	TP
19	Bench	50	11	2	4	0.813842	1.04	45.1436	48	TP
19	Bench	50	11	2	5	0.920857	1.18	45.5785	44.4	TP
19	Bench	50	11	2	6	0.908872	1.18	46.6365	52.8	TP
19	Bench	70	18	2	1	0.680243	0.8	40.765	37.5	TP
19	Bench	70	18	2	2	0.597371	0.82	43.8582	36.9	TP
19	Bench	70	18	2	3	0.592088	0.94	44.8293	42.7	TP
19	Bench	70	18	2	4	0.672536	1	44.6101	40.7	TP
19	Bench	70	18	2	5	0.439248	0.58	43.9234	41.9	TP
19	Bench	90	22	2	1	0.378246	0.51	42.7374	44.1	TP
19	Bench	90	22	2	2	0.351354	0.41	43.4743	42.6	TP
19	Bench	90	22	2	3	0.401192	0.52	45.7353	46.3	TP
19	Bench	100	25	2	1	0.303965	0.36	46.1604	45	TP
20	Bench	50	25	2	1	0.990958	1.08	53.499	53.4	TP
20	Bench	50	25	2	2	1.02469	1.27	56.2057	54.5	TP
20	Bench	50	25	2	3	1.04318	1.28	56.9644	57.1	TP
20	Bench	50	25	2	4	1.01529	1.23	57.0927	57.8	TP
20	Bench	50	25	2	5	1.03846	1.27	58.9557	58.8	TP
20	Bench	70	35	2	1	0.793317	0.92	54.6081	56.8	TP
20	Bench	70	35	2	2	0.745678	0.84	54.4808	53.2	TP
20	Bench	70	35	2	3	0.686049	0.86	50.9164	51	TP
20	Bench	70	35	2	4	0.735395	0.88	53.9888	53.1	TP
20	Bench	70	35	2	5	0.697487	0.85	54.4447	53.7	TP
20	Bench	90	45	2	1	0.403428	0.57	51.9569	53	TP
20	Bench	90	45	2	2	0.378081	0.46	51.9476	57	TP
20	Bench	90	45	2	3	0.359824	0.43	54.0284	56.2	TP
20	Bench	100	50	2	1	0.160261		45.6424		FN
21	Bench	50	25	2	1		0.37		22.8	FP
21	Bench	50	25	2	2	0.828315	0.94	41.687	39.9	TP
21	Bench	50	25	2	3	0.866019	0.87	41.4657	39.6	TP
21	Bench	50	25	2	4	0.863828	0.91	43.4189	42.8	TP
21	Bench	50	25	2	5	0.799532	0.85	42.3176	41.7	TP
22	Bench	50	25	2	6	0.786329	0.8	44.0141	43.7	TP
21	Bench	70	37	2	1		0.3		20.8	FP
21	Bench	70	37	2	2	0.601506	0.69	42.0942	44.2	TP
21	Bench	70	37	2	3	0.584198	0.63	42.8498	41.4	TP
21	Bench	70	37	2	4	0.540996	0.55	41.3828	41.3	TP
21	Bench	70	37	2	5	0.505362	0.56	44.1592	45.5	TP
21	Bench	70	37	2	6	0.413165	0.49	39.641	41.6	TP
21	Bench	90	47	2	1	0.248722	0.26	41.5544	42.2	TP
21	Bench	90	47	2	2	0.189335	0.2	39.0221	38.9	TP
21	Bench	90	47	2	3	0.102674		24.2238		FN
21	Bench	100	50	2	1	0.276528	0.29	38.0073	38	TP
22	Bench	50	35	2	1	0.891843	0.88	40.7067	38.6	TP
22	Bench	50	35	2	2	0.892766	0.88	41.9172	38.5	TP
22	Bench	50	35	2	3	0.854756	0.88	43.0413	41.2	TP
22	Bench	50	35	2	4	0.850491	0.78	42.9484	39.5	TP
22	Bench	50	35	2	5	0.852921	0.88	44.3227	43.5	TP
22	Bench	70	50	2	1	0.687207	0.63	38.2964	35.4	TP
22	Bench	70	50	2	2	0.682856	0.69	40.9611	40.6	TP
22	Bench	70	50	2	3	0.61005	0.64	38.7336	37.5	TP
22	Bench	70	50	2	4	0.574714	0.57	37.9567	36.4	TP
22	Bench	70	50	2	5	0.580202	0.53	39.0677	37.5	TP
22	Bench	90	63	2	1	0.442394	0.39	36.0447	32.1	TP
22	Bench	90	63	2	2	0.423548	0.37	35.9387	32.3	TP
22	Bench	90	63	2	3	0.38265	0.32	34.4722	30.2	TP
22	Bench	100	70	2	1	0.357348	0.35	35.9294	33	TP
23	Bench	50	35	2	1	0.82781	0.81	41.8107	37.3	TP
23	Bench	50	35	2	2	0.839754	0.86	43.4208	40.7	TP
23	Bench	50	35	2	3	0.860468	0.82	43.0791	38.7	TP
23	Bench	50	35	2	4	0.842499	0.79	43.0972	40	TP
23	Bench	50	35	2	5	0.85523	0.82	43.8615	40.1	TP
23	Bench	70	42	2	1	0.660986	0.65	42.2456	40.5	TP
23	Bench	70	42	2	2	0.667058	0.64	42.8835	40	TP
23	Bench	70	42	2	3	0.635851	0.61	43.3126	40.3	TP
23	Bench	70	42	2	4	0.649216	0.64	44.3512	41.4	TP
23	Bench	70	42	2	5	0.60693	0.58	42.7867	39.3	TP
23	Bench	90	55	2	1	0.337594	0.29	45.438	38	TP
23	Bench	90	55	2	2	0.280892	0.25	45.2622	40	TP
23	Bench	90	55	2	3	0.119281	0.09	43.0447	34.5	TP
23	Bench	100	60	2	1	0.0736607		17.5135		FN
24	Bench	50	30	2	1	0.828233	0.86	49.0231	48.8	TP
24	Bench	50	30	2	2	0.827941	0.89	48.6656	49.7	TP
24	Bench	50	30	2	3	0.858371	0.85	48.6465	47.4	TP
24	Bench	50	30	2	4	0.843142	0.85	49.6564	48.7	TP
24	Bench	50	30	2	5	0.784827	0.79	48.2593	49.2	TP
24	Bench	70	42	2	1	0.540031	0.62	45.8962	47.6	TP
24	Bench	70	42	2	2	0.542624	0.58	45.7236	47.5	TP
24	Bench	70	42	2	3	0.506986	0.52	45.4681	47.4	TP
24	Bench	70	42	2	4	0.431372	0.43	45.6267	47.2	TP
24	Bench	70	42	2	5	0.419949	0.4	44.7211	45.2	TP
24	Bench	90	53	2	1	0.356864	0.32	45.0699	43.3	TP
24	Bench	90	53	2	2	0.319409	0.31	45.9796	46.2	TP
24	Bench	90	53	2	3	0.349408	0.33	44.9932	45.4	TP
24	Bench	100	60	2	1	0.208014		45.5363		FN
1	Bench	50	17	3	1	0.846758	0.94	41.6237	37.6	TP
1	Bench	50	17	3	2	0.851376	1.01	42.7115	38.4	TP
1	Bench	50	17	3	3	0.924967	1.06	44.3793	45	TP
1	Bench	50	17	3	4	0.940691	1.1	44.5946	44.8	TP
1	Bench	50	17	3	5	0.77134	0.95	43.4422	40	TP
1	Bench	70	23	3	1		0.36		21.1	FP
1	Bench	70	23	3	2	0.539444	0.69	39.8609	36.7	TP
1	Bench	70	23	3	3	0.53499	0.61	40.6532	36.7	TP
1	Bench	70	23	3	4	0.552992	0.74	41.9973	43.1	TP
1	Bench	70	23	3	5	0.541417	0.69	42.8056	38	TP
1	Bench	70	23	3	6	0.516183	0.69	41.8755	42.2	TP
1	Bench	90	30	3	1	0.311992	0.5	39.4202	34.2	TP
1	Bench	90	30	3	2	0.320175	0.36	42.5304	39.2	TP
1	Bench	90	30	3	3	0.312305	0.36	42.1801	36.1	TP
1	Bench	100	33	3	1		0.31		24.6	FP
1	Bench	100	33	3	2	0.293631	0.33	41.3133	35.9	TP
2	Bench	50	20	3	1		0.39		26.8	FP
2	Bench	50	20	3	2	0.891312	1.15	50.8823	50.8	TP
2	Bench	50	20	3	3	0.949777	1.18	51.242	51.5	TP
2	Bench	50	20	3	4	0.88329	1.06	49.9381	49.4	TP
2	Bench	50	20	3	5	0.871385	1.01	51.9498	52.1	TP
2	Bench	50	20	3	6	0.849636	1	47.9704	44	TP
2	Bench	70	27	3	1		0.34		26.3	FP
2	Bench	70	27	3	2	0.691025	0.73	49.8768	48.4	TP
2	Bench	70	27	3	3	0.75766	0.85	50.9267	49.9	TP
2	Bench	70	27	3	4	0.665501	0.81	51.324	51.8	TP
2	Bench	70	27	3	5	0.620963	0.67	49.1959	50.3	TP
2	Bench	70	27	3	6	0.533274	0.62	48.7639	50	TP
2	Bench	90	35	3	1		0.25		23	FP
2	Bench	90	35	3	2	0.516184	0.62	46.8902	47.2	TP
2	Bench	90	35	3	3	0.418045	0.45	48.6893	46	TP
2	Bench	90	35	3	4	0.422342	0.51	50.6757	50.3	TP
2	Bench	100	38	3	1		0.31		21.8	FP
2	Bench	100	38	3	2	0.275664	0.34	48.3439	46.6	TP
3	Bench	50	15	3	1	0.583081	0.76	33.2906	30.7	TP
3	Bench	50	15	3	2	0.727048	0.99	38.5296	39	TP
3	Bench	50	15	3	3	0.717768	1	39.7825	42	TP
3	Bench	50	15	3	4	0.678181	0.97	38.9842	42	TP
3	Bench	50	15	3	5	0.742934	0.93	40.8605	43.3	TP
3	Bench	70	22	3	1	0.521758	0.71	35.3834	36.8	TP
3	Bench	70	22	3	2	0.486043	0.68	37.7104	39.8	TP
3	Bench	70	22	3	3	0.481299	0.67	35.8726	38.5	TP
3	Bench	70	22	3	4	0.44281	0.63	35.9652	37.4	TP
3	Bench	70	22	3	5	0.475525	0.66	39.1731	43.9	TP
3	Bench	90	27	3	1	0.379548	0.43	30.5402	28.3	TP
3	Bench	90	27	3	2	0.366278	0.49	31.8103	30.4	TP
3	Bench	90	27	3	3	0.295662	0.35	32.3778	32.8	TP
3	Bench	100	30	3	1	0.274595	0.42	29.5944	29.2	TP
4	Bench	50	28	3	1	0.470257	0.68	28.1895	28.6	TP
4	Bench	50	28	3	2	0.494397	0.76	29.1183	29.2	TP
4	Bench	50	28	3	3	0.586657	0.74	31.2669	31.5	TP
4	Bench	50	28	3	4	0.592339	0.74	32.1235	31.9	TP
4	Bench	50	28	3	5	0.602623	0.78	33.4646	36.5	TP
4	Bench	90	50	3	1	0.371848	0.42	30.5423	30.3	TP
4	Bench	90	50	3	2	0.394585	0.46	29.9109	28.7	TP
4	Bench	90	50	3	3	0.39477	0.45	30.1529	30.6	TP
4	Bench	100	55	3	1	0.295313	0.4	29.1722	27.9	TP
5	Bench	50	55	3	1	0.863208	1	42.7249	44.3	TP
5	Bench	50	55	3	2	0.855675	0.98	42.7669	41.6	TP
5	Bench	50	55	3	3	0.866697	0.97	42.7419	43	TP
5	Bench	50	55	3	4	0.857066	0.98	42.8325	44.1	TP
5	Bench	50	55	3	5	0.900842	0.97	45.4444	44.3	TP
5	Bench	70	77	3	1	0.580877	0.76	38.9187	39.9	TP
5	Bench	70	77	3	2	0.562827	0.7	38.5094	37.5	TP
5	Bench	70	77	3	3	0.528485	0.67	38.2997	38.3	TP
5	Bench	70	77	3	4	0.525164	0.67	38.9154	40	TP
5	Bench	70	77	3	5	0.485255	0.64	40.2245	39.3	TP
5	Bench	90	100	3	1	0.320901	0.36	39.9503	39.3	TP
5	Bench	90	100	3	2	0.226975	0.26	39.4656	39.5	TP
5	Bench	90	100	3	3	0.258762	0.28	41.0646	40.1	TP
5	Bench	100	105	3	1	0.261707	0.31	40.6916	42.6	TP
6	Bench	50	25	3	1	0.761336	0.9	40.342	42.1	TP
6	Bench	50	25	3	2	0.769886	0.95	41.5687	42.4	TP
6	Bench	50	25	3	3	0.7594	0.91	42.8667	41.7	TP
6	Bench	50	25	3	4	0.772264	0.9	43.4917	44.1	TP
6	Bench	50	25	3	5	0.762396	0.88	42.2967	42.8	TP
6	Bench	70	35	3	1	0.622192	0.69	40.3276	39.9	TP
6	Bench	70	35	3	2	0.598757	0.63	41.9967	39.8	TP
6	Bench	70	35	3	3	0.546514	0.6	41.8512	41.1	TP
6	Bench	70	35	3	4	0.53037	0.59	42.2685	41.7	TP
6	Bench	70	35	3	5	0.51668	0.58	41.7655	44.4	TP
6	Bench	90	45	3	1	0.365164	0.4	39.8487	40	TP
6	Bench	90	45	3	2	0.302428	0.32	39.812	40	TP
6	Bench	90	45	3	3	0.235602	0.3	38.7794	35.8	TP
6	Bench	100	50	3	1	0.149984	0.35	34.2821	28.3	TP
7	Bench	50	35	3	1	0.803311	0.81	44.1222	43.5	TP
7	Bench	50	35	3	2	0.902683	0.83	49.6394	42.8	TP
7	Bench	50	35	3	3	0.887691	0.93	48.6427	47.6	TP
7	Bench	50	35	3	4	0.861603	0.92	50.2072	45.4	TP
7	Bench	50	35	3	5	0.787348	0.89	47.0039	45.9	TP
7	Bench	70	50	3	1	0.589802	0.64	43.1499	40.1	TP
7	Bench	70	50	3	2	0.586964	0.66	42.487	40	TP
7	Bench	70	50	3	3	0.460512	0.48	40.2323	35.7	TP
7	Bench	70	50	3	4	0.549498	0.6	39.6676	36.1	TP
7	Bench	70	50	3	5	0.539412	0.59	37.9896	34.9	TP
7	Bench	90	63	3	1		0.33		20.7	FP
7	Bench	90	63	3	2	0.421146	0.48	37.1953	34.7	TP
7	Bench	90	63	3	3	0.372532	0.52	35.4158	34.6	TP
7	Bench	90	63	3	4	0.360562	0.4	33.3627	33.4	TP
7	Bench	100	70	3	1		0.26		19	FP
7	Bench	100	70	3	2	0.326844	0.36	33.8777	31.4	TP
8	Bench	50	22	3	1	0.706516	0.81	45.2108	48.6	TP
8	Bench	50	22	3	2	0.705056	0.93	46.6315	49.4	TP
8	Bench	50	22	3	3	0.654232	0.79	46.684	46.2	TP
8	Bench	50	22	3	4	0.65509	0.84	45.1804	42.7	TP
8	Bench	50	22	3	5	0.650731	0.8	47.4813	49.6	TP
8	Bench	70	32	3	1		0.35		22.8	FP
8	Bench	70	32	3	2	0.543265	0.69	44.5498	43.7	TP
8	Bench	70	32	3	3	0.586037	0.65	47.2373	42.8	TP
8	Bench	70	32	3	4	0.55432	0.73	46.7164	46.5	TP
8	Bench	70	32	3	5	0.540534	0.54	46.6103	40.1	TP
8	Bench	70	32	3	6	0.522016	0.56	46.1725	43.3	TP
8	Bench	90	40	3	1	0.336986	0.44	42.4264	40.6	TP
8	Bench	90	40	3	2	0.311149	0.39	42.6334	42.1	TP
8	Bench	90	40	3	3	0.295173	0.38	42.5947	45.3	TP
8	Bench	100	45	3	1	0.208516	0.28	41.2445	40.9	TP
9	Bench	50	40	3	1	0.740041	0.83	40.6918	39.8	TP
9	Bench	50	40	3	2	0.768864	0.73	40.3938	36.4	TP
9	Bench	50	40	3	3	0.64873	0.65	39.2439	35.9	TP
9	Bench	50	40	3	4	0.71465	0.7	39.173	38.9	TP
9	Bench	50	40	3	5	0.737138	0.72	40.4284	36.6	TP
9	Bench	70	55	3	1	0.573915	0.63	38.5155	35.5	TP
9	Bench	70	55	3	2	0.531934	0.63	37.8639	34.7	TP
9	Bench	70	55	3	3	0.513424	0.58	39.3776	35.1	TP
9	Bench	70	55	3	4	0.50546	0.57	39.6031	35.5	TP
9	Bench	70	55	3	5	0.454059	0.5	39.1821	34.9	TP
9	Bench	90	72	3	1	0.321995	0.38	36.6042	36.8	TP
9	Bench	90	72	3	2	0.303913	0.33	36.0676	32.3	TP
9	Bench	90	72	3	3	0.17283	0.22	35.328	34.8	TP
9	Bench	100	80	3	1	0.178602	0.2	33.8313	32.1	TP
10	Bench	50	18	3	1	0.921042	1.06	50.2821	52.1	TP
10	Bench	50	18	3	2	0.938507	1.11	48.9831	47.4	TP
10	Bench	50	18	3	3	0.886881	0.84	49.495	46.4	TP
10	Bench	50	18	3	4	0.967169	1.17	52.4512	52	TP
10	Bench	50	18	3	5	1.01232	1.08	56.6605	55.1	TP
10	Bench	70	25	3	1	0.595295	0.61	44.785	41.1	TP
10	Bench	70	25	3	2	0.614047	0.73	47.1966	47.3	TP
10	Bench	70	25	3	3	0.596006	0.65	46.6682	44.8	TP
10	Bench	70	25	3	4	0.546858	0.56	45.4511	42.4	TP
10	Bench	70	25	3	5	0.481476	0.52	45.1994	44.6	TP
10	Bench	90	32	3	1	0.269473	0.29	39.5381	40.3	TP
10	Bench	90	32	3	2	0.272843	0.29	40.4351	36.2	TP
10	Bench	90	32	3	3	0.259008	0.26	41.6938	36.7	TP
10	Bench	100	35	3	1	0.184449	0.27	35.2807	36.4	TP
11	Bench	50	45	3	1	0.870152	0.98	43.6473	46.1	TP
11	Bench	50	45	3	2	0.870359	1.05	43.6231	45.6	TP
11	Bench	50	45	3	3	0.857097	0.99	43.0011	44.9	TP
11	Bench	50	45	3	4	0.83998	0.98	44.1504	47.1	TP
11	Bench	50	45	3	5	0.834473	1.02	45.2258	49.7	TP
11	Bench	70	63	3	1	0.669855	0.78	42.8597	45.5	TP
11	Bench	70	63	3	2	0.670587	0.79	44.213	46.5	TP
11	Bench	70	63	3	3	0.617779	0.66	43.9877	43.5	TP
11	Bench	70	63	3	4	0.60927	0.67	45.1053	43.1	TP
11	Bench	70	63	3	5	0.581802	0.67	46.3056	47.9	TP
11	Bench	90	80	3	1	0.461289	0.52	43.0579	45.3	TP
11	Bench	90	80	3	2	0.387105	0.43	43.3971	44.6	TP
11	Bench	90	80	3	3	0.343789	0.4	42.9994	45.2	TP
11	Bench	100	90	3	1	0.279796	0.29	42.1308	40	TP
12	Bench	50	48	3	1	0.702196	0.77	40.0035	40.5	TP
12	Bench	50	48	3	2	0.72168	0.84	41.4828	39.9	TP
12	Bench	50	48	3	3	0.72345	0.89	42.3053	43.1	TP
12	Bench	50	48	3	4	0.71729	0.71	41.218	41.3	TP
12	Bench	50	48	3	5	0.720473	0.82	42.496	42.4	TP
12	Bench	70	67	3	1	0.5501	0.64	38.1998	36.7	TP
12	Bench	70	67	3	2	0.488612	0.61	39.0551	39.9	TP
12	Bench	70	67	3	3	0.472393	0.57	39.8902	42.2	TP
12	Bench	70	67	3	4	0.478255	0.59	40.3714	42.3	TP
12	Bench	70	67	3	5	0.489652	0.58	40.4605	42.3	TP
12	Bench	90	85	3	2	0.262353	0.36	37.5142	37.1	TP
12	Bench	90	85	3	3	0.257787	0.29	37.2602	37	TP
12	Bench	100	95	3	1	0.183787	0.2	35.6134	33.8	TP
13	Bench	50	45	3	1	1.09345	1.15	50.766	47.2	TP
13	Bench	50	45	3	2	1.16332	1.19	51.3223	48	TP
13	Bench	50	45	3	3	1.19897	1.21	53.1648	50.4	TP
13	Bench	50	45	3	4	1.17085	1.21	51.5931	50.2	TP
13	Bench	50	45	3	5	1.1611	1.2	50.1737	47	TP
13	Bench	70	63	3	1	0.903044	0.96	50.7924	49	TP
13	Bench	70	63	3	2	0.915528	0.99	53.47	54.2	TP
13	Bench	70	63	3	3	0.876068	0.98	53.3822	52.4	TP
13	Bench	70	63	3	4	0.859741	0.99	53.6543	53.4	TP
13	Bench	70	63	3	5	0.823566	0.95	53.0266	55.1	TP
13	Bench	90	80	3	1	0.632954	0.72	49.2128	47.5	TP
13	Bench	90	80	3	2	0.53067	0.6	50.6729	52.1	TP
13	Bench	90	80	3	3	0.551655	0.6	50.3447	50.3	TP
13	Bench	100	90	3	1	0.495517	0.49	50.0939	45	TP
14	Bench	50	40	3	1	1.0054	0.99	49.761	46.4	TP
14	Bench	50	40	3	2	0.993876	1	51.8498	47.4	TP
14	Bench	50	40	3	3	0.908586	0.92	48.9136	45.2	TP
14	Bench	50	40	3	4	0.941374	1.01	50.0607	46.9	TP
14	Bench	50	40	3	5	0.891178	0.94	49.1751	47.7	TP
14	Bench	70	57	3	1	0.753834	0.82	48.4897	46.1	TP
14	Bench	70	57	3	2	0.770572	0.77	49.978	44.4	TP
14	Bench	70	57	3	3	0.726702	0.74	50.1204	44.6	TP
14	Bench	70	57	3	4	0.697912	0.71	49.1989	45.3	TP
14	Bench	70	57	3	5	0.742941	0.78	48.421	42.6	TP
14	Bench	90	72	3	1	0.571013	0.58	48.9358	45.5	TP
14	Bench	90	72	3	2	0.541305	0.52	49.4212	43.5	TP
14	Bench	90	72	3	3	0.470361	0.48	47.6334	43.8	TP
14	Bench	100	80	3	1	0.464337	0.47	47.6682	42.7	TP
15	Bench	50	53	3	1	1.00557	1.07	49.7759	48.2	TP
15	Bench	50	53	3	2	1.0046	1.08	51.7419	51.1	TP
15	Bench	50	53	3	3	0.961967	1.01	53.4268	51.2	TP
15	Bench	50	53	3	4	0.984848	1.08	52.6268	50.3	TP
15	Bench	50	53	3	5	0.949256	1.06	51.2404	49.9	TP
15	Bench	70	73	3	1	0.724906		48.995		FN
15	Bench	70	73	3	2	0.702424	0.71	47.9965	47.1	TP
15	Bench	70	73	3	3	0.703809	0.73	49.3689	47.6	TP
15	Bench	70	73	3	4	0.679808	0.7	48.6714	42.5	TP
15	Bench	70	73	3	5	0.586857	0.63	50.2295	48.4	TP
15	Bench	90	95	3	2	0.265524	0.28	46.4291	41	TP
15	Bench	90	95	3	3	0.230569	0.23	46.4189	40.4	TP
15	Bench	100	105	3	1	0.11978	0.18	47.0602	42.7	TP
16	Bench	50	18	3	1		0.56		21.2	FP
16	Bench	50	18	3	2	0.488254	0.7	37.8889	36.8	TP
16	Bench	50	18	3	3	0.619493	0.9	35.3058	34.3	TP
16	Bench	50	18	3	4	0.733579	0.93	39.1622	40.8	TP
16	Bench	50	18	3	5	0.771825	0.91	39.7406	37	TP
16	Bench	50	18	3	6	0.771233	0.95	39.2912	38.8	TP
16	Bench	70	25	3	1		0.53		20.8	FP
16	Bench	70	25	3	2	0.50094	0.64	35.9885	33	TP
16	Bench	70	25	3	3	0.508021	0.68	36.7514	35.8	TP
16	Bench	70	25	3	4	0.507637	0.65	38.3944	37.2	TP
16	Bench	70	25	3	5	0.458363	0.53	37.5374	34.4	TP
16	Bench	70	25	3	6	0.464857	0.61	37.0161	36.7	TP
16	Bench	90	33	3	1		0.36		20.1	FP
16	Bench	90	33	3	2	0.346012	0.38	32.536	26.5	TP
16	Bench	90	33	3	3	0.324435	0.44	35.8261	34.5	TP
16	Bench	90	33	3	4	0.291397	0.36	32.8046	30.5	TP
16	Bench	100	37	3	1		0.16		15.8	FP
16	Bench	100	37	3	2	0.197358	0.2	31.5951	27.8	TP
17	Bench	50	80	3	1	0.815227	0.9	35.2917	37.2	TP
17	Bench	50	80	3	2	0.870964	1.08	36.7259	37.5	TP
17	Bench	50	80	3	3	0.846257	0.94	36.5415	38	TP
17	Bench	50	80	3	4	0.843209	0.97	37.3856	39.7	TP
17	Bench	50	80	3	5	0.854185	0.97	37.8791	41.6	TP
17	Bench	70	112	3	1	0.539007	0.6	28.5107	25.9	TP
17	Bench	70	112	3	2	0.490275	0.55	32.8329	30.7	TP
17	Bench	70	112	3	3	0.542317	0.68	28.9444	30.9	TP
17	Bench	70	112	3	4	0.541148	0.63	29.6874	31.1	TP
17	Bench	70	112	3	5	0.527213	0.58	35.5098	36.5	TP
17	Bench	90	145	3	1	0.309876	0.31	26.5853	24.9	TP
17	Bench	90	145	3	2	0.275242	0.27	27.6296	25	TP
17	Bench	90	145	3	3	0.168754		33.6091		FN
17	Bench	100	160	3	1	0.185855	0.23	33.3922	34.6	TP
18	Bench	50	11	3	1	0.931191	1.06	46.8622	46.1	TP
18	Bench	50	11	3	2	0.845644	0.93	46.5077	49.4	TP
18	Bench	50	11	3	3	0.88323	1.01	45.8924	45.5	TP
18	Bench	50	11	3	4	0.863059	0.93	47.4399	44.3	TP
18	Bench	50	11	3	5	0.876469	0.98	47.7417	48.3	TP
18	Bench	70	18	3	1	0.60388	0.67	44.2176	40.8	TP
18	Bench	70	18	3	2	0.637252	0.78	45.8277	41.5	TP
18	Bench	70	18	3	3	0.545161	0.68	44.865	42	TP
18	Bench	70	18	3	4	0.557738	0.62	46.2775	39.8	TP
18	Bench	70	18	3	5	0.543127	0.71	44.1262	39.3	TP
18	Bench	90	22	3	1	0.391429	0.38	42.7578	43.6	TP
18	Bench	90	22	3	2	0.333185	0.4	41.6866	39.5	TP
18	Bench	90	22	3	3	0.301612	0.3	40.8735	37.3	TP
18	Bench	100	25	3	1	0.269412	0.26	42.0387	35.5	TP
19	Bench	50	11	3	1	1.04037	1.16	43.0202	43.1	TP
19	Bench	50	11	3	2	0.868841	1.03	43.8667	44.4	TP
19	Bench	50	11	3	3	0.914611	1.04	46.1422	45.9	TP
19	Bench	50	11	3	4	0.813842	0.96	45.1436	47.4	TP
19	Bench	50	11	3	5	0.920857	1.04	45.5785	44.4	TP
19	Bench	50	11	3	6	0.908872	1.1	46.6365	52.5	TP
19	Bench	70	18	3	1	0.680243	0.69	40.765	37.4	TP
19	Bench	70	18	3	2	0.597371	0.62	43.8582	36.1	TP
19	Bench	70	18	3	3	0.592088	0.69	44.8293	41.1	TP
19	Bench	70	18	3	4	0.672536	0.67	44.6101	40.5	TP
19	Bench	70	18	3	5	0.439248	0.5	43.9234	41.7	TP
19	Bench	90	22	3	1	0.378246	0.55	42.7374	43.3	TP
19	Bench	90	22	3	2	0.351354	0.44	43.4743	41.3	TP
19	Bench	90	22	3	3	0.401192	0.53	45.7353	44.8	TP
19	Bench	100	25	3	1	0.303965	0.3	46.1604	45.1	TP
20	Bench	50	25	3	1	0.990958	1.1	53.499	53.8	TP
20	Bench	50	25	3	2	1.02469	1.15	56.2057	55.4	TP
20	Bench	50	25	3	3	1.04318	1.21	56.9644	57.7	TP
20	Bench	50	25	3	4	1.01529	1.18	57.0927	58.6	TP
20	Bench	50	25	3	5	1.03846	1.17	58.9557	58.8	TP
20	Bench	70	35	3	1	0.793317	0.93	54.6081	55.8	TP
20	Bench	70	35	3	2	0.745678	0.83	54.4808	51.9	TP
20	Bench	70	35	3	3	0.686049	0.81	50.9164	50.4	TP
20	Bench	70	35	3	4	0.735395	0.9	53.9888	54	TP
20	Bench	70	35	3	5	0.697487	0.82	54.4447	54.7	TP
20	Bench	90	45	3	1	0.403428	0.43	51.9569	52.9	TP
20	Bench	90	45	3	2	0.378081	0.46	51.9476	55.2	TP
20	Bench	90	45	3	3	0.359824	0.4	54.0284	52.9	TP
20	Bench	100	50	3	1	0.160261	0.27	45.6424	45.9	TP
21	Bench	50	25	3	1	0.828315	0.88	41.687	39.7	TP
21	Bench	50	25	3	2	0.866019	0.85	41.4657	39.8	TP
21	Bench	50	25	3	3	0.863828	0.92	43.4189	43.3	TP
21	Bench	50	25	3	4	0.799532	0.83	42.3176	42.1	TP
21	Bench	50	25	3	5	0.786329	0.81	44.0141	43.9	TP
21	Bench	70	37	3	1	0.601506	0.67	42.0942	44.3	TP
21	Bench	70	37	3	2	0.584198	0.63	42.8498	41.8	TP
21	Bench	70	37	3	3	0.540996	0.6	41.3828	41.1	TP
21	Bench	70	37	3	4	0.505362	0.59	44.1592	46.1	TP
21	Bench	70	37	3	5	0.413165	0.51	39.641	41.3	TP
21	Bench	90	47	3	1	0.248722	0.26	41.5544	42.7	TP
21	Bench	90	47	3	2	0.189335	0.2	39.0221	38.8	TP
21	Bench	90	47	3	3	0.102674		24.2238		FN
21	Bench	100	50	3	1	0.276528	0.29	38.0073	38.2	TP
22	Bench	50	35	3	1	0.891843	0.85	40.7067	39.9	TP
22	Bench	50	35	3	2	0.892766	0.92	41.9172	39	TP
22	Bench	50	35	3	3	0.854756	0.83	43.0413	41.8	TP
22	Bench	50	35	3	4	0.850491	0.85	42.9484	40.1	TP
22	Bench	50	35	3	5	0.852921	0.85	44.3227	44.3	TP
22	Bench	70	50	3	1	0.687207	0.65	38.2964	36.4	TP
22	Bench	70	50	3	2	0.682856	0.72	40.9611	41.1	TP
22	Bench	70	50	3	3	0.61005	0.6	38.7336	37.5	TP
22	Bench	70	50	3	4	0.574714	0.57	37.9567	37.1	TP
22	Bench	70	50	3	5	0.580202	0.54	39.0677	38.3	TP
22	Bench	90	63	3	1		0.16		19.1	FP
22	Bench	90	63	3	2	0.442394	0.38	36.0447	31.2	TP
22	Bench	90	63	3	3	0.423548	0.36	35.9387	32	TP
22	Bench	90	63	3	4	0.38265	0.32	34.4722	29.9	TP
22	Bench	100	70	3	1	0.357348	0.35	35.9294	32.9	TP
23	Bench	50	35	3	1	0.82781	0.75	41.8107	36.5	TP
23	Bench	50	35	3	2	0.839754	0.79	43.4208	40	TP
23	Bench	50	35	3	3	0.860468	0.81	43.0791	38.5	TP
23	Bench	50	35	3	4	0.842499	0.76	43.0972	38.5	TP
23	Bench	50	35	3	5	0.85523	0.79	43.8615	38.9	TP
23	Bench	70	42	3	1	0.660986	0.65	42.2456	40.7	TP
23	Bench	70	42	3	2	0.667058	0.68	42.8835	41.9	TP
23	Bench	70	42	3	3	0.635851	0.62	43.3126	43	TP
23	Bench	70	42	3	4	0.649216	0.61	44.3512	41.3	TP
23	Bench	70	42	3	5	0.60693	0.62	42.7867	41.7	TP
23	Bench	90	55	3	1	0.337594	0.29	45.438	37.3	TP
23	Bench	90	55	3	2	0.280892	0.25	45.2622	39.1	TP
23	Bench	90	55	3	3	0.119281		43.0447		FN
23	Bench	100	60	3	1	0.0736607	0.12	17.5135	7.9	TP
24	Bench	50	30	3	1	0.828233	0.85	49.0231	48.8	TP
24	Bench	50	30	3	2	0.827941	0.86	48.6656	48.4	TP
24	Bench	50	30	3	3	0.858371	0.85	48.6465	47	TP
24	Bench	50	30	3	4	0.843142	0.83	49.6564	47.6	TP
24	Bench	50	30	3	5	0.784827	0.81	48.2593	48	TP
24	Bench	70	42	3	1	0.540031	0.63	45.8962	48.7	TP
24	Bench	70	42	3	2	0.542624	0.59	45.7236	47.3	TP
24	Bench	70	42	3	3	0.506986	0.55	45.4681	48.2	TP
24	Bench	70	42	3	4	0.431372	0.46	45.6267	47.5	TP
24	Bench	70	42	3	5	0.419949	0.42	44.7211	45.6	TP
24	Bench	90	53	3	1	0.356864	0.33	45.0699	43.3	TP
24	Bench	90	53	3	2	0.319409	0.31	45.9796	48.2	TP
24	Bench	90	53	3	3	0.349408	0.35	44.9932	47	TP
24	Bench	100	60	3	1	0.208014		45.5363		FN
1	Bench	50	17	4	1	0.846758	0.9	41.6237	38.5	TP
1	Bench	50	17	4	2	0.851376	0.96	42.7115	38.1	TP
1	Bench	50	17	4	3	0.924967	1.13	44.3793	45.4	TP
1	Bench	50	17	4	4	0.940691	1.08	44.5946	45.7	TP
1	Bench	50	17	4	5	0.77134	0.91	43.4422	40.8	TP
1	Bench	70	23	4	1	0.539444	0.67	39.8609	37.9	TP
1	Bench	70	23	4	2	0.53499	0.6	40.6532	36.4	TP
1	Bench	70	23	4	3	0.552992	0.76	41.9973	43.9	TP
1	Bench	70	23	4	4	0.541417	0.67	42.8056	38.3	TP
1	Bench	70	23	4	5	0.516183	0.75	41.8755	43.1	TP
1	Bench	90	30	4	1	0.311992	0.47	39.4202	34.1	TP
1	Bench	90	30	4	2	0.320175	0.35	42.5304	38.5	TP
1	Bench	90	30	4	3	0.312305	0.37	42.1801	36.3	TP
1	Bench	100	33	4	1	0.293631	0.35	41.3133	35.5	TP
2	Bench	50	20	4	1		0.35		26.9	FP
2	Bench	50	20	4	2	0.891312	1.06	50.8823	51.3	TP
2	Bench	50	20	4	3	0.949777	1.15	51.242	51.5	TP
2	Bench	50	20	4	4	0.88329	1.09	49.9381	49.8	TP
2	Bench	50	20	4	5	0.871385	1.09	51.9498	52.2	TP
2	Bench	50	20	4	6	0.849636	1.03	47.9704	44.3	TP
2	Bench	70	27	4	1		0.34		26.6	FP
2	Bench	70	27	4	2	0.691025	0.78	49.8768	49.1	TP
2	Bench	70	27	4	3	0.75766	0.84	50.9267	49.8	TP
2	Bench	70	27	4	4	0.665501	0.74	51.324	48.6	TP
2	Bench	70	27	4	5	0.620963	0.67	49.1959	45.7	TP
2	Bench	70	27	4	6	0.533274	0.64	48.7639	50	TP
2	Bench	90	35	4	1		0.24		22.9	FP
2	Bench	90	35	4	2	0.516184	0.64	46.8902	46.8	TP
2	Bench	90	35	4	3	0.418045	0.43	48.6893	46.2	TP
2	Bench	90	35	4	4	0.422342	0.49	50.6757	50.2	TP
2	Bench	100	38	4	1		0.47		20.8	FP
2	Bench	100	38	4	2	0.275664	0.34	48.3439	45.8	TP
3	Bench	50	15	4	1	0.583081	0.75	33.2906	30.8	TP
3	Bench	50	15	4	2	0.727048	0.95	38.5296	39.6	TP
3	Bench	50	15	4	3	0.717768	1.05	39.7825	41.8	TP
3	Bench	50	15	4	4	0.678181	0.99	38.9842	42.6	TP
3	Bench	50	15	4	5	0.742934	0.97	40.8605	43.6	TP
3	Bench	70	22	4	1	0.521758	0.71	35.3834	37.1	TP
3	Bench	70	22	4	2	0.486043	0.71	37.7104	40.2	TP
3	Bench	70	22	4	3	0.481299	0.64	35.8726	39	TP
3	Bench	70	22	4	4	0.44281	0.62	35.9652	38.1	TP
3	Bench	70	22	4	5	0.475525	0.66	39.1731	43.5	TP
3	Bench	90	27	4	1	0.379548	0.42	30.5402	28.4	TP
3	Bench	90	27	4	2	0.366278	0.49	31.8103	31	TP
3	Bench	90	27	4	3	0.295662	0.34	32.3778	32.5	TP
3	Bench	100	30	4	1	0.274595	0.42	29.5944	30.2	TP
4	Bench	50	28	4	1	0.470257	0.71	28.1895	29.2	TP
4	Bench	50	28	4	2	0.494397	0.63	29.1183	30.1	TP
4	Bench	50	28	4	3	0.586657	0.71	31.2669	31.8	TP
4	Bench	50	28	4	4	0.592339	0.71	32.1235	33.1	TP
4	Bench	50	28	4	5	0.602623	0.77	33.4646	37.5	TP
4	Bench	90	50	4	1	0.371848	0.5	30.5423	32.3	TP
4	Bench	90	50	4	2	0.394585	0.46	29.9109	30.3	TP
4	Bench	90	50	4	3	0.39477	0.52	30.1529	32.8	TP
4	Bench	100	55	4	1	0.295313	0.46	29.1722	29.1	TP
5	Bench	50	55	4	1	0.863208	1.1	42.7249	44.1	TP
5	Bench	50	55	4	2	0.855675	1.01	42.7669	42.4	TP
5	Bench	50	55	4	3	0.866697	1.09	42.7419	42.8	TP
5	Bench	50	55	4	4	0.857066	1.03	42.8325	44.3	TP
5	Bench	50	55	4	5	0.900842	1.08	45.4444	44.1	TP
5	Bench	70	77	4	1	0.580877	0.84	38.9187	39.6	TP
5	Bench	70	77	4	2	0.562827	0.75	38.5094	38	TP
5	Bench	70	77	4	3	0.528485	0.69	38.2997	38.4	TP
5	Bench	70	77	4	4	0.525164	0.69	38.9154	40.4	TP
5	Bench	70	77	4	5	0.485255	0.66	40.2245	40	TP
5	Bench	90	100	4	1	0.320901	0.36	39.9503	40.7	TP
5	Bench	90	100	4	2	0.226975	0.28	39.4656	40.1	TP
5	Bench	90	100	4	3	0.258762	0.29	41.0646	40.3	TP
5	Bench	100	105	4	1	0.261707	0.35	40.6916	43.6	TP
6	Bench	50	25	4	1	0.761336	0.92	40.342	42.3	TP
6	Bench	50	25	4	2	0.769886	0.88	41.5687	42.7	TP
6	Bench	50	25	4	3	0.7594	0.85	42.8667	42.9	TP
6	Bench	50	25	4	4	0.772264	0.96	43.4917	43.8	TP
6	Bench	50	25	4	5	0.762396	0.9	42.2967	44.1	TP
6	Bench	70	35	4	1	0.622192	0.69	40.3276	39.3	TP
6	Bench	70	35	4	2	0.598757	0.64	41.9967	39.2	TP
6	Bench	70	35	4	3	0.546514	0.62	41.8512	41.4	TP
6	Bench	70	35	4	4	0.53037	0.62	42.2685	42.2	TP
6	Bench	70	35	4	5	0.51668	0.58	41.7655	43.8	TP
6	Bench	90	45	4	1	0.365164	0.44	39.8487	41.4	TP
6	Bench	90	45	4	2	0.302428	0.38	39.812	40.5	TP
6	Bench	90	45	4	3	0.235602	0.28	38.7794	37.3	TP
6	Bench	100	50	4	1	0.149984	0.41	34.2821	30.1	TP
7	Bench	50	35	4	1	0.803311	0.87	44.1222	44.7	TP
7	Bench	50	35	4	2	0.902683	0.9	49.6394	45.1	TP
7	Bench	50	35	4	3	0.887691	0.8	48.6427	46.9	TP
7	Bench	50	35	4	4	0.861603	0.95	50.2072	47.8	TP
7	Bench	50	35	4	5	0.787348	0.85	47.0039	46.2	TP
7	Bench	70	50	4	1	0.589802	0.63	43.1499	41.8	TP
7	Bench	70	50	4	2	0.586964	0.7	42.487	41.4	TP
7	Bench	70	50	4	3	0.460512	0.34	40.2323	36.5	TP
7	Bench	70	50	4	4	0.549498	0.64	39.6676	38.3	TP
7	Bench	70	50	4	5	0.539412	0.57	37.9896	35.8	TP
7	Bench	90	63	4	1		0.41		21.3	FP
7	Bench	90	63	4	2	0.421146	0.51	37.1953	34.7	TP
7	Bench	90	63	4	3	0.372532	0.42	35.4158	34.8	TP
7	Bench	90	63	4	4	0.360562	0.42	33.3627	32.5	TP
7	Bench	100	70	4	1		0.25		17.7	FP
7	Bench	100	70	4	2	0.326844	0.37	33.8777	32.9	TP
8	Bench	50	22	4	1	0.706516	0.9	45.2108	48.6	TP
8	Bench	50	22	4	2	0.705056	0.92	46.6315	50.5	TP
8	Bench	50	22	4	3	0.654232	0.81	46.684	46.8	TP
8	Bench	50	22	4	4	0.65509	0.8	45.1804	44	TP
8	Bench	50	22	4	5	0.650731	0.87	47.4813	51.5	TP
8	Bench	70	32	4	1		0.34		23	FP
8	Bench	70	32	4	2	0.543265	0.7	44.5498	43.6	TP
8	Bench	70	32	4	3	0.586037	0.74	47.2373	43.5	TP
8	Bench	70	32	4	4	0.55432	0.72	46.7164	49.3	TP
8	Bench	70	32	4	5	0.540534	0.57	46.6103	40.9	TP
8	Bench	70	32	4	6	0.522016	0.56	46.1725	45.4	TP
8	Bench	90	40	4	1	0.336986	0.46	42.4264	43.6	TP
8	Bench	90	40	4	2	0.311149	0.45	42.6334	42.4	TP
8	Bench	90	40	4	3	0.295173	0.4	42.5947	46.6	TP
8	Bench	100	45	4	1	0.208516	0.28	41.2445	42.8	TP
9	Bench	50	40	4	1	0.740041	0.91	40.6918	39	TP
9	Bench	50	40	4	2	0.768864	0.72	40.3938	37.3	TP
9	Bench	50	40	4	3	0.64873	0.66	39.2439	35.9	TP
9	Bench	50	40	4	4	0.71465	0.81	39.173	38.9	TP
9	Bench	50	40	4	5	0.737138	0.77	40.4284	37.2	TP
9	Bench	70	55	4	1	0.573915	0.74	38.5155	35.6	TP
9	Bench	70	55	4	2	0.531934	0.7	37.8639	35.1	TP
9	Bench	70	55	4	3	0.513424	0.7	39.3776	35.3	TP
9	Bench	70	55	4	4	0.50546	0.59	39.6031	36	TP
9	Bench	70	55	4	5	0.454059	0.51	39.1821	35.3	TP
9	Bench	90	72	4	1	0.321995	0.37	36.6042	37.2	TP
9	Bench	90	72	4	2	0.303913	0.34	36.0676	34.9	TP
9	Bench	90	72	4	3	0.17283	0.23	35.328	34.9	TP
9	Bench	100	80	4	1	0.178602	0.27	33.8313	32.2	TP
10	Bench	50	18	4	1	0.921042	1.19	50.2821	54	TP
10	Bench	50	18	4	2	0.938507	1.08	48.9831	50.3	TP
10	Bench	50	18	4	3	0.886881	1	49.495	44.9	TP
10	Bench	50	18	4	4	0.967169	1.11	52.4512	52.6	TP
10	Bench	50	18	4	5	1.01232	1.13	56.6605	55.9	TP
10	Bench	70	25	4	1	0.595295	0.63	44.785	39.4	TP
10	Bench	70	25	4	2	0.614047	0.74	47.1966	50.7	TP
10	Bench	70	25	4	3	0.596006	0.72	46.6682	47.3	TP
10	Bench	70	25	4	4	0.546858	0.67	45.4511	41	TP
10	Bench	70	25	4	5	0.481476	0.55	45.1994	44.7	TP
10	Bench	90	32	4	1	0.269473	0.31	39.5381	40.5	TP
10	Bench	90	32	4	2	0.272843	0.29	40.4351	37.1	TP
10	Bench	90	32	4	3	0.259008	0.26	41.6938	37.4	TP
10	Bench	100	35	4	1	0.184449	0.29	35.2807	36.3	TP
11	Bench	50	45	4	1	0.870152	1.16	43.6473	45.9	TP
11	Bench	50	45	4	2	0.870359	1.08	43.6231	46.4	TP
11	Bench	50	45	4	3	0.857097	1	43.0011	45.1	TP
11	Bench	50	45	4	4	0.83998	1.16	44.1504	49.5	TP
11	Bench	50	45	4	5	0.834473	1.18	45.2258	51	TP
11	Bench	70	63	4	1	0.669855	0.77	42.8597	47.5	TP
11	Bench	70	63	4	2	0.670587	0.76	44.213	47.8	TP
11	Bench	70	63	4	3	0.617779	0.7	43.9877	45.4	TP
11	Bench	70	63	4	4	0.60927	0.74	45.1053	47	TP
11	Bench	70	63	4	5	0.581802	0.68	46.3056	48.5	TP
11	Bench	90	80	4	1	0.461289	0.51	43.0579	46	TP
11	Bench	90	80	4	2	0.387105	0.45	43.3971	45.7	TP
11	Bench	90	80	4	3	0.343789	0.41	42.9994	46	TP
11	Bench	100	90	4	1	0.279796	0.29	42.1308	40.3	TP
12	Bench	50	48	4	1	0.702196	1	40.0035	40.7	TP
12	Bench	50	48	4	2	0.72168	0.94	41.4828	39.9	TP
12	Bench	50	48	4	3	0.72345	0.91	42.3053	43.4	TP
12	Bench	50	48	4	4	0.71729	0.82	41.218	41.5	TP
12	Bench	50	48	4	5	0.720473	0.91	42.496	42.9	TP
12	Bench	70	67	4	1	0.5501	0.78	38.1998	36.5	TP
12	Bench	70	67	4	2	0.488612	0.66	39.0551	40.3	TP
12	Bench	70	67	4	3	0.472393	0.61	39.8902	41.3	TP
12	Bench	70	67	4	4	0.478255	0.6	40.3714	41.6	TP
12	Bench	70	67	4	5	0.489652	0.6	40.4605	40.1	TP
12	Bench	90	85	4	2	0.262353	0.33	37.5142	37.8	TP
12	Bench	90	85	4	3	0.257787	0.33	37.2602	37.2	TP
12	Bench	100	95	4	1	0.183787	0.2	35.6134	34.8	TP
13	Bench	50	45	4	1	1.09345	1.11	50.766	47.5	TP
13	Bench	50	45	4	2	1.16332	1.14	51.3223	48.5	TP
13	Bench	50	45	4	3	1.19897	1.24	53.1648	51.3	TP
13	Bench	50	45	4	4	1.17085	1.22	51.5931	49.9	TP
13	Bench	50	45	4	5	1.1611	1.18	50.1737	47.6	TP
13	Bench	70	63	4	1	0.903044	1.07	50.7924	51.1	TP
13	Bench	70	63	4	2	0.915528	0.99	53.47	54.5	TP
13	Bench	70	63	4	3	0.876068	0.96	53.3822	48.1	TP
13	Bench	70	63	4	4	0.859741	0.97	53.6543	54.7	TP
13	Bench	70	63	4	5	0.823566	0.93	53.0266	54.1	TP
13	Bench	90	80	4	1	0.632954	0.73	49.2128	46.9	TP
13	Bench	90	80	4	2	0.53067	0.59	50.6729	52.1	TP
13	Bench	90	80	4	3	0.551655	0.63	50.3447	51.4	TP
13	Bench	100	90	4	1	0.495517	0.49	50.0939	44.8	TP
14	Bench	50	40	4	1	1.0054	0.66	49.761	47	TP
14	Bench	50	40	4	2	0.993876	1.1	51.8498	49.8	TP
14	Bench	50	40	4	3	0.908586	1.02	48.9136	45.9	TP
14	Bench	50	40	4	4	0.941374	0.93	50.0607	48.8	TP
14	Bench	50	40	4	5	0.891178	0.97	49.1751	48.4	TP
14	Bench	70	57	4	1	0.753834	0.74	48.4897	46.7	TP
14	Bench	70	57	4	2	0.770572	0.82	49.978	45.8	TP
14	Bench	70	57	4	3	0.726702	0.75	50.1204	45.7	TP
14	Bench	70	57	4	4	0.697912	0.71	49.1989	46.3	TP
14	Bench	70	57	4	5	0.742941	0.78	48.421	44	TP
14	Bench	90	72	4	1	0.571013	0.58	48.9358	46	TP
14	Bench	90	72	4	2	0.541305	0.42	49.4212	42.9	TP
14	Bench	90	72	4	3	0.470361	0.44	47.6334	43.1	TP
14	Bench	100	80	4	1	0.464337	0.46	47.6682	40.7	TP
15	Bench	50	53	4	1	1.00557	1.1	49.7759	47.3	TP
15	Bench	50	53	4	2	1.0046	0.98	51.7419	51.6	TP
15	Bench	50	53	4	3	0.961967	1.03	53.4268	51.5	TP
15	Bench	50	53	4	4	0.984848	0.98	52.6268	50.7	TP
15	Bench	50	53	4	5	0.949256	1.11	51.2404	49.6	TP
15	Bench	70	73	4	1	0.724906	0.78	48.995	42.7	TP
15	Bench	70	73	4	2	0.702424	0.77	47.9965	45.2	TP
15	Bench	70	73	4	3	0.703809	0.74	49.3689	48.6	TP
15	Bench	70	73	4	4	0.679808	0.74	48.6714	44.5	TP
15	Bench	70	73	4	5	0.586857	0.73	50.2295	49.4	TP
15	Bench	90	95	4	2	0.265524	0.32	46.4291	41.8	TP
15	Bench	90	95	4	3	0.230569	0.28	46.4189	41.7	TP
15	Bench	100	105	4	1	0.11978	0.23	47.0602	41.6	TP
16	Bench	50	18	4	1	0.488254	0.62	37.8889	37.5	TP
16	Bench	50	18	4	2	0.619493	0.84	35.3058	34	TP
16	Bench	50	18	4	3	0.733579	1.01	39.1622	41.5	TP
16	Bench	50	18	4	4	0.771825	0.92	39.7406	37.5	TP
16	Bench	50	18	4	5	0.771233	1.02	39.2912	38.6	TP
16	Bench	70	25	4	1		0.49		20.5	FP
16	Bench	70	25	4	2	0.50094	0.52	35.9885	33.2	TP
16	Bench	70	25	4	3	0.508021	0.63	36.7514	35.4	TP
16	Bench	70	25	4	4	0.507637	0.6	38.3944	37.3	TP
16	Bench	70	25	4	5	0.458363	0.56	37.5374	35	TP
16	Bench	70	25	4	6	0.464857	0.54	37.0161	36.6	TP
16	Bench	90	33	4	1		0.49		19.3	FP
16	Bench	90	33	4	2	0.346012	0.41	32.536	26.9	TP
16	Bench	90	33	4	3	0.324435	0.42	35.8261	33.4	TP
16	Bench	90	33	4	4	0.291397	0.36	32.8046	30.8	TP
16	Bench	100	37	4	1		0.17		16.2	FP
16	Bench	100	37	4	2	0.197358	0.2	31.5951	27.4	TP
17	Bench	50	80	4	1	0.815227	0.97	35.2917	34.4	TP
17	Bench	50	80	4	2	0.870964	1.04	36.7259	35.4	TP
17	Bench	50	80	4	3	0.846257	0.99	36.5415	38.4	TP
17	Bench	50	80	4	4	0.843209	0.96	37.3856	39.7	TP
17	Bench	50	80	4	5	0.854185	1	37.8791	42.2	TP
17	Bench	70	112	4	1	0.539007	0.67	28.5107	29.4	TP
17	Bench	70	112	4	2	0.490275	0.49	32.8329	30.8	TP
17	Bench	70	112	4	3	0.542317	0.68	28.9444	30.8	TP
17	Bench	70	112	4	4	0.541148		29.6874		FN
17	Bench	70	112	4	5	0.527213	0.61	35.5098	36.8	TP
17	Bench	90	145	4	1	0.309876		26.5853		FN
17	Bench	90	145	4	2	0.275242		27.6296		FN
17	Bench	90	145	4	3	0.168754		33.6091		FN
17	Bench	100	160	4	1	0.185855	0.24	33.3922	36.2	TP
18	Bench	50	11	4	1	0.931191	1.03	46.8622	45	TP
18	Bench	50	11	4	2	0.845644	0.69	46.5077	50.2	TP
18	Bench	50	11	4	3	0.88323	1.02	45.8924	44.7	TP
18	Bench	50	11	4	4	0.863059	0.95	47.4399	44.2	TP
18	Bench	50	11	4	5	0.876469	1.15	47.7417	47.1	TP
18	Bench	70	18	4	1	0.60388	0.75	44.2176	40.4	TP
18	Bench	70	18	4	2	0.637252	0.79	45.8277	42.3	TP
18	Bench	70	18	4	3	0.545161	0.68	44.865	41.3	TP
18	Bench	70	18	4	4	0.557738	0.59	46.2775	40.5	TP
18	Bench	70	18	4	5	0.543127	0.63	44.1262	41.1	TP
18	Bench	90	22	4	1	0.391429	0.38	42.7578	44.1	TP
18	Bench	90	22	4	2	0.333185	0.39	41.6866	39.1	TP
18	Bench	90	22	4	3	0.301612	0.3	40.8735	37.6	TP
18	Bench	100	25	4	1	0.269412	0.26	42.0387	35	TP
19	Bench	50	11	4	1	1.04037	1.14	43.0202	43.5	TP
19	Bench	50	11	4	2	0.868841	1.02	43.8667	44.5	TP
19	Bench	50	11	4	3	0.914611	1.11	46.1422	46.3	TP
19	Bench	50	11	4	4	0.813842	1.02	45.1436	46.6	TP
19	Bench	50	11	4	5	0.920857	1.2	45.5785	44	TP
19	Bench	50	11	4	6	0.908872	1.19	46.6365	52.3	TP
19	Bench	70	18	4	1	0.680243	0.8	40.765	37.1	TP
19	Bench	70	18	4	2	0.597371	0.69	43.8582	35.4	TP
19	Bench	70	18	4	3	0.592088	0.74	44.8293	41.7	TP
19	Bench	70	18	4	4	0.672536	0.75	44.6101	40.6	TP
19	Bench	70	18	4	5	0.439248	0.52	43.9234	41.9	TP
19	Bench	90	22	4	1	0.378246	0.48	42.7374	43.7	TP
19	Bench	90	22	4	2	0.351354	0.43	43.4743	41.9	TP
19	Bench	90	22	4	3	0.401192	0.52	45.7353	45.7	TP
19	Bench	100	25	4	1	0.303965	0.32	46.1604	44.2	TP
20	Bench	50	25	4	1	0.990958	1.15	53.499	53.6	TP
20	Bench	50	25	4	2	1.02469	1.2	56.2057	53.1	TP
20	Bench	50	25	4	3	1.04318	1.24	56.9644	58.2	TP
20	Bench	50	25	4	4	1.01529	1.22	57.0927	59.4	TP
20	Bench	50	25	4	5	1.03846	1.15	58.9557	59.5	TP
20	Bench	70	35	4	1	0.793317	0.98	54.6081	55.6	TP
20	Bench	70	35	4	2	0.745678	0.93	54.4808	52.9	TP
20	Bench	70	35	4	3	0.686049	0.82	50.9164	49.5	TP
20	Bench	70	35	4	4	0.735395	0.87	53.9888	52.3	TP
20	Bench	70	35	4	5	0.697487	0.86	54.4447	54	TP
20	Bench	90	45	4	1	0.403428	0.47	51.9569	53.6	TP
20	Bench	90	45	4	2	0.378081	0.44	51.9476	56	TP
20	Bench	90	45	4	3	0.359824	0.4	54.0284	55.4	TP
20	Bench	100	50	4	1	0.160261	0.3	45.6424	45.3	TP
21	Bench	50	25	4	1	0.828315	0.87	41.687	39.8	TP
21	Bench	50	25	4	2	0.866019	0.9	41.4657	39.4	TP
21	Bench	50	25	4	3	0.863828	0.93	43.4189	43.6	TP
21	Bench	50	25	4	4	0.799532	0.86	42.3176	42.1	TP
21	Bench	50	25	4	5	0.786329	0.84	44.0141	43.9	TP
21	Bench	70	37	4	1	0.601506	0.7	42.0942	44.5	TP
21	Bench	70	37	4	2	0.584198	0.58	42.8498	43.3	TP
21	Bench	70	37	4	3	0.540996	0.58	41.3828	40.9	TP
21	Bench	70	37	4	4	0.505362	0.59	44.1592	45.6	TP
21	Bench	70	37	4	5	0.413165	0.49	39.641	42.5	TP
21	Bench	90	47	4	1	0.248722	0.27	41.5544	42.3	TP
21	Bench	90	47	4	2	0.189335	0.2	39.0221	38.8	TP
21	Bench	90	47	4	3	0.102674		24.2238		FN
21	Bench	100	50	4	1	0.276528	0.3	38.0073	38.4	TP
22	Bench	50	35	4	1	0.891843	0.88	40.7067	38.5	TP
22	Bench	50	35	4	2	0.892766	0.88	41.9172	38.6	TP
22	Bench	50	35	4	3	0.854756	0.85	43.0413	41.6	TP
22	Bench	50	35	4	4	0.850491	0.8	42.9484	39.2	TP
22	Bench	50	35	4	5	0.852921	0.9	44.3227	45.5	TP
22	Bench	70	50	4	1		0.19		22.1	FP
22	Bench	70	50	4	2	0.687207	0.65	38.2964	36.2	TP
22	Bench	70	50	4	3	0.682856	0.68	40.9611	41.1	TP
22	Bench	70	50	4	4	0.61005	0.59	38.7336	36.1	TP
22	Bench	70	50	4	5	0.574714	0.56	37.9567	37.2	TP
22	Bench	70	50	4	6	0.580202	0.54	39.0677	35.2	TP
22	Bench	90	63	4	1	0.442394	0.41	36.0447	30.6	TP
22	Bench	90	63	4	2	0.423548	0.36	35.9387	32.5	TP
22	Bench	90	63	4	3	0.38265	0.32	34.4722	30.2	TP
22	Bench	100	70	4	1	0.357348	0.34	35.9294	34.1	TP
23	Bench	50	35	4	1	0.82781	0.78	41.8107	36.9	TP
23	Bench	50	35	4	2	0.839754	0.83	43.4208	40.7	TP
23	Bench	50	35	4	3	0.860468	0.81	43.0791	38.3	TP
23	Bench	50	35	4	4	0.842499	0.81	43.0972	39.5	TP
23	Bench	50	35	4	5	0.85523	0.8	43.8615	39.8	TP
23	Bench	70	42	4	1	0.660986	0.68	42.2456	42.4	TP
23	Bench	70	42	4	2	0.667058	0.68	42.8835	41.3	TP
23	Bench	70	42	4	3	0.635851	0.62	43.3126	42.7	TP
23	Bench	70	42	4	4	0.649216	0.64	44.3512	42.1	TP
23	Bench	70	42	4	5	0.60693	0.59	42.7867	40.8	TP
23	Bench	90	55	4	1	0.337594	0.3	45.438	38.4	TP
23	Bench	90	55	4	2	0.280892	0.25	45.2622	40.3	TP
23	Bench	90	55	4	3	0.119281	0.1	43.0447	38.7	TP
23	Bench	100	60	4	1	0.0736607		17.5135		FN
24	Bench	50	30	4	1	0.828233	0.84	49.0231	48.2	TP
24	Bench	50	30	4	2	0.827941	0.85	48.6656	48.4	TP
24	Bench	50	30	4	3	0.858371	0.8	48.6465	45.6	TP
24	Bench	50	30	4	4	0.843142	0.8	49.6564	46.8	TP
24	Bench	50	30	4	5	0.784827	0.8	48.2593	47.6	TP
24	Bench	70	42	4	1	0.540031	0.62	45.8962	47.9	TP
24	Bench	70	42	4	2	0.542624	0.58	45.7236	47.6	TP
24	Bench	70	42	4	3	0.506986	0.54	45.4681	47.8	TP
24	Bench	70	42	4	4	0.431372	0.44	45.6267	47.9	TP
24	Bench	70	42	4	5	0.419949	0.41	44.7211	45.6	TP
24	Bench	90	53	4	1	0.356864	0.34	45.0699	44.8	TP
24	Bench	90	53	4	2	0.319409	0.31	45.9796	45.7	TP
24	Bench	90	53	4	3	0.349408	0.33	44.9932	44	TP
24	Bench	100	60	4	1	0.208014		45.5363		FN
1	Bench	50	17	5	1	0.846758	0.89	41.6237	38.4	TP
1	Bench	50	17	5	2	0.851376	0.91	42.7115	37.7	TP
1	Bench	50	17	5	3	0.924967	1.05	44.3793	44.3	TP
1	Bench	50	17	5	4	0.940691	1.09	44.5946	44.3	TP
1	Bench	50	17	5	5	0.77134	0.93	43.4422	40.6	TP
1	Bench	70	23	5	1	0.539444	0.71	39.8609	36.5	TP
1	Bench	70	23	5	2	0.53499	0.59	40.6532	36.6	TP
1	Bench	70	23	5	3	0.552992	0.73	41.9973	42.2	TP
1	Bench	70	23	5	4	0.541417	0.7	42.8056	37.9	TP
1	Bench	70	23	5	5	0.516183	0.65	41.8755	42	TP
1	Bench	90	30	5	1	0.311992	0.49	39.4202	34.7	TP
1	Bench	90	30	5	2	0.320175	0.36	42.5304	38.4	TP
1	Bench	90	30	5	3	0.312305	0.4	42.1801	36.4	TP
1	Bench	100	33	5	1	0.293631	0.34	41.3133	36	TP
2	Bench	50	20	5	1		0.34		26.9	FP
2	Bench	50	20	5	2	0.891312	1.19	50.8823	50.1	TP
2	Bench	50	20	5	3	0.949777	1.13	51.242	51.6	TP
2	Bench	50	20	5	4	0.88329	1.07	49.9381	49.3	TP
2	Bench	50	20	5	5	0.871385	0.99	51.9498	51.9	TP
2	Bench	50	20	5	6	0.849636	1.02	47.9704	44.5	TP
2	Bench	70	27	5	1		0.35		26	FP
2	Bench	70	27	5	2	0.691025	0.74	49.8768	48.6	TP
2	Bench	70	27	5	3	0.75766	0.81	50.9267	49.7	TP
2	Bench	70	27	5	4	0.665501	0.67	51.324	48.6	TP
2	Bench	70	27	5	5	0.620963	0.68	49.1959	45.8	TP
2	Bench	70	27	5	6	0.533274	0.6	48.7639	49.6	TP
2	Bench	90	35	5	1		0.3		23.2	FP
2	Bench	90	35	5	2	0.516184	0.66	46.8902	46.3	TP
2	Bench	90	35	5	3	0.418045	0.46	48.6893	46.6	TP
2	Bench	90	35	5	4	0.422342	0.51	50.6757	49.4	TP
2	Bench	100	38	5	1		0.42		21.3	FP
2	Bench	100	38	5	2	0.275664	0.37	48.3439	46	TP
3	Bench	50	15	5	1	0.583081	0.75	33.2906	31	TP
3	Bench	50	15	5	2	0.727048	0.91	38.5296	38.9	TP
3	Bench	50	15	5	3	0.717768	0.97	39.7825	41.9	TP
3	Bench	50	15	5	4	0.678181	0.91	38.9842	42.1	TP
3	Bench	50	15	5	5	0.742934	0.89	40.8605	42.8	TP
3	Bench	70	22	5	1	0.521758	0.77	35.3834	37.2	TP
3	Bench	70	22	5	2	0.486043	0.65	37.7104	38.9	TP
3	Bench	70	22	5	3	0.481299	0.72	35.8726	38.7	TP
3	Bench	70	22	5	4	0.44281	0.58	35.9652	36.8	TP
3	Bench	70	22	5	5	0.475525	0.63	39.1731	43	TP
3	Bench	90	27	5	1	0.379548	0.43	30.5402	28.6	TP
3	Bench	90	27	5	2	0.366278	0.44	31.8103	30.9	TP
3	Bench	90	27	5	3	0.295662	0.35	32.3778	32.6	TP
3	Bench	100	30	5	1	0.274595	0.41	29.5944	30.9	TP
4	Bench	50	28	5	1	0.470257	0.66	28.1895	29.6	TP
4	Bench	50	28	5	2	0.494397	0.63	29.1183	30.5	TP
4	Bench	50	28	5	3	0.586657	0.67	31.2669	31.9	TP
4	Bench	50	28	5	4	0.592339	0.68	32.1235	32.7	TP
4	Bench	50	28	5	5	0.602623	0.67	33.4646	37.6	TP
4	Bench	90	50	5	1	0.371848	0.43	30.5423	32.1	TP
4	Bench	90	50	5	2	0.394585	0.47	29.9109	30.3	TP
4	Bench	90	50	5	3	0.39477	0.47	30.1529	32.6	TP
4	Bench	100	55	5	1	0.295313	0.41	29.1722	29.1	TP
5	Bench	50	55	5	1	0.863208	0.96	42.7249	44.6	TP
5	Bench	50	55	5	2	0.855675	0.91	42.7669	41.3	TP
5	Bench	50	55	5	3	0.866697	1.06	42.7419	44.1	TP
5	Bench	50	55	5	4	0.857066	0.95	42.8325	44.9	TP
5	Bench	50	55	5	5	0.900842	0.96	45.4444	44.4	TP
5	Bench	70	77	5	1	0.580877	0.72	38.9187	40.5	TP
5	Bench	70	77	5	2	0.562827	0.71	38.5094	37.5	TP
5	Bench	70	77	5	3	0.528485	0.74	38.2997	38.8	TP
5	Bench	70	77	5	4	0.525164	0.66	38.9154	40	TP
5	Bench	70	77	5	5	0.485255	0.62	40.2245	40.2	TP
5	Bench	90	100	5	1	0.320901	0.35	39.9503	38.9	TP
5	Bench	90	100	5	2	0.226975	0.26	39.4656	38.8	TP
5	Bench	90	100	5	3	0.258762	0.3	41.0646	39.4	TP
5	Bench	100	105	5	1	0.261707	0.32	40.6916	43.8	TP
6	Bench	50	25	5	1	0.761336	0.88	40.342	42.6	TP
6	Bench	50	25	5	2	0.769886	0.88	41.5687	43	TP
6	Bench	50	25	5	3	0.7594	0.87	42.8667	43	TP
6	Bench	50	25	5	4	0.772264	0.85	43.4917	44.2	TP
6	Bench	50	25	5	5	0.762396	0.84	42.2967	43.4	TP
6	Bench	70	35	5	1	0.622192	0.69	40.3276	40.4	TP
6	Bench	70	35	5	2	0.598757	0.61	41.9967	39.7	TP
6	Bench	70	35	5	3	0.546514	0.59	41.8512	41.9	TP
6	Bench	70	35	5	4	0.53037	0.58	42.2685	42.6	TP
6	Bench	70	35	5	5	0.51668	0.58	41.7655	44.4	TP
6	Bench	90	45	5	1	0.365164	0.44	39.8487	42.5	TP
6	Bench	90	45	5	2	0.302428	0.39	39.812	41.5	TP
6	Bench	90	45	5	3	0.235602	0.31	38.7794	37.9	TP
6	Bench	100	50	5	1	0.149984	0.43	34.2821	30.2	TP
7	Bench	50	35	5	1	0.803311	0.87	44.1222	44.6	TP
7	Bench	50	35	5	2	0.902683	0.89	49.6394	44.8	TP
7	Bench	50	35	5	3	0.887691	0.95	48.6427	47.2	TP
7	Bench	50	35	5	4	0.861603	0.91	50.2072	48	TP
7	Bench	50	35	5	5	0.787348	0.84	47.0039	46.3	TP
7	Bench	70	50	5	1	0.589802	0.65	43.1499	41.1	TP
7	Bench	70	50	5	2	0.586964	0.65	42.487	40.5	TP
7	Bench	70	50	5	3	0.460512	0.49	40.2323	36.6	TP
7	Bench	70	50	5	4	0.549498	0.61	39.6676	37.2	TP
7	Bench	70	50	5	5	0.539412	0.61	37.9896	35.8	TP
7	Bench	90	63	5	1		0.34		21.2	FP
7	Bench	90	63	5	2	0.421146	0.5	37.1953	34.7	TP
7	Bench	90	63	5	3	0.372532	0.43	35.4158	35.8	TP
7	Bench	90	63	5	4	0.360562	0.47	33.3627	34	TP
7	Bench	100	70	5	1		0.26		20	FP
7	Bench	100	70	5	2	0.326844	0.39	33.8777	32.8	TP
8	Bench	50	22	5	1	0.706516	0.87	45.2108	47.9	TP
8	Bench	50	22	5	2	0.705056	0.92	46.6315	49.5	TP
8	Bench	50	22	5	3	0.654232	0.79	46.684	46.2	TP
8	Bench	50	22	5	4	0.65509	0.75	45.1804	43.1	TP
8	Bench	50	22	5	5	0.650731	0.77	47.4813	50	TP
8	Bench	70	32	5	1	0.543265	0.72	44.5498	45.8	TP
8	Bench	70	32	5	2	0.586037	0.71	47.2373	44.1	TP
8	Bench	70	32	5	3	0.55432	0.77	46.7164	48.4	TP
8	Bench	70	32	5	4	0.540534	0.62	46.6103	42.4	TP
8	Bench	70	32	5	5	0.522016	0.58	46.1725	45.8	TP
8	Bench	90	40	5	1	0.336986	0.42	42.4264	40	TP
8	Bench	90	40	5	2	0.311149	0.38	42.6334	42	TP
8	Bench	90	40	5	3	0.295173	0.37	42.5947	43.5	TP
8	Bench	100	45	5	1	0.208516	0.3	41.2445	42.6	TP
9	Bench	50	40	5	1	0.740041	0.84	40.6918	40.5	TP
9	Bench	50	40	5	2	0.768864	0.82	40.3938	39.1	TP
9	Bench	50	40	5	3	0.64873	0.68	39.2439	36.2	TP
9	Bench	50	40	5	4	0.71465	0.8	39.173	39.3	TP
9	Bench	50	40	5	5	0.737138	0.75	40.4284	37.3	TP
9	Bench	70	55	5	1	0.573915	0.65	38.5155	37.1	TP
9	Bench	70	55	5	2	0.531934	0.6	37.8639	35.7	TP
9	Bench	70	55	5	3	0.513424	0.53	39.3776	36.6	TP
9	Bench	70	55	5	4	0.50546	0.56	39.6031	37.3	TP
9	Bench	70	55	5	5	0.454059	0.53	39.1821	36.8	TP
9	Bench	90	72	5	1	0.321995	0.38	36.6042	36.4	TP
9	Bench	90	72	5	2	0.303913	0.34	36.0676	35.1	TP
9	Bench	90	72	5	3	0.17283	0.24	35.328	34.3	TP
9	Bench	100	80	5	1	0.178602	0.2	33.8313	32.6	TP
10	Bench	50	18	5	1	0.921042	1.09	50.2821	53.2	TP
10	Bench	50	18	5	2	0.938507	1.08	48.9831	49.7	TP
10	Bench	50	18	5	3	0.886881	0.96	49.495	46.6	TP
10	Bench	50	18	5	4	0.967169	1.12	52.4512	51.8	TP
10	Bench	50	18	5	5	1.01232	1.17	56.6605	55	TP
10	Bench	70	25	5	1	0.595295	0.66	44.785	41.8	TP
10	Bench	70	25	5	2	0.614047	0.73	47.1966	49	TP
10	Bench	70	25	5	3	0.596006	0.68	46.6682	46.6	TP
10	Bench	70	25	5	4	0.546858	0.6	45.4511	43.5	TP
10	Bench	70	25	5	5	0.481476	0.55	45.1994	44.5	TP
10	Bench	90	32	5	1	0.269473	0.34	39.5381	41.2	TP
10	Bench	90	32	5	2	0.272843	0.31	40.4351	38	TP
10	Bench	90	32	5	3	0.259008	0.27	41.6938	39.2	TP
10	Bench	100	35	5	1	0.184449	0.28	35.2807	36.7	TP
11	Bench	50	45	5	1	0.870152	1	43.6473	46.2	TP
11	Bench	50	45	5	2	0.870359	1.01	43.6231	46.1	TP
11	Bench	50	45	5	3	0.857097	0.94	43.0011	46.3	TP
11	Bench	50	45	5	4	0.83998	0.94	44.1504	47.9	TP
11	Bench	50	45	5	5	0.834473	0.95	45.2258	50.2	TP
11	Bench	70	63	5	1	0.669855	0.77	42.8597	46.5	TP
11	Bench	70	63	5	2	0.670587	0.76	44.213	46.9	TP
11	Bench	70	63	5	3	0.617779	0.68	43.9877	44.5	TP
11	Bench	70	63	5	4	0.60927	0.67	45.1053	47.6	TP
11	Bench	70	63	5	5	0.581802	0.65	46.3056	47.9	TP
11	Bench	90	80	5	1	0.461289	0.51	43.0579	44.9	TP
11	Bench	90	80	5	2	0.387105	0.44	43.3971	45.1	TP
11	Bench	90	80	5	3	0.343789	0.39	42.9994	45.7	TP
11	Bench	100	90	5	1	0.279796	0.3	42.1308	42.7	TP
12	Bench	50	48	5	1	0.702196	0.88	40.0035	40.9	TP
12	Bench	50	48	5	2	0.72168	0.78	41.4828	41.3	TP
12	Bench	50	48	5	3	0.72345	0.86	42.3053	43	TP
12	Bench	50	48	5	4	0.71729	0.88	41.218	42.2	TP
12	Bench	50	48	5	5	0.720473	0.85	42.496	42.8	TP
12	Bench	70	67	5	1	0.5501	0.65	38.1998	37.5	TP
12	Bench	70	67	5	2	0.488612	0.61	39.0551	40.6	TP
12	Bench	70	67	5	3	0.472393	0.6	39.8902	42.1	TP
12	Bench	70	67	5	4	0.478255	0.62	40.3714	43.2	TP
12	Bench	70	67	5	5	0.489652	0.63	40.4605	42.7	TP
12	Bench	90	85	5	2	0.262353	0.31	37.5142	37.4	TP
12	Bench	90	85	5	3	0.257787	0.35	37.2602	36.5	TP
12	Bench	100	95	5	1	0.183787	0.21	35.6134	35.6	TP
13	Bench	50	45	5	1	1.09345	1.14	50.766	47.5	TP
13	Bench	50	45	5	2	1.16332	1.24	51.3223	48.6	TP
13	Bench	50	45	5	3	1.19897	1.25	53.1648	51.5	TP
13	Bench	50	45	5	4	1.17085	1.28	51.5931	51.2	TP
13	Bench	50	45	5	5	1.1611	1.23	50.1737	47.5	TP
13	Bench	70	63	5	1	0.903044	1	50.7924	50.4	TP
13	Bench	70	63	5	2	0.915528	1.02	53.47	55.4	TP
13	Bench	70	63	5	3	0.876068	0.92	53.3822	52.8	TP
13	Bench	70	63	5	4	0.859741	0.96	53.6543	55.7	TP
13	Bench	70	63	5	5	0.823566	0.93	53.0266	55	TP
13	Bench	90	80	5	1	0.632954	0.72	49.2128	47.9	TP
13	Bench	90	80	5	2	0.53067	0.61	50.6729	52.1	TP
13	Bench	90	80	5	3	0.551655	0.61	50.3447	50.8	TP
13	Bench	100	90	5	1	0.495517	0.52	50.0939	46.4	TP
14	Bench	50	40	5	1	1.0054	1.06	49.761	47.7	TP
14	Bench	50	40	5	2	0.993876	1.03	51.8498	49.6	TP
14	Bench	50	40	5	3	0.908586	0.98	48.9136	46.7	TP
14	Bench	50	40	5	4	0.941374	0.98	50.0607	47.7	TP
14	Bench	50	40	5	5	0.891178	0.98	49.1751	48.8	TP
14	Bench	70	57	5	1	0.753834	0.79	48.4897	47.4	TP
14	Bench	70	57	5	2	0.770572	0.79	49.978	46.7	TP
14	Bench	70	57	5	3	0.726702	0.76	50.1204	46.8	TP
14	Bench	70	57	5	4	0.697912	0.75	49.1989	47.2	TP
14	Bench	70	57	5	5	0.742941	0.81	48.421	44.3	TP
14	Bench	90	72	5	1	0.571013	0.56	48.9358	45.9	TP
14	Bench	90	72	5	2	0.541305	0.52	49.4212	44.4	TP
14	Bench	90	72	5	3	0.470361	0.46	47.6334	44	TP
14	Bench	100	80	5	1	0.464337	0.5	47.6682	45.1	TP
15	Bench	50	53	5	1	1.00557	1.09	49.7759	46.9	TP
15	Bench	50	53	5	2	1.0046	1.07	51.7419	50.2	TP
15	Bench	50	53	5	3	0.961967	1.03	53.4268	50.3	TP
15	Bench	50	53	5	4	0.984848	1.09	52.6268	50	TP
15	Bench	50	53	5	5	0.949256	1.03	51.2404	48.2	TP
15	Bench	70	73	5	1	0.724906	0.75	48.995	44.9	TP
15	Bench	70	73	5	2	0.702424	0.73	47.9965	45.9	TP
15	Bench	70	73	5	3	0.703809	0.76	49.3689	47.4	TP
15	Bench	70	73	5	4	0.679808	0.66	48.6714	43.3	TP
15	Bench	70	73	5	5	0.586857	0.6	50.2295	47.5	TP
15	Bench	90	95	5	2	0.265524	0.31	46.4291	42	TP
15	Bench	90	95	5	3	0.230569	0.29	46.4189	42.9	TP
15	Bench	100	105	5	1	0.11978	0.19	47.0602	43.2	TP
16	Bench	50	18	5	1	0.488254	0.64	37.8889	37.1	TP
16	Bench	50	18	5	2	0.619493	0.72	35.3058	35.2	TP
16	Bench	50	18	5	3	0.733579	0.89	39.1622	41.4	TP
16	Bench	50	18	5	4	0.771825	0.84	39.7406	37.2	TP
16	Bench	50	18	5	5	0.771233	0.86	39.2912	39.1	TP
16	Bench	70	25	5	1		0.47		20.3	FP
16	Bench	70	25	5	2	0.50094	0.63	35.9885	34.4	TP
16	Bench	70	25	5	3	0.508021	0.63	36.7514	36.5	TP
16	Bench	70	25	5	4	0.507637	0.63	38.3944	38.4	TP
16	Bench	70	25	5	5	0.458363	0.52	37.5374	35.5	TP
16	Bench	70	25	5	6	0.464857	0.62	37.0161	37.6	TP
16	Bench	90	33	5	1	0.346012	0.41	32.536	27.1	TP
16	Bench	90	33	5	2	0.324435	0.41	35.8261	35.5	TP
16	Bench	90	33	5	3	0.291397	0.37	32.8046	31.8	TP
16	Bench	100	37	5	1		0.17		15.8	FP
16	Bench	100	37	5	2	0.197358	0.2	31.5951	27.8	TP
17	Bench	50	80	5	1	0.815227	0.9	35.2917	35	TP
17	Bench	50	80	5	2	0.870964	0.97	36.7259	37.2	TP
17	Bench	50	80	5	3	0.846257	0.88	36.5415	37.4	TP
17	Bench	50	80	5	4	0.843209	0.93	37.3856	38.4	TP
17	Bench	50	80	5	5	0.854185	0.92	37.8791	40.3	TP
17	Bench	70	112	5	1	0.539007	0.64	28.5107	29.4	TP
17	Bench	70	112	5	2	0.490275	0.53	32.8329	31.1	TP
17	Bench	70	112	5	3	0.542317	0.64	28.9444	30.3	TP
17	Bench	70	112	5	4	0.541148	0.59	29.6874	30.6	TP
17	Bench	70	112	5	5	0.527213	0.62	35.5098	37.2	TP
17	Bench	90	145	5	1	0.309876	0.35	26.5853	27.1	TP
17	Bench	90	145	5	2	0.275242	0.35	27.6296	26.7	TP
17	Bench	90	145	5	3	0.168754		33.6091		FN
17	Bench	100	160	5	1	0.185855	0.26	33.3922	35.2	TP
18	Bench	50	11	5	1	0.931191	0.97	46.8622	44.9	TP
18	Bench	50	11	5	2	0.845644	0.94	46.5077	50.4	TP
18	Bench	50	11	5	3	0.88323	0.99	45.8924	45.3	TP
18	Bench	50	11	5	4	0.863059	1.06	47.4399	43.7	TP
18	Bench	50	11	5	5	0.876469	1	47.7417	47.7	TP
18	Bench	70	18	5	1	0.60388	0.77	44.2176	40.8	TP
18	Bench	70	18	5	2	0.637252	0.72	45.8277	42.4	TP
18	Bench	70	18	5	3	0.545161	0.62	44.865	42	TP
18	Bench	70	18	5	4	0.557738	0.59	46.2775	42	TP
18	Bench	70	18	5	5	0.543127	0.69	44.1262	41.5	TP
18	Bench	90	22	5	1	0.391429	0.41	42.7578	45.6	TP
18	Bench	90	22	5	2	0.333185	0.39	41.6866	40.5	TP
18	Bench	90	22	5	3	0.301612	0.33	40.8735	38.8	TP
18	Bench	100	25	5	1	0.269412	0.27	42.0387	36.4	TP
19	Bench	50	11	5	1	1.04037	1.13	43.0202	43.2	TP
19	Bench	50	11	5	2	0.868841	1.08	43.8667	43.7	TP
19	Bench	50	11	5	3	0.914611	1.04	46.1422	47.1	TP
19	Bench	50	11	5	4	0.813842	1	45.1436	46.8	TP
19	Bench	50	11	5	5	0.920857	1.05	45.5785	44.2	TP
19	Bench	50	11	5	6	0.908872	1.16	46.6365	51.6	TP
19	Bench	70	18	5	1	0.680243	0.72	40.765	37.3	TP
19	Bench	70	18	5	2	0.597371	0.63	43.8582	36.6	TP
19	Bench	70	18	5	3	0.592088	0.7	44.8293	42.7	TP
19	Bench	70	18	5	4	0.672536	0.7	44.6101	41.2	TP
19	Bench	70	18	5	5	0.439248	0.49	43.9234	44.1	TP
19	Bench	90	22	5	1	0.378246	0.48	42.7374	44.5	TP
19	Bench	90	22	5	2	0.351354	0.45	43.4743	42.8	TP
19	Bench	90	22	5	3	0.401192	0.56	45.7353	46.3	TP
19	Bench	100	25	5	1	0.303965	0.35	46.1604	46.3	TP
20	Bench	50	25	5	1	0.990958	1.11	53.499	52.8	TP
20	Bench	50	25	5	2	1.02469	1.1	56.2057	53.5	TP
20	Bench	50	25	5	3	1.04318	1.19	56.9644	58	TP
20	Bench	50	25	5	4	1.01529	1.14	57.0927	58	TP
20	Bench	50	25	5	5	1.03846	1.12	58.9557	59.3	TP
20	Bench	70	35	5	1	0.793317	0.9	54.6081	56.6	TP
20	Bench	70	35	5	2	0.745678	0.79	54.4808	52.9	TP
20	Bench	70	35	5	3	0.686049	0.77	50.9164	51.7	TP
20	Bench	70	35	5	4	0.735395	0.8	53.9888	53.1	TP
20	Bench	70	35	5	5	0.697487	0.75	54.4447	53.8	TP
20	Bench	90	45	5	1	0.403428	0.45	51.9569	52.4	TP
20	Bench	90	45	5	2	0.378081	0.43	51.9476	56	TP
20	Bench	90	45	5	3	0.359824	0.38	54.0284	54.5	TP
20	Bench	100	50	5	1	0.160261		45.6424		FN
21	Bench	50	25	5	1		0.41		22.1	FP
21	Bench	50	25	5	2	0.828315	0.86	41.687	40.9	TP
21	Bench	50	25	5	3	0.866019	0.88	41.4657	39.8	TP
21	Bench	50	25	5	4	0.863828	0.88	43.4189	43.3	TP
21	Bench	50	25	5	5	0.799532	0.79	42.3176	42.6	TP
21	Bench	50	25	5	6	0.786329	0.82	44.0141	42.8	TP
21	Bench	70	37	5	1	0.601506	0.72	42.0942	45.1	TP
21	Bench	70	37	5	2	0.584198	0.66	42.8498	41.4	TP
21	Bench	70	37	5	3	0.540996	0.59	41.3828	41.1	TP
21	Bench	70	37	5	4	0.505362	0.6	44.1592	45.9	TP
21	Bench	70	37	5	5	0.413165	0.49	39.641	41.9	TP
21	Bench	90	47	5	1	0.248722	0.26	41.5544	42.4	TP
21	Bench	90	47	5	2	0.189335	0.19	39.0221	38.1	TP
21	Bench	90	47	5	3	0.102674		24.2238		FN
21	Bench	100	50	5	1	0.276528	0.28	38.0073	38.3	TP
22	Bench	50	35	5	1	0.891843	0.91	40.7067	39.7	TP
22	Bench	50	35	5	2	0.892766	0.75	41.9172	39.3	TP
22	Bench	50	35	5	3	0.854756	0.87	43.0413	41.5	TP
22	Bench	50	35	5	4	0.850491	0.81	42.9484	38.7	TP
22	Bench	50	35	5	5	0.852921	0.92	44.3227	43.5	TP
22	Bench	70	50	5	1	0.687207	0.62	38.2964	35.3	TP
22	Bench	70	50	5	2	0.682856	0.68	40.9611	39.8	TP
22	Bench	70	50	5	3	0.61005	0.59	38.7336	36.9	TP
22	Bench	70	50	5	4	0.574714	0.53	37.9567	35.9	TP
22	Bench	70	50	5	5	0.580202	0.52	39.0677	37.2	TP
22	Bench	90	63	5	1	0.442394	0.38	36.0447	31.6	TP
22	Bench	90	63	5	2	0.423548	0.36	35.9387	32.2	TP
22	Bench	90	63	5	3	0.38265	0.31	34.4722	29.9	TP
22	Bench	100	70	5	1	0.357348	0.31	35.9294	30.4	TP
23	Bench	50	35	5	1	0.82781	0.82	41.8107	38.4	TP
23	Bench	50	35	5	2	0.839754	0.83	43.4208	41.1	TP
23	Bench	50	35	5	3	0.860468	0.8	43.0791	39.3	TP
23	Bench	50	35	5	4	0.842499	0.8	43.0972	40.4	TP
23	Bench	50	35	5	5	0.85523	0.8	43.8615	40.5	TP
23	Bench	70	42	5	1	0.660986	0.66	42.2456	40.9	TP
23	Bench	70	42	5	2	0.667058	0.65	42.8835	40.5	TP
23	Bench	70	42	5	3	0.635851	0.64	43.3126	41.3	TP
23	Bench	70	42	5	4	0.649216	0.64	44.3512	41.9	TP
23	Bench	70	42	5	5	0.60693	0.59	42.7867	39.6	TP
23	Bench	90	55	5	1	0.337594	0.29	45.438	37.3	TP
23	Bench	90	55	5	2	0.280892	0.25	45.2622	40.1	TP
23	Bench	90	55	5	3	0.119281		43.0447		FN
23	Bench	100	60	5	1	0.0736607		17.5135		FN
24	Bench	50	30	5	1	0.828233	0.82	49.0231	46.7	TP
24	Bench	50	30	5	2	0.827941	0.82	48.6656	47.1	TP
24	Bench	50	30	5	3	0.858371	0.84	48.6465	45.7	TP
24	Bench	50	30	5	4	0.843142	0.84	49.6564	47.4	TP
24	Bench	50	30	5	5	0.784827	0.79	48.2593	47.3	TP
24	Bench	70	42	5	1	0.540031	0.6	45.8962	46.3	TP
24	Bench	70	42	5	2	0.542624	0.56	45.7236	47.2	TP
24	Bench	70	42	5	3	0.506986	0.52	45.4681	46.9	TP
24	Bench	70	42	5	4	0.431372	0.44	45.6267	47.7	TP
24	Bench	70	42	5	5	0.419949	0.39	44.7211	44	TP
24	Bench	90	53	5	1	0.356864	0.32	45.0699	43.2	TP
24	Bench	90	53	5	2	0.319409	0.31	45.9796	46.1	TP
24	Bench	90	53	5	3	0.349408	0.33	44.9932	45.6	TP
24	Bench	100	60	5	1	0.208014		45.5363		FN
